# Supplementary material for: Replacing Sanger with Next Generation Sequencing to improve coverage and quality of reference DNA barcodes for plants
Source: PubMed Central journal article supplement (PMC5388885; doi:10.1038/srep46040), 2017-04-12
Supplement: srep46040-s1.pdf [file srep46040-s1.pdf]

## **Supplementary Information**

Replacing Sanger with Next Generation Sequencing to improve coverage and quality of reference DNA barcodes for plants

Comprises Supplementary Figures S1,S2, S3,S4; Supplementary Methods S1,S2,S3 & Supplementary Tables S1,S2,S3,S4,S5,S6

Mike J. Wilkinson<sup>1\*</sup>, Claudia Szabo<sup>2</sup>, Caroline S. Ford<sup>1</sup>, Yuval Yarom<sup>2</sup>, Adam E. Croxford<sup>3</sup>,  
Amanda Camp<sup>4</sup>, Paul Gooding<sup>5</sup>

**Supplementary Fig. S1. Information content of barcode alignments.** Plots showing the relationship between the number of DNA barcodes compared in an alignment and the number of shared bases that can be used to distinguish between: a) *rbcl* barcodes; b) *matK* barcodes; c) only *rbcl* barcodes of length >300bases aligned and d) only *matK* barcodes of length >300 bases aligned.

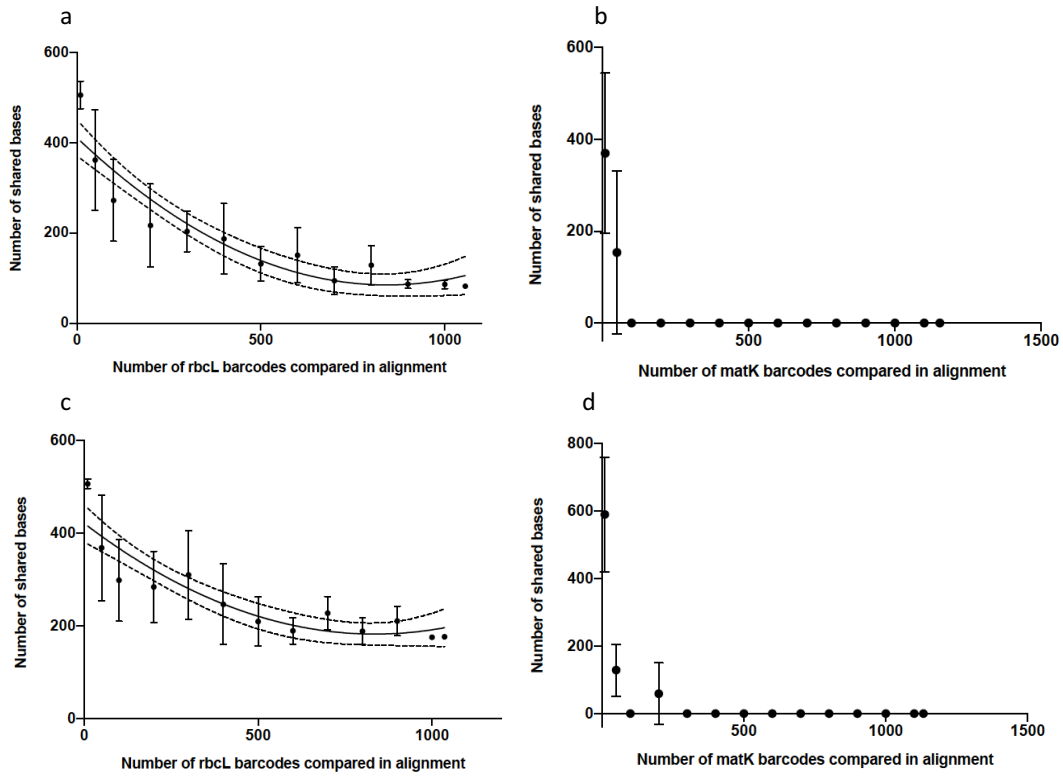

**Supplementary Fig. S2. Genus identification accuracy for unknown samples matched to an incomplete reference DNA barcode resource.** A model constructs a comprehensive reference barcode (CRB) resource from 721 whole chloroplast genomes and associated variants derived from the BOLD Systems 3 database to represent all barcodes in a hypothetical geographic area. The model then takes subsets of barcodes from the CRB to represent incomplete coverage of barcodes in the reference database (Interim Reference Barcode, IRB) and also a random set of unknown samples from the CRB to represent an Ecological Study Set. The panels below indicate the various outcomes: perceived identifications (red); ambiguous (blue); unknowns (black); true (pink) or false (orange) when identification of samples from the ESS (200 species) is attempted by exact matches made to IRBs of various sizes for: a) *rbcL*, b) *matK* and c) *rbcL* + *matK*.

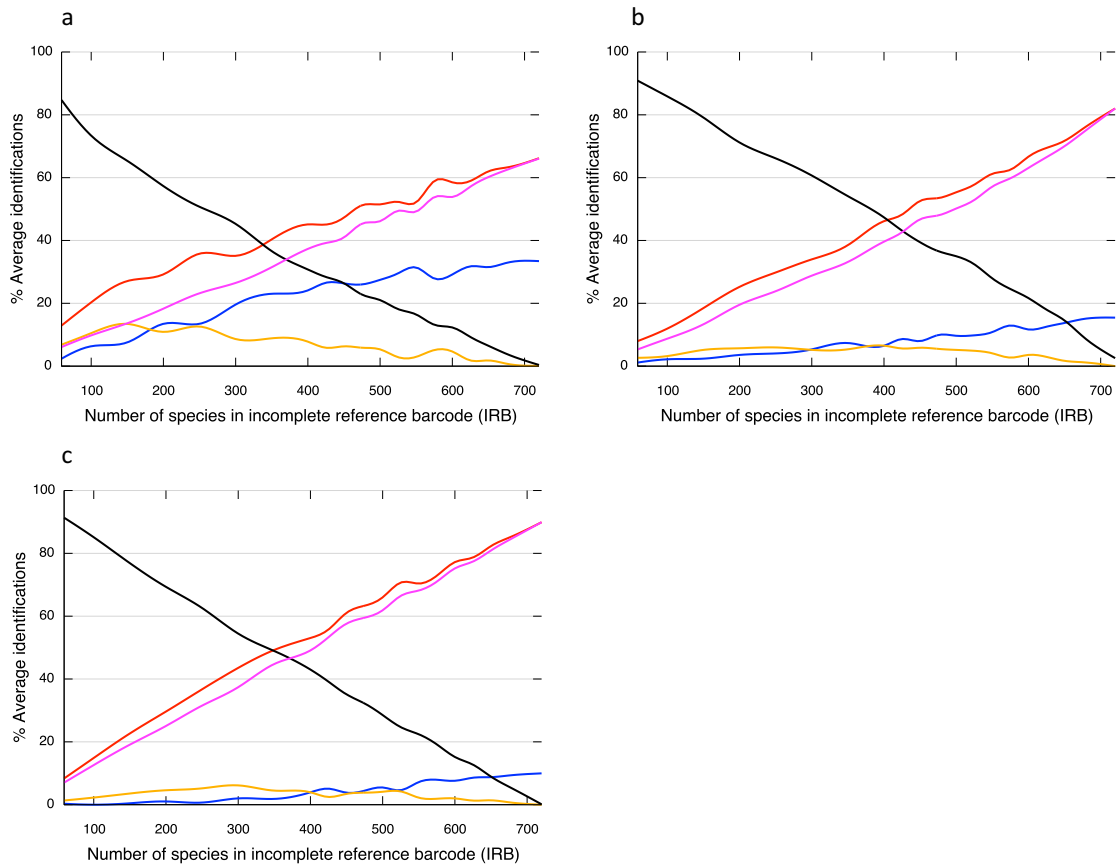

**Supplementary Fig S3. Influence of Ecological Study Set (ESS) size on barcode diagnostic performance.** A model constructs a comprehensive reference barcode (CRB) resource from 721 whole chloroplast genomes and associated variants derived from the BOLD Systems 3 database to represent all barcodes in a hypothetical region. The model then takes subsets of barcodes from the CRB to represent incomplete coverage of barcodes in the reference database (Interim Reference Barcode, IRB) and also a random set of unknown samples from the CRB to represent Ecological Study Sets of varying size. The panels below indicate the various outcomes: perceived identifications (red); ambiguous (blue); unknowns (black); true (pink); false (orange) when identification of samples taken from ESS sets of varying size (long dashed line = 50 species; square dashed line = 100 species; fine dashed line = 150 species; solid line = 200 species) is attempted by exact matches to IRBs of varying size (x-axis) for: a) *rbcl*, b) *matK* and c) *rbcl* + *matK*.

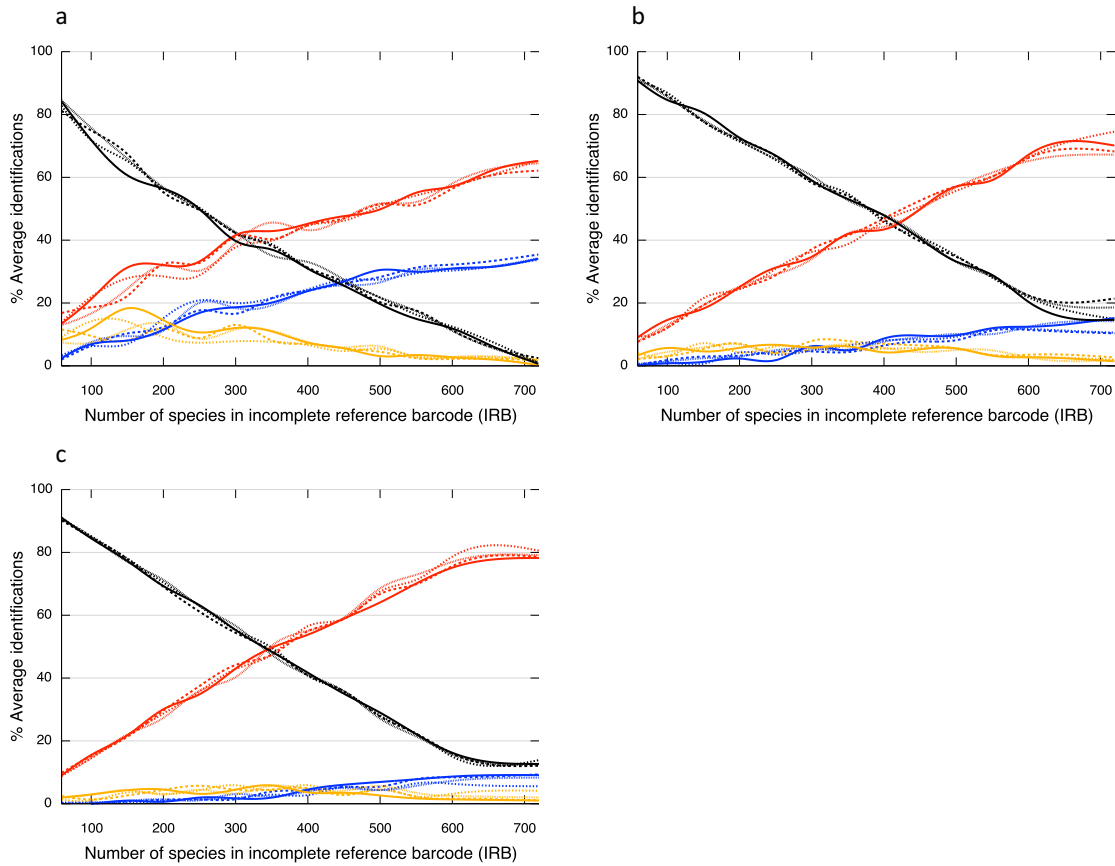

**Supplementary Fig. S4. Extended reference DNA barcodes by Next Generation Sequencing.** Extended amplicons ( $\approx 1,400\text{bp}$ ) of *rbcL* and *matK* were sonicated, tag-labelled and sequenced on the Illumina V3 MiSeq platform. Resultant fragments were assembled to create a contig of the entire amplicon. The panels below illustrate readouts indicating consensus sequences generated in the assembled contig (upper bar, where black=G; green=A; red=T and Blue=C); percent consensus agreement for all reads passing filter (red line); and the number of individual sequences contributing to each base position (blue line) for: *matK* (a-d) and *rbcL* (e-h) with Amaranthaceae samples *Sclerolaena patenticuspis* M34 (a, e); *Maireana lobiflora* M45 (b, f); *Rhagodia crassifolia* M49 (c, g); *Rhagodia parabolica* M64 (d, h).

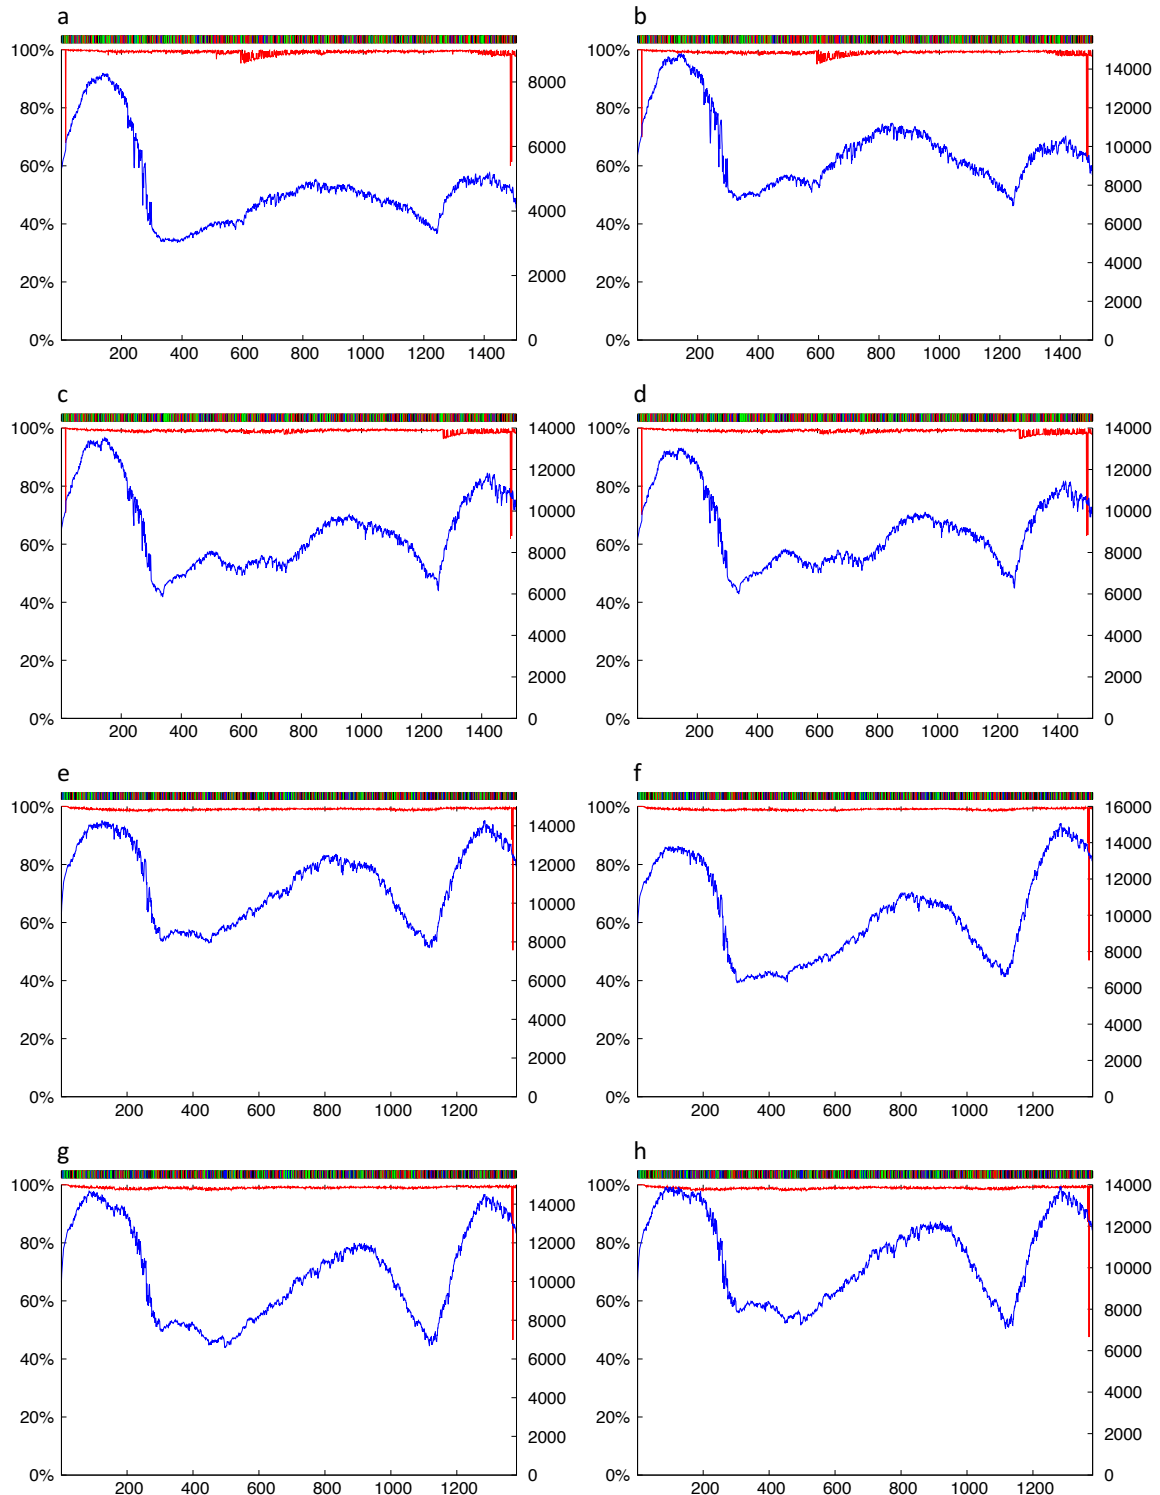

### Supplementary Methods S1

We estimated the proportion of species in BOLD Systems ([www.boldsystems.org](http://www.boldsystems.org), visited June 2016) containing both *rbcL* and *matK* by retrieving species records at frequencies reflecting the major taxonomic divisions of land plants. Entries at this time comprised 92.3% Magnoliophyta (331486/359087); 1.9% Pinophyta (6824/359087); 2.8%, Pteridophyta (10047/359087); 0.3% Lycopodiophyta (923/359087) and 2.7% Bryophyta (9807/359087). We first attained species lists for each of these phyla and, working sequentially down arbitrary pages, selected the appropriate number of species per phylum to a total of 1,000 (viz: 923 species of Magnoliophyta; 19 Pinophyta; 28 Pteridophyta; 3 Lycopodiophyta; 27 Bryophyta). To calculate the proportion of these species with 'full barcode coverage' (both *rbcL* and *matK*), single species searches were performed in BOLD and sequence presence recorded (Supplementary Table S1 online).

To test the effect of variable sequence overlap in multi-specimen alignments from BOLD Systems we downloaded all *rbcL* and *matK* entries for 101 congeneric species (Supplementary Table S2 online) into a Geneious 8.1 (Biomatters) database comprising 2,210 records (1056 *rbcL*, 1154 *matK*). For each locus sequences were aligned using MUSCLE (10 iterations). Left and right borders of universal coverage (bases present across all records) were identified and size (bp) of universally shared overlap recorded. We simulated partial representation of the reference database by randomly removing records and recalculating overlap. Five replicates per alignment size (number of records: 10; 50; 100; 200; 300; 400; 500; 600; 700; 800; 900; 1000, 1100) were generated using a random number generator ([www.random.org](http://www.random.org)). Non-linear regression of the resultant data was performed using GraphPad Prism V8.00 (La Jolla). To evaluate the effect of filtering short reads prior to alignment, we removed sequences <300bp (both loci) and <500bp (*rbcL*) or <600bp (*matK*) from the original data set and repeated the experiment.

## Supplementary Methods S2

To model the importance of incomplete species coverage in the reference database, we first constructed an artificial Comprehensive Reference Barcode (CRB) database to represent the entire land plant flora of a hypothetical region. Here, we recovered full-gene sequences for *rbcl* and *matK* from 735 chloroplast genomes from the National Center for Biotechnology Information database ([ncbi.nlm.nih.gov](http://ncbi.nlm.nih.gov)) of which 721 species contained both genes (Supplementary Table S3 online). These 721 *rbcl* and *matK* sequences were trimmed in Geneious 8.1 to match the nominal barcode regions internal to primers *rbcl*<sub>a\_f</sub><sup>46</sup> and *rbcl*<sub>a\_rev</sub><sup>47</sup> and *matK*<sub>xF</sub><sup>28</sup> and MALPR1<sup>40</sup>. We simulated intraspecific variation by including all barcodes retrieved from BOLD Systems for these same species. In addition, we replaced ambiguous (N) and missing bases using the full-length sequences retrieved from the chloroplast genomes (Supplementary Table S3 online). Thus, all barcodes in our database were full-length.

To simulate the process of building a reference barcode database from scratch we created 200 separate Incomplete Reference Barcode (IRB) sets from the CRB, with each set containing the same number of species ( $N_s$ ) in the range 70-721 species. This was achieved using the Python code IRB Assembly. IRB Assembly (available at <http://bit.ly/next-gen-barcode>) contains a 'Regional CRB dataset' representing the CRB. This dataset is encoded as a map, where the key is represented by the species/genus name, and the value is a barcode. If the key is not unique, i.e. a species (or genus) appears more than once in the CRB the value is then an array of barcodes. To generate IRBs from the Regional CRB dataset we first generate the IRB\_Map, a dataset similar in structure to Regional\_CRB. For each pre-determined IRB size  $s$ , a number of  $s$  keys are randomly selected from the Regional\_CRB dataset, and are added to IRB\_Map. CRBs and IRBs were assembled for *rbcl*, *matK* and the concatenated barcode *rbcl* + *matK*.

We entered these CRBs and IRBs into a model (IRB size) to characterize changes to the diagnostic properties of *rbcl* and *matK* as the IRB expands. The model (described below) identified barcodes as species-unique (true) when they possessed only one species name in both the IRB and CRB. However, if the barcode sequence was attached to two or more names in the IRB (also in the CRB), it was deemed ambiguous. Cases where discordance occurred between IRB and CRB assignments (species-unique barcodes in the IRB but not the CRB) were deemed false (negatives). The IRB Size model plotted the frequency of all diagnostic outcomes as the IRBs expanded from 70 to 721 species. This process was repeated with the species names replaced by the generic epithet alone to provide plots for genus-level diagnosis. The Python code IRB Size (available at <http://bit.ly/next-gen-barcode>) employs the Regional\_CRB and IRB\_Map, for species and genus respectively. The code goes through each key in IRB\_Map and, if it has associated more than one value, that key is deemed ambiguous. If the key has associated one value in IRB\_Map, but more than one value in Regional\_CRB, then it is deemed false (negative). The code calculates the frequencies of these assignments as the number of keys in IRB\_Map increases.

### Supplementary Methods S3

Real-world identification using DNA barcodes requires comparison between unknown specimens and reference barcodes. To model this, we simulated variable collections of field specimens requiring identification: Ecological Study Sets (ESS). ESS assembly was achieved using the code ESS Diagnosis in which barcodes were randomly selected from the CRB with replacement and added to the ESS. We made no allowance for technical (sequencing, identification) error when generating either ESS or reference barcodes. For each ESS size  $ess\_s$  (50, 100, 300, 700) our program (ESS Diagnosis) randomly selects  $ess\_s$  barcodes from all the values in the Regional\_CRB map and adds them to an array called ESS\_Vector.

We next attempted to identify the species within each ESS by reference to barcodes in IRBs of differing size thus mimicking attempts to identify unknown specimens using incomplete reference barcode databases. The first iteration of the model used exact sequence matches as the only basis to define species identification. The model (described below) deemed that when ESS specimens possessed barcodes that uniquely matched barcode(s) with a single species name in the IRB these were perceived identifications. Specimens with barcodes shared by two or more IRB species were deemed ambiguous. Specimens that were assigned perceived from the IRB but were ambiguous in the CRB were categorized false. True identifications were barcodes that were species-specific in both IRB and CRB. Failed matches were classified unknowns. The model used ESS sets of a single size (200 species) and one barcode (*rbcl*, *matK* or *rbcl+matK*) in each run, and recorded how each of the identification categories described above changed with IRB size. Our Python code ESS Diagnosis (available at <http://bit.ly/next-gen-barcode>) employs an additional data structure reverse\_IRB\_Map, where the keys are the unique IRB barcodes and the values are the species (or genus) names. Our code analyses each barcode  $b$  in ESS\_Vector. For every barcode  $b$ , our code checks the reverse IRB\_Map to see if the barcode maps to a unique species/genus name and classifies it as described above.

The model was repeated using the combined barcode (*rbcl+matK*) but imposing different sequence similarity thresholds  $t$  (97, 98, 99, 99.5 and 99.9% sequence similarity) to define sequence matches between the ESS query specimens (fixed at 200 species) and reference barcodes in the IRBs (50-721 species). The code ESS Diagnosis+ (available at <http://bit.ly/next-gen-barcode>) defined the optimum sequence similarity threshold ( $O_t$ ) generating the highest proportion of true identifications out of all barcodes evaluated. Values of  $O_t$  were plotted as the size of the IRB increased towards 721 species. ESS Diagnosis+ employs an exact match between the barcode  $b$  in ESS\_Vector and the keys in reverse\_IRB\_Map, and checks to see if there is a sequence similarity greater than a specified threshold  $t$ , with the values defined above. If the similarity exists, then the code proceeds as above.



**Supplementary Table S1. Core barcode coverage in BOLD Systems.** Coverage of the core barcode (*rbcL* and *matK*) among 1,000 species records in listed the BOLD Systems V3 database. Species and Phylum name are given in the first two columns, along with the presence (1) or absence (0) of *rbcL* sequence (column 3) and *matK* sequence (column 4).

| Species                            | Phylum         | rbcL | matK |
|------------------------------------|----------------|------|------|
| <i>Andreaea nitida</i>             | Bryophyta      | 1    | 0    |
| <i>Andreaea rupestris</i>          | Bryophyta      | 1    | 0    |
| <i>Anomobryum julaceum</i>         | Bryophyta      | 1    | 0    |
| <i>Aulacomnium androgynum</i>      | Bryophyta      | 1    | 0    |
| <i>Bartramia breviseta</i>         | Bryophyta      | 1    | 0    |
| <i>Bartramia halleriana</i>        | Bryophyta      | 1    | 0    |
| <i>Bartramia pomiformis</i>        | Bryophyta      | 1    | 0    |
| <i>Bartramia stricta</i>           | Bryophyta      | 1    | 0    |
| <i>Brachymenium nepalense</i>      | Bryophyta      | 1    | 0    |
| <i>Brachymenium pulchrum</i>       | Bryophyta      | 1    | 0    |
| <i>Bryum billardierei</i>          | Bryophyta      | 1    | 0    |
| <i>Bryum caespiticium</i>          | Bryophyta      | 1    | 0    |
| <i>Bryum pseudotriquetrum</i>      | Bryophyta      | 1    | 0    |
| <i>Imbriobryum alpinum</i>         | Bryophyta      | 1    | 0    |
| <i>Leiomela bartramioides</i>      | Bryophyta      | 1    | 0    |
| <i>Mesochaete undulata</i>         | Bryophyta      | 1    | 0    |
| <i>Neosharpiella aztecorum</i>     | Bryophyta      | 1    | 0    |
| <i>Philonotis andina</i>           | Bryophyta      | 1    | 0    |
| <i>Philonotis fontana</i>          | Bryophyta      | 1    | 0    |
| <i>Philonotis nitida</i>           | Bryophyta      | 1    | 0    |
| <i>Plagiobryum cyclophyllum</i>    | Bryophyta      | 1    | 0    |
| <i>Plagiobryum zierii</i>          | Bryophyta      | 1    | 0    |
| <i>Plagiopus oederi</i>            | Bryophyta      | 1    | 0    |
| <i>Rhodobryum giganteum</i>        | Bryophyta      | 1    | 0    |
| <i>Rhodobryum ontariense</i>       | Bryophyta      | 1    | 0    |
| <i>Rosulabryum capillare</i>       | Bryophyta      | 1    | 0    |
| <i>Schistidium strictum</i>        | Bryophyta      | 1    | 0    |
| <i>Huperzia lucidula</i>           | Lycopodiophyta | 1    | 1    |
| <i>Lycopodium clavatum</i>         | Lycopodiophyta | 1    | 0    |
| <i>Lycopodium dendroideum</i>      | Lycopodiophyta | 1    | 0    |
| <i>Hypoxis glabella</i>            | Magnoliophyta  | 1    | 0    |
| <i>Aa paleacea</i>                 | Magnoliophyta  | 1    | 1    |
| <i>Acalypha hispida</i>            | Magnoliophyta  | 1    | 0    |
| <i>Acalypha hispida</i>            | Magnoliophyta  | 1    | 0    |
| <i>Acanthephippium mantinianum</i> | Magnoliophyta  | 1    | 1    |
| <i>Acer palmatum</i>               | Magnoliophyta  | 1    | 1    |
| <i>Achlydosa glandulosa</i>        | Magnoliophyta  | 1    | 1    |
| <i>Acianthus exsertus</i>          | Magnoliophyta  | 1    | 1    |
| <i>Acineta chrysantha</i>          | Magnoliophyta  | 1    | 1    |
| <i>Acineta superba</i>             | Magnoliophyta  | 0    | 1    |
| <i>Acostaea costaricensis</i>      | Magnoliophyta  | 0    | 1    |
| <i>Ada aurantiaca</i>              | Magnoliophyta  | 0    | 1    |
| <i>Adenium obesum</i>              | Magnoliophyta  | 1    | 1    |
| <i>Aegiceras corniculatum</i>      | Magnoliophyta  | 1    | 1    |
| <i>Aerangis articulata</i>         | Magnoliophyta  | 1    | 1    |
| <i>Aeranthus grandiflora</i>       | Magnoliophyta  | 0    | 1    |
| <i>Aeranthus ramosa</i>            | Magnoliophyta  | 1    | 1    |
| <i>Aerides crista</i>              | Magnoliophyta  | 0    | 1    |
| <i>Aerides emericii</i>            | Magnoliophyta  | 0    | 1    |
| <i>Aerides lawrenciae</i>          | Magnoliophyta  | 0    | 1    |
| <i>Aerides leana</i>               | Magnoliophyta  | 0    | 1    |
| <i>Aerides multiflora</i>          | Magnoliophyta  | 1    | 1    |
| <i>Aerides ringens</i>             | Magnoliophyta  | 0    | 1    |
| <i>Aglaonema crispum</i>           | Magnoliophyta  | 1    | 1    |
| <i>Aglaonema crispum</i>           | Magnoliophyta  | 1    | 1    |
| <i>Agrostis mertensii</i>          | Magnoliophyta  | 1    | 1    |
| <i>Alamania punicea</i>            | Magnoliophyta  | 0    | 1    |
| <i>Aloe arborescens</i>            | Magnoliophyta  | 1    | 1    |
| <i>Aloe aristata</i>               | Magnoliophyta  | 1    | 1    |
| <i>Aloe barberae</i>               | Magnoliophyta  | 1    | 1    |
| <i>Aloe bowiea</i>                 | Magnoliophyta  | 1    | 1    |
| <i>Aloe brevifolia</i>             | Magnoliophyta  | 1    | 1    |
| <i>Aloe buhrii</i>                 | Magnoliophyta  | 1    | 1    |
| <i>Aloe cannellii</i>              | Magnoliophyta  | 1    | 1    |
| <i>Aloe commixta</i>               | Magnoliophyta  | 1    | 1    |
| <i>Aloe comosa</i>                 | Magnoliophyta  | 1    | 1    |
| <i>Aloe dewinteri</i>              | Magnoliophyta  | 1    | 1    |
| <i>Aloe dichotoma</i>              | Magnoliophyta  | 1    | 1    |
| <i>Aloe dyeri</i>                  | Magnoliophyta  | 1    | 1    |
| <i>Aloe erinacea</i>               | Magnoliophyta  | 1    | 1    |
| <i>Aloe fosteri</i>                | Magnoliophyta  | 1    | 1    |
| <i>Aloe glauca</i>                 | Magnoliophyta  | 1    | 1    |
| <i>Aloe globuligemma</i>           | Magnoliophyta  | 1    | 1    |

|                                       |               |   |   |
|---------------------------------------|---------------|---|---|
| <i>Aloe gracilis</i>                  | Magnoliophyta | 1 | 1 |
| <i>Aloe greatheadii</i>               | Magnoliophyta | 1 | 1 |
| <i>Aloe haworthioides</i>             | Magnoliophyta | 1 | 1 |
| <i>Aloe hereroensis</i>               | Magnoliophyta | 1 | 1 |
| <i>Aloe hexapetala</i>                | Magnoliophyta | 1 | 1 |
| <i>Aloe humilis</i>                   | Magnoliophyta | 1 | 1 |
| <i>Aloe juddii</i>                    | Magnoliophyta | 1 | 1 |
| <i>Aloe kouebokkeveldensis</i>        | Magnoliophyta | 1 | 1 |
| <i>Aloe lineata</i>                   | Magnoliophyta | 1 | 1 |
| <i>Aloe melanacantha</i>              | Magnoliophyta | 1 | 1 |
| <i>Aloe microstigma</i>               | Magnoliophyta | 1 | 1 |
| <i>Aloe perfoliata</i>                | Magnoliophyta | 1 | 1 |
| <i>Aloe pictifolia</i>                | Magnoliophyta | 1 | 1 |
| <i>Aloe plicatilis</i>                | Magnoliophyta | 1 | 1 |
| <i>Aloe reynoldsii</i>                | Magnoliophyta | 1 | 1 |
| <i>Aloe striata</i>                   | Magnoliophyta | 1 | 1 |
| <i>Aloe striatula</i>                 | Magnoliophyta | 1 | 1 |
| <i>Aloe succotrina</i>                | Magnoliophyta | 1 | 1 |
| <i>Aloe tenuior</i>                   | Magnoliophyta | 1 | 1 |
| <i>Aloe thraskii</i>                  | Magnoliophyta | 1 | 1 |
| <i>Aloe variegata</i>                 | Magnoliophyta | 1 | 1 |
| <i>Alopecurus magellanicus</i>        | Magnoliophyta | 1 | 1 |
| <i>Amblostoma armeniacum</i>          | Magnoliophyta | 1 | 1 |
| <i>Amblostoma cernuum</i>             | Magnoliophyta | 0 | 1 |
| <i>Amelichloa brachychaeta</i>        | Magnoliophyta | 1 | 1 |
| <i>Amelichloa clandestina</i>         | Magnoliophyta | 0 | 1 |
| <i>Amerorchis rotundifolia</i>        | Magnoliophyta | 1 | 0 |
| <i>Ammophila breviligulata</i>        | Magnoliophyta | 1 | 1 |
| <i>Amorphophallus yunnanensis</i>     | Magnoliophyta | 1 | 1 |
| <i>Amorphophallus zenkeri</i>         | Magnoliophyta | 1 | 1 |
| <i>Ampelodesmos mauritanicus</i>      | Magnoliophyta | 1 | 1 |
| <i>Amphibromus fluitans</i>           | Magnoliophyta | 1 | 0 |
| <i>Amphibromus scabrivalvis</i>       | Magnoliophyta | 0 | 1 |
| <i>Amphipogon caricinus</i>           | Magnoliophyta | 1 | 1 |
| <i>Amphipogon strictus</i>            | Magnoliophyta | 1 | 0 |
| <i>Anatherostipa bomanii</i>          | Magnoliophyta | 0 | 1 |
| <i>Anatherostipa hans-meyeri</i>      | Magnoliophyta | 0 | 1 |
| <i>Anatherostipa mucronata</i>        | Magnoliophyta | 0 | 1 |
| <i>Anatherostipa obtusa</i>           | Magnoliophyta | 0 | 1 |
| <i>Anatherostipa rigidiseta</i>       | Magnoliophyta | 0 | 1 |
| <i>Anatherostipa rosea</i>            | Magnoliophyta | 0 | 1 |
| <i>Anatherostipa venusta</i>          | Magnoliophyta | 0 | 1 |
| <i>Anchomanes difformis</i>           | Magnoliophyta | 1 | 1 |
| <i>Ancistrochilus rothschildianus</i> | Magnoliophyta | 1 | 1 |
| <i>Andromeda polifolia</i>            | Magnoliophyta | 1 | 1 |
| <i>Andropogon gerardii</i>            | Magnoliophyta | 1 | 1 |
| <i>Androsace chamaejasme</i>          | Magnoliophyta | 1 | 1 |
| <i>Androsace septentrionalis</i>      | Magnoliophyta | 1 | 1 |
| <i>Anemone parviflora</i>             | Magnoliophyta | 1 | 1 |
| <i>Angraecum magdalenae</i>           | Magnoliophyta | 0 | 1 |
| <i>Angraecum sesquipedale</i>         | Magnoliophyta | 1 | 1 |
| <i>Anguloa hohenlohii</i>             | Magnoliophyta | 0 | 1 |
| <i>Ansellia africana</i>              | Magnoliophyta | 1 | 1 |
| <i>Antennaria friesiana</i>           | Magnoliophyta | 1 | 1 |
| <i>Antennaria media</i>               | Magnoliophyta | 1 | 1 |
| <i>Anthogonium gracile</i>            | Magnoliophyta | 1 | 1 |
| <i>Anthoxanthum arcticum</i>          | Magnoliophyta | 1 | 1 |
| <i>Anthoxanthum monticola</i>         | Magnoliophyta | 1 | 1 |
| <i>Anthoxanthum monticola</i>         | Magnoliophyta | 1 | 1 |
| <i>Anthurium scherzerianum</i>        | Magnoliophyta | 1 | 0 |
| <i>Aphyllorchis caudata</i>           | Magnoliophyta | 1 | 0 |
| <i>Aphyllorchis montana</i>           | Magnoliophyta | 1 | 0 |
| <i>Aplectrum hyemale</i>              | Magnoliophyta | 1 | 1 |
| <i>Arbutus unedo</i>                  | Magnoliophyta | 1 | 1 |
| <i>Arctagrostis latifolia</i>         | Magnoliophyta | 1 | 1 |
| <i>Arctophila fulva</i>               | Magnoliophyta | 1 | 1 |
| <i>Arctous rubra</i>                  | Magnoliophyta | 1 | 1 |
| <i>Areca catechu</i>                  | Magnoliophyta | 1 | 1 |
| <i>Areca triandra</i>                 | Magnoliophyta | 1 | 1 |
| <i>Arenaria longipedunculata</i>      | Magnoliophyta | 1 | 1 |
| <i>Arenaria australasica</i>          | Magnoliophyta | 1 | 1 |
| <i>Arenaria brevipes</i>              | Magnoliophyta | 1 | 1 |
| <i>Arenaria caudata</i>               | Magnoliophyta | 1 | 1 |
| <i>Arenaria engleri</i>               | Magnoliophyta | 1 | 1 |
| <i>Arenaria hastata</i>               | Magnoliophyta | 1 | 1 |
| <i>Arenaria hookeriana</i>            | Magnoliophyta | 1 | 1 |
| <i>Arenaria listeri</i>               | Magnoliophyta | 1 | 1 |
| <i>Arenaria longicarpa</i>            | Magnoliophyta | 1 | 0 |
| <i>Arenaria microcarpa</i>            | Magnoliophyta | 1 | 1 |
| <i>Arenaria obtusifolia</i>           | Magnoliophyta | 1 | 1 |
| <i>Arenaria pinnata</i>               | Magnoliophyta | 1 | 1 |

|                                  |               |   |   |
|----------------------------------|---------------|---|---|
| <i>Arenga porphyrocarpa</i>      | Magnoliophyta | 1 | 1 |
| <i>Arenga ryukyuensis</i>        | Magnoliophyta | 1 | 1 |
| <i>Arenga tremula</i>            | Magnoliophyta | 1 | 1 |
| <i>Arenga undulatifolia</i>      | Magnoliophyta | 1 | 1 |
| <i>Arenga westerhoutii</i>       | Magnoliophyta | 1 | 1 |
| <i>Ariopsis peltata</i>          | Magnoliophyta | 1 | 1 |
| <i>Arisaema serratum</i>         | Magnoliophyta | 1 | 1 |
| <i>Arisaema speciosum</i>        | Magnoliophyta | 1 | 1 |
| <i>Arisaema tortuosum</i>        | Magnoliophyta | 1 | 1 |
| <i>Arisaema triphyllum</i>       | Magnoliophyta | 1 | 1 |
| <i>Arisarum vulgare</i>          | Magnoliophyta | 1 | 1 |
| <i>Arnica frigida</i>            | Magnoliophyta | 1 | 1 |
| <i>Artemisia borealis</i>        | Magnoliophyta | 1 | 1 |
| <i>Arum alpinum</i>              | Magnoliophyta | 1 | 1 |
| <i>Arum apulum</i>               | Magnoliophyta | 1 | 1 |
| <i>Arum balansanum</i>           | Magnoliophyta | 1 | 1 |
| <i>Arum byzantinum</i>           | Magnoliophyta | 1 | 1 |
| <i>Arum concinatum</i>           | Magnoliophyta | 1 | 1 |
| <i>Arum creticum</i>             | Magnoliophyta | 1 | 1 |
| <i>Arum cylindraceum</i>         | Magnoliophyta | 1 | 1 |
| <i>Arum cyrenaicum</i>           | Magnoliophyta | 1 | 1 |
| <i>Arum dioscoridis</i>          | Magnoliophyta | 1 | 1 |
| <i>Arum elongatum</i>            | Magnoliophyta | 1 | 1 |
| <i>Arum euxinum</i>              | Magnoliophyta | 1 | 1 |
| <i>Arum gratum</i>               | Magnoliophyta | 1 | 1 |
| <i>Arum hygrophilum</i>          | Magnoliophyta | 1 | 1 |
| <i>Arum idaeum</i>               | Magnoliophyta | 1 | 1 |
| <i>Arum italicum</i>             | Magnoliophyta | 1 | 1 |
| <i>Arum jacquemantii</i>         | Magnoliophyta | 1 | 1 |
| <i>Arum korolkowii</i>           | Magnoliophyta | 1 | 1 |
| <i>Arum maculatum</i>            | Magnoliophyta | 1 | 1 |
| <i>Arum nigrum</i>               | Magnoliophyta | 1 | 1 |
| <i>Arum orientale</i>            | Magnoliophyta | 1 | 1 |
| <i>Arum palaestinum</i>          | Magnoliophyta | 1 | 1 |
| <i>Arum pictum</i>               | Magnoliophyta | 1 | 1 |
| <i>Arum purpureospathum</i>      | Magnoliophyta | 1 | 1 |
| <i>Arum rupicola</i>             | Magnoliophyta | 1 | 1 |
| <i>Arum sintenisii</i>           | Magnoliophyta | 1 | 1 |
| <i>Asparagus aethiopicus</i>     | Magnoliophyta | 1 | 1 |
| <i>Asparagus aethiopicus</i>     | Magnoliophyta | 1 | 1 |
| <i>Asterogyne martiana</i>       | Magnoliophyta | 1 | 1 |
| <i>Astragalus alpinus</i>        | Magnoliophyta | 1 | 1 |
| <i>Astragalus alpinus</i>        | Magnoliophyta | 1 | 1 |
| <i>Astragalus eucosmus</i>       | Magnoliophyta | 1 | 1 |
| <i>Astragalus eucosmus</i>       | Magnoliophyta | 1 | 1 |
| <i>Astragalus nutzotiniensis</i> | Magnoliophyta | 1 | 1 |
| <i>Astragalus richardsonii</i>   | Magnoliophyta | 1 | 1 |
| <i>Astragalus umbellatus</i>     | Magnoliophyta | 1 | 1 |
| <i>Astrocaryum alatum</i>        | Magnoliophyta | 1 | 1 |
| <i>Astrocaryum chambira</i>      | Magnoliophyta | 0 | 1 |
| <i>Astrocaryum gynacanthum</i>   | Magnoliophyta | 0 | 1 |
| <i>Astrocaryum huaimi</i>        | Magnoliophyta | 0 | 1 |
| <i>Astrocaryum jauari</i>        | Magnoliophyta | 0 | 1 |
| <i>Astrocaryum malybo</i>        | Magnoliophyta | 0 | 1 |
| <i>Astrocaryum mexicanum</i>     | Magnoliophyta | 0 | 1 |
| <i>Astrocaryum minus</i>         | Magnoliophyta | 0 | 1 |
| <i>Astrocaryum murumuru</i>      | Magnoliophyta | 1 | 1 |
| <i>Astrocaryum paramaca</i>      | Magnoliophyta | 0 | 1 |
| <i>Astrocaryum rodriguesii</i>   | Magnoliophyta | 1 | 1 |
| <i>Astrocaryum sciophilum</i>    | Magnoliophyta | 1 | 1 |
| <i>Astrocaryum scopatum</i>      | Magnoliophyta | 1 | 1 |
| <i>Astrocaryum standleyanum</i>  | Magnoliophyta | 0 | 1 |
| <i>Astrocaryum urostachys</i>    | Magnoliophyta | 0 | 1 |
| <i>Astrocaryum vulgare</i>       | Magnoliophyta | 0 | 1 |
| <i>Astroloba bullulata</i>       | Magnoliophyta | 1 | 1 |
| <i>Astroloba corrugata</i>       | Magnoliophyta | 1 | 1 |
| <i>Astroloba foliolosa</i>       | Magnoliophyta | 1 | 1 |
| <i>Astroloba herrei</i>          | Magnoliophyta | 1 | 1 |
| <i>Astroloba rubriflora</i>      | Magnoliophyta | 1 | 1 |
| <i>Astroloba smutsiana</i>       | Magnoliophyta | 1 | 1 |
| <i>Astroloba spiralis</i>        | Magnoliophyta | 1 | 1 |
| <i>Attalea allenii</i>           | Magnoliophyta | 1 | 1 |
| <i>Attalea butyracea</i>         | Magnoliophyta | 1 | 0 |
| <i>Attalea phalerata</i>         | Magnoliophyta | 0 | 1 |
| <i>Austrostipa acrociliata</i>   | Magnoliophyta | 1 | 1 |
| <i>Austrostipa aphylla</i>       | Magnoliophyta | 1 | 1 |
| <i>Austrostipa aquarii</i>       | Magnoliophyta | 1 | 1 |
| <i>Austrostipa aristiglumis</i>  | Magnoliophyta | 1 | 1 |
| <i>Austrostipa bigeniculata</i>  | Magnoliophyta | 1 | 0 |
| <i>Austrostipa blackii</i>       | Magnoliophyta | 1 | 1 |
| <i>Austrostipa breviglumis</i>   | Magnoliophyta | 1 | 1 |

|                                         |               |   |   |
|-----------------------------------------|---------------|---|---|
| <i>Austrostipa centralis</i>            | Magnoliophyta | 0 | 1 |
| <i>Austrostipa compressa</i>            | Magnoliophyta | 1 | 1 |
| <i>Austrostipa crinita</i>              | Magnoliophyta | 1 | 1 |
| <i>Austrostipa curticoma</i>            | Magnoliophyta | 1 | 0 |
| <i>Austrostipa densiflora</i>           | Magnoliophyta | 1 | 1 |
| <i>Austrostipa dongicola</i>            | Magnoliophyta | 1 | 0 |
| <i>Austrostipa drummondii</i>           | Magnoliophyta | 1 | 1 |
| <i>Austrostipa elegantissima</i>        | Magnoliophyta | 1 | 1 |
| <i>Austrostipa eremophila</i>           | Magnoliophyta | 1 | 0 |
| <i>Austrostipa exilis</i>               | Magnoliophyta | 1 | 1 |
| <i>Austrostipa feresetacea</i>          | Magnoliophyta | 1 | 1 |
| <i>Austrostipa flavescens</i>           | Magnoliophyta | 1 | 1 |
| <i>Austrostipa geoffrey</i>             | Magnoliophyta | 1 | 1 |
| <i>Austrostipa gibbosa</i>              | Magnoliophyta | 1 | 1 |
| <i>Austrostipa hemipogon</i>            | Magnoliophyta | 1 | 1 |
| <i>Austrostipa juncifolia</i>           | Magnoliophyta | 1 | 1 |
| <i>Austrostipa macalpinei</i>           | Magnoliophyta | 1 | 1 |
| <i>Austrostipa mollis</i>               | Magnoliophyta | 1 | 1 |
| <i>Austrostipa muelleri</i>             | Magnoliophyta | 1 | 1 |
| <i>Austrostipa mundula</i>              | Magnoliophyta | 1 | 1 |
| <i>Austrostipa nitida</i>               | Magnoliophyta | 1 | 1 |
| <i>Austrostipa nivicola</i>             | Magnoliophyta | 1 | 1 |
| <i>Austrostipa nodosa</i>               | Magnoliophyta | 1 | 1 |
| <i>Austrostipa nullanulla</i>           | Magnoliophyta | 1 | 1 |
| <i>Austrostipa oligostachya</i>         | Magnoliophyta | 1 | 1 |
| <i>Austrostipa platychaeta</i>          | Magnoliophyta | 1 | 1 |
| <i>Austrostipa puberula</i>             | Magnoliophyta | 1 | 1 |
| <i>Austrostipa pubescens</i>            | Magnoliophyta | 1 | 0 |
| <i>Austrostipa pubinodis</i>            | Magnoliophyta | 1 | 1 |
| <i>Austrostipa pubinodis</i>            | Magnoliophyta | 1 | 1 |
| <i>Austrostipa ramosissima</i>          | Magnoliophyta | 1 | 0 |
| <i>Austrostipa rudis</i>                | Magnoliophyta | 1 | 1 |
| <i>Austrostipa scabra</i>               | Magnoliophyta | 1 | 1 |
| <i>Austrostipa semibarbata</i>          | Magnoliophyta | 1 | 1 |
| <i>Austrostipa setacea</i>              | Magnoliophyta | 1 | 0 |
| <i>Austrostipa stupos</i>               | Magnoliophyta | 1 | 1 |
| <i>Austrostipa tenuifolia</i>           | Magnoliophyta | 1 | 1 |
| <i>Austrostipa trichophylla</i>         | Magnoliophyta | 1 | 1 |
| <i>Austrostipa tuckeri</i>              | Magnoliophyta | 1 | 1 |
| <i>Austrostipa variabilis</i>           | Magnoliophyta | 1 | 0 |
| <i>Austrostipa verticillata</i>         | Magnoliophyta | 1 | 1 |
| <i>Austrostipa wakoolica</i>            | Magnoliophyta | 1 | 0 |
| <i>Avicennia marina</i>                 | Magnoliophyta | 1 | 1 |
| <i>Bactris acanthocarpa</i>             | Magnoliophyta | 0 | 1 |
| <i>Bactris bifida</i>                   | Magnoliophyta | 0 | 1 |
| <i>Bactris campestris</i>               | Magnoliophyta | 0 | 1 |
| <i>Bactris constanciae</i>              | Magnoliophyta | 0 | 1 |
| <i>Bactris ferruginea</i>               | Magnoliophyta | 0 | 1 |
| <i>Bactris gasipaes</i>                 | Magnoliophyta | 1 | 1 |
| <i>Bactris humilis</i>                  | Magnoliophyta | 1 | 0 |
| <i>Bactris killipii</i>                 | Magnoliophyta | 0 | 1 |
| <i>Bactris major</i>                    | Magnoliophyta | 0 | 1 |
| <i>Bactris maraja</i>                   | Magnoliophyta | 0 | 1 |
| <i>Bactris pliniana</i>                 | Magnoliophyta | 0 | 1 |
| <i>Bactris riparia</i>                  | Magnoliophyta | 0 | 1 |
| <i>Bactris setulosa</i>                 | Magnoliophyta | 0 | 1 |
| <i>Bactris simplicifrons</i>            | Magnoliophyta | 0 | 1 |
| <i>Balaka seemanii</i>                  | Magnoliophyta | 1 | 1 |
| <i>Bambusa vulgaris</i>                 | Magnoliophyta | 1 | 1 |
| <i>Bambusa vulgaris</i>                 | Magnoliophyta | 1 | 1 |
| <i>Barcella odora</i>                   | Magnoliophyta | 1 | 1 |
| <i>Basselinia velutina</i>              | Magnoliophyta | 1 | 1 |
| <i>Bauhinia variegata</i>               | Magnoliophyta | 1 | 1 |
| <i>Bauhinia variegata</i>               | Magnoliophyta | 1 | 1 |
| <i>Beaucarnea gracilis</i>              | Magnoliophyta | 1 | 1 |
| <i>Beccariophoenix madagascariensis</i> | Magnoliophyta | 1 | 1 |
| <i>Bentinkia nicobarica</i>             | Magnoliophyta | 1 | 1 |
| <i>Betula glandulosa</i>                | Magnoliophyta | 1 | 1 |
| <i>Biarum arundanum</i>                 | Magnoliophyta | 1 | 1 |
| <i>Biarum davisii</i>                   | Magnoliophyta | 1 | 1 |
| <i>Biarum dispar</i>                    | Magnoliophyta | 1 | 1 |
| <i>Biarum tenuifolium</i>               | Magnoliophyta | 1 | 1 |
| <i>Bismarckia nobilis</i>               | Magnoliophyta | 1 | 1 |
| <i>Bistorta vivipara</i>                | Magnoliophyta | 1 | 1 |
| <i>Borassodendron borneense</i>         | Magnoliophyta | 1 | 0 |
| <i>Borassodendron machadonis</i>        | Magnoliophyta | 1 | 1 |
| <i>Borassus aethiopum</i>               | Magnoliophyta | 1 | 1 |
| <i>Borassus akeassii</i>                | Magnoliophyta | 1 | 0 |
| <i>Borassus flabellifer</i>             | Magnoliophyta | 1 | 1 |
| <i>Borassus heineanus</i>               | Magnoliophyta | 1 | 0 |
| <i>Borassus madagascariensis</i>        | Magnoliophyta | 1 | 0 |

|                                      |               |   |   |
|--------------------------------------|---------------|---|---|
| <i>Bahea dulcis</i>                  | Magnoliophyta | 1 | 1 |
| <i>Brassica insularis</i>            | Magnoliophyta | 1 | 1 |
| <i>Brassica villosa</i>              | Magnoliophyta | 1 | 1 |
| <i>Brassiophoenix schumannii</i>     | Magnoliophyta | 1 | 1 |
| <i>Braya glabella</i>                | Magnoliophyta | 1 | 1 |
| <i>Braya humilis</i>                 | Magnoliophyta | 1 | 1 |
| <i>Bromus pumpellianus</i>           | Magnoliophyta | 1 | 1 |
| <i>Brongniartikentia lanuginosa</i>  | Magnoliophyta | 1 | 1 |
| <i>Bruguiera cylindrica</i>          | Magnoliophyta | 1 | 1 |
| <i>Burretiokentia hapala</i>         | Magnoliophyta | 1 | 1 |
| <i>Butia capitata</i>                | Magnoliophyta | 1 | 1 |
| <i>Butia eriospatha</i>              | Magnoliophyta | 1 | 0 |
| <i>Caladium bicolor</i>              | Magnoliophyta | 1 | 1 |
| <i>Calamagrostis canadensis</i>      | Magnoliophyta | 1 | 1 |
| <i>Calamagrostis deschampsoides</i>  | Magnoliophyta | 1 | 1 |
| <i>Calamagrostis lapponica</i>       | Magnoliophyta | 1 | 1 |
| <i>Calamagrostis lapponica</i>       | Magnoliophyta | 1 | 1 |
| <i>Calamagrostis purpurascens</i>    | Magnoliophyta | 1 | 1 |
| <i>Calamagrostis stricta</i>         | Magnoliophyta | 1 | 1 |
| <i>Calamus aruensis</i>              | Magnoliophyta | 0 | 1 |
| <i>Calamus caesius</i>               | Magnoliophyta | 1 | 0 |
| <i>Calamus hallrungii</i>            | Magnoliophyta | 1 | 0 |
| <i>Calla palustris</i>               | Magnoliophyta | 1 | 1 |
| <i>Calliandra tergemina</i>          | Magnoliophyta | 1 | 1 |
| <i>Calyptrocalyx albertisianus</i>   | Magnoliophyta | 1 | 1 |
| <i>Calyptrocalyx stenocrista</i>     | Magnoliophyta | 1 | 0 |
| <i>Calyptrogynne ghiesbreghtiana</i> | Magnoliophyta | 1 | 1 |
| <i>Calyptronoma occidentalis</i>     | Magnoliophyta | 1 | 1 |
| <i>Calyptronoma rivalis</i>          | Magnoliophyta | 1 | 1 |
| <i>Campecarpus fulcitus</i>          | Magnoliophyta | 1 | 1 |
| <i>Canna glauca</i>                  | Magnoliophyta | 1 | 0 |
| <i>Canna glauca</i>                  | Magnoliophyta | 1 | 0 |
| <i>Caralluma europaea</i>            | Magnoliophyta | 1 | 1 |
| <i>Cardamine digitata</i>            | Magnoliophyta | 1 | 1 |
| <i>Cardamine pratensis</i>           | Magnoliophyta | 1 | 1 |
| <i>Carex aquatilis</i>               | Magnoliophyta | 1 | 1 |
| <i>Carex atrofusca</i>               | Magnoliophyta | 1 | 1 |
| <i>Carex bicolor</i>                 | Magnoliophyta | 1 | 1 |
| <i>Carex bigelowii</i>               | Magnoliophyta | 1 | 1 |
| <i>Carex caroliniana</i>             | Magnoliophyta | 0 | 1 |
| <i>Carex chordorrhiza</i>            | Magnoliophyta | 1 | 1 |
| <i>Carex concinna</i>                | Magnoliophyta | 1 | 1 |
| <i>Carex fuliginosa</i>              | Magnoliophyta | 1 | 1 |
| <i>Carex glacialis</i>               | Magnoliophyta | 1 | 1 |
| <i>Carex glareosa</i>                | Magnoliophyta | 1 | 1 |
| <i>Carex gracillima</i>              | Magnoliophyta | 1 | 1 |
| <i>Carex granularis</i>              | Magnoliophyta | 1 | 1 |
| <i>Carex gravida</i>                 | Magnoliophyta | 0 | 1 |
| <i>Carex grayi</i>                   | Magnoliophyta | 0 | 1 |
| <i>Carex grisea</i>                  | Magnoliophyta | 0 | 1 |
| <i>Carex gynandra</i>                | Magnoliophyta | 1 | 1 |
| <i>Carex gynocrates</i>              | Magnoliophyta | 1 | 1 |
| <i>Carex gynodynama</i>              | Magnoliophyta | 0 | 1 |
| <i>Carex halleriana</i>              | Magnoliophyta | 1 | 1 |
| <i>Carex hallii</i>                  | Magnoliophyta | 0 | 1 |
| <i>Carex krausei</i>                 | Magnoliophyta | 1 | 1 |
| <i>Carex lachenalii</i>              | Magnoliophyta | 1 | 1 |
| <i>Carex marina</i>                  | Magnoliophyta | 1 | 1 |
| <i>Carex maritima</i>                | Magnoliophyta | 1 | 1 |
| <i>Carex membranacea</i>             | Magnoliophyta | 1 | 1 |
| <i>Carex nardina</i>                 | Magnoliophyta | 1 | 1 |
| <i>Carex norvegica</i>               | Magnoliophyta | 1 | 1 |
| <i>Carex petricosa</i>               | Magnoliophyta | 1 | 1 |
| <i>Carex rariflora</i>               | Magnoliophyta | 1 | 1 |
| <i>Carex rotundata</i>               | Magnoliophyta | 1 | 1 |
| <i>Carex rupestris</i>               | Magnoliophyta | 1 | 1 |
| <i>Carex scirpoidea</i>              | Magnoliophyta | 1 | 1 |
| <i>Carex subspathacea</i>            | Magnoliophyta | 1 | 1 |
| <i>Carex supina</i>                  | Magnoliophyta | 1 | 1 |
| <i>Carex ursina</i>                  | Magnoliophyta | 1 | 1 |
| <i>Carex vaginata</i>                | Magnoliophyta | 1 | 1 |
| <i>Carpentaria acuminata</i>         | Magnoliophyta | 1 | 1 |
| <i>Carpoxylon macrospermum</i>       | Magnoliophyta | 1 | 1 |
| <i>Caryota kiriwongensis</i>         | Magnoliophyta | 1 | 1 |
| <i>Caryota maxima</i>                | Magnoliophyta | 1 | 1 |
| <i>Caryota mitis</i>                 | Magnoliophyta | 1 | 1 |
| <i>Caryota monostachya</i>           | Magnoliophyta | 1 | 1 |
| <i>Caryota obtusa</i>                | Magnoliophyta | 1 | 1 |
| <i>Caryota ophiopellis</i>           | Magnoliophyta | 1 | 1 |
| <i>Caryota rumphiana</i>             | Magnoliophyta | 1 | 1 |
| <i>Caryota urens</i>                 | Magnoliophyta | 1 | 1 |

|                                     |               |   |   |
|-------------------------------------|---------------|---|---|
| <i>Caryota urens</i>                | Magnoliophyta | 1 | 1 |
| <i>Caryota urens</i>                | Magnoliophyta | 1 | 1 |
| <i>Cassiopa tetragona</i>           | Magnoliophyta | 1 | 1 |
| <i>Castilleja elegans</i>           | Magnoliophyta | 1 | 1 |
| <i>Cerastium arcticum</i>           | Magnoliophyta | 1 | 1 |
| <i>Cerastium beeringianum</i>       | Magnoliophyta | 1 | 1 |
| <i>Ceriops tagal</i>                | Magnoliophyta | 1 | 1 |
| <i>Ceroxylon alpinum</i>            | Magnoliophyta | 1 | 1 |
| <i>Ceroxylon amazonicum</i>         | Magnoliophyta | 0 | 1 |
| <i>Ceroxylon echinulatum</i>        | Magnoliophyta | 1 | 1 |
| <i>Ceroxylon parvifrons</i>         | Magnoliophyta | 0 | 1 |
| <i>Ceroxylon parvum</i>             | Magnoliophyta | 0 | 1 |
| <i>Ceroxylon quindiuense</i>        | Magnoliophyta | 1 | 1 |
| <i>Ceroxylon ventricosum</i>        | Magnoliophyta | 0 | 1 |
| <i>Ceroxylon vogelianum</i>         | Magnoliophyta | 0 | 1 |
| <i>Cestrum nocturnum</i>            | Magnoliophyta | 1 | 1 |
| <i>Cestrum nocturnum</i>            | Magnoliophyta | 1 | 1 |
| <i>Chamaedorea adscendens</i>       | Magnoliophyta | 0 | 1 |
| <i>Chamaedorea allenii</i>          | Magnoliophyta | 0 | 1 |
| <i>Chamaedorea alternans</i>        | Magnoliophyta | 0 | 1 |
| <i>Chamaedorea brachypoda</i>       | Magnoliophyta | 0 | 1 |
| <i>Chamaedorea costaricana</i>      | Magnoliophyta | 0 | 1 |
| <i>Chamaedorea crucensis</i>        | Magnoliophyta | 0 | 1 |
| <i>Chamaedorea dammeriana</i>       | Magnoliophyta | 0 | 1 |
| <i>Chamaedorea elatior</i>          | Magnoliophyta | 0 | 1 |
| <i>Chamaedorea ernesti-augustii</i> | Magnoliophyta | 0 | 1 |
| <i>Chamaedorea fragrans</i>         | Magnoliophyta | 0 | 1 |
| <i>Chamaedorea geonomiformis</i>    | Magnoliophyta | 0 | 1 |
| <i>Chamaedorea glaucifolia</i>      | Magnoliophyta | 0 | 1 |
| <i>Chamaedorea hooperiana</i>       | Magnoliophyta | 0 | 1 |
| <i>Chamaedorea klotzschiana</i>     | Magnoliophyta | 0 | 1 |
| <i>Chamaedorea linearis</i>         | Magnoliophyta | 0 | 1 |
| <i>Chamaedorea metallica</i>        | Magnoliophyta | 0 | 1 |
| <i>Chamaedorea microspadix</i>      | Magnoliophyta | 1 | 1 |
| <i>Chamaedorea nationsiana</i>      | Magnoliophyta | 0 | 1 |
| <i>Chamaedorea neurochlamys</i>     | Magnoliophyta | 0 | 1 |
| <i>Chamaedorea oblongata</i>        | Magnoliophyta | 0 | 1 |
| <i>Chamaedorea pedunculata</i>      | Magnoliophyta | 0 | 1 |
| <i>Chamaedorea pinnatifrons</i>     | Magnoliophyta | 0 | 1 |
| <i>Chamaedorea plumosa</i>          | Magnoliophyta | 0 | 1 |
| <i>Chamaedorea pochutlensis</i>     | Magnoliophyta | 0 | 1 |
| <i>Chamaedorea schiedeana</i>       | Magnoliophyta | 0 | 1 |
| <i>Chamaedorea seifrizii</i>        | Magnoliophyta | 1 | 1 |
| <i>Chamaedorea stolonifera</i>      | Magnoliophyta | 0 | 1 |
| <i>Chamaedorea tenella</i>          | Magnoliophyta | 0 | 1 |
| <i>Chamaedorea tepejilote</i>       | Magnoliophyta | 0 | 1 |
| <i>Chamaerops humilis</i>           | Magnoliophyta | 1 | 1 |
| <i>Chambeyronia macrocarpa</i>      | Magnoliophyta | 1 | 1 |
| <i>Chamerion latifolium</i>         | Magnoliophyta | 1 | 1 |
| <i>Chelyocarpus repens</i>          | Magnoliophyta | 1 | 0 |
| <i>Chelyocarpus ulei</i>            | Magnoliophyta | 1 | 1 |
| <i>Chortolirion angolense</i>       | Magnoliophyta | 1 | 1 |
| <i>Chuniophoenix hainanensis</i>    | Magnoliophyta | 1 | 0 |
| <i>Chuniophoenix nana</i>           | Magnoliophyta | 1 | 1 |
| <i>Clinosperma bracteale</i>        | Magnoliophyta | 1 | 1 |
| <i>Clinostigma savoryanum</i>       | Magnoliophyta | 1 | 1 |
| <i>Coccothrinax argentata</i>       | Magnoliophyta | 1 | 1 |
| <i>Cochlearia groenlandica</i>      | Magnoliophyta | 1 | 1 |
| <i>Codiaeum variegatum</i>          | Magnoliophyta | 1 | 1 |
| <i>Colocasia antiquorum</i>         | Magnoliophyta | 1 | 1 |
| <i>Colocasia esculenta</i>          | Magnoliophyta | 1 | 1 |
| <i>Colocasia heterochroma</i>       | Magnoliophyta | 1 | 1 |
| <i>Colocasia lihengiae</i>          | Magnoliophyta | 1 | 1 |
| <i>Colocasia yunnanensis</i>        | Magnoliophyta | 1 | 1 |
| <i>Colpothrinax wrightii</i>        | Magnoliophyta | 1 | 1 |
| <i>Copernicia prunifera</i>         | Magnoliophyta | 1 | 1 |
| <i>Cordyline fruticosa</i>          | Magnoliophyta | 1 | 1 |
| <i>Cordyline fruticosa</i>          | Magnoliophyta | 1 | 1 |
| <i>Corypha taliera</i>              | Magnoliophyta | 1 | 1 |
| <i>Corypha umbraculifera</i>        | Magnoliophyta | 1 | 1 |
| <i>Corypha utan</i>                 | Magnoliophyta | 1 | 0 |
| <i>Couroupita guianensis</i>        | Magnoliophyta | 1 | 1 |
| <i>Cryosophila warszewiczii</i>     | Magnoliophyta | 0 | 1 |
| <i>Cryptocoryne sinensis</i>        | Magnoliophyta | 1 | 0 |
| <i>Cyclopia genistoides</i>         | Magnoliophyta | 1 | 1 |
| <i>Cyphokentia macrostachya</i>     | Magnoliophyta | 1 | 1 |
| <i>Cyphophoenix nucele</i>          | Magnoliophyta | 1 | 1 |
| <i>Cyphosperma balansae</i>         | Magnoliophyta | 1 | 1 |
| <i>Cyrtostachys renda</i>           | Magnoliophyta | 1 | 1 |
| <i>Dendrobium loddigesii</i>        | Magnoliophyta | 1 | 1 |
| <i>Dendrobium macraei</i>           | Magnoliophyta | 1 | 1 |

|                                  |               |   |   |
|----------------------------------|---------------|---|---|
| <i>Dendrobium macrostachyum</i>  | Magnoliophyta | 1 | 1 |
| <i>Dendrobium microbulbon</i>    | Magnoliophyta | 1 | 1 |
| <i>Dendrobium miyakei</i>        | Magnoliophyta | 1 | 1 |
| <i>Dendrobium moniliforme</i>    | Magnoliophyta | 1 | 1 |
| <i>Dendrobium moschatum</i>      | Magnoliophyta | 1 | 1 |
| <i>Dendrobium nobile</i>         | Magnoliophyta | 1 | 1 |
| <i>Dendrobium nodosum</i>        | Magnoliophyta | 1 | 1 |
| <i>Dendrobium nutantiflorum</i>  | Magnoliophyta | 1 | 1 |
| <i>Dendrobium ochreatum</i>      | Magnoliophyta | 1 | 1 |
| <i>Dendrobium officinale</i>     | Magnoliophyta | 1 | 1 |
| <i>Dendrobium ovatum</i>         | Magnoliophyta | 1 | 1 |
| <i>Deschampsia brevifolia</i>    | Magnoliophyta | 1 | 1 |
| <i>Deschampsia cespitosa</i>     | Magnoliophyta | 1 | 1 |
| <i>Deschampsia sukatschewii</i>  | Magnoliophyta | 1 | 1 |
| <i>Desmoncus mitis</i>           | Magnoliophyta | 0 | 1 |
| <i>Desmoncus orthacanthos</i>    | Magnoliophyta | 1 | 1 |
| <i>Desmoncus polyacanthos</i>    | Magnoliophyta | 0 | 1 |
| <i>Dianthus busambræ</i>         | Magnoliophyta | 1 | 0 |
| <i>Dianthus rupicola</i>         | Magnoliophyta | 1 | 1 |
| <i>Dictyocaryum lamarckianum</i> | Magnoliophyta | 1 | 1 |
| <i>Dictyosperma album</i>        | Magnoliophyta | 1 | 1 |
| <i>Diospyros vestita</i>         | Magnoliophyta | 1 | 1 |
| <i>Diospyros vieillardii</i>     | Magnoliophyta | 1 | 1 |
| <i>Diospyros wallichii</i>       | Magnoliophyta | 1 | 1 |
| <i>Diospyros yaouhensis</i>      | Magnoliophyta | 1 | 1 |
| <i>Doryanthes palmeri</i>        | Magnoliophyta | 1 | 1 |
| <i>Draba cinerea</i>             | Magnoliophyta | 1 | 1 |
| <i>Draba corymbosa</i>           | Magnoliophyta | 1 | 1 |
| <i>Draba glabella</i>            | Magnoliophyta | 1 | 1 |
| <i>Draba nivalis</i>             | Magnoliophyta | 1 | 1 |
| <i>Draba oblongata</i>           | Magnoliophyta | 1 | 1 |
| <i>Draba pilosa</i>              | Magnoliophyta | 1 | 1 |
| <i>Dracaena fragrans</i>         | Magnoliophyta | 1 | 0 |
| <i>Dracaena fragrans</i>         | Magnoliophyta | 1 | 0 |
| <i>Dracunculus canariensis</i>   | Magnoliophyta | 1 | 1 |
| <i>Dracunculus vulgaris</i>      | Magnoliophyta | 1 | 1 |
| <i>Dransfieldia micrantha</i>    | Magnoliophyta | 1 | 1 |
| <i>Dryas integrifolia</i>        | Magnoliophyta | 1 | 1 |
| <i>Drymophloeus litigiosus</i>   | Magnoliophyta | 1 | 1 |
| <i>Dupontia fisheri</i>          | Magnoliophyta | 1 | 1 |
| <i>Duranta erecta</i>            | Magnoliophyta | 1 | 1 |
| <i>Duranta erecta</i>            | Magnoliophyta | 1 | 1 |
| <i>Dypsis lastelliana</i>        | Magnoliophyta | 1 | 0 |
| <i>Dypsis lutescens</i>          | Magnoliophyta | 1 | 1 |
| <i>Echinochloa frumentacea</i>   | Magnoliophyta | 1 | 1 |
| <i>Elaeis oleifera</i>           | Magnoliophyta | 1 | 1 |
| <i>Eleocharis acicularis</i>     | Magnoliophyta | 1 | 1 |
| <i>Eleusine coracana</i>         | Magnoliophyta | 1 | 1 |
| <i>Elymus alaskanus</i>          | Magnoliophyta | 1 | 1 |
| <i>Elymus macrourus</i>          | Magnoliophyta | 1 | 1 |
| <i>Elymus violaceus</i>          | Magnoliophyta | 1 | 1 |
| <i>Eminium spiculatum</i>        | Magnoliophyta | 1 | 1 |
| <i>Empetrum nigrum</i>           | Magnoliophyta | 1 | 1 |
| <i>Empodium veratrifolium</i>    | Magnoliophyta | 1 | 1 |
| <i>Epilobium arcticum</i>        | Magnoliophyta | 1 | 1 |
| <i>Epipremnum aureum</i>         | Magnoliophyta | 1 | 1 |
| <i>Epipremnum aureum</i>         | Magnoliophyta | 1 | 1 |
| <i>Eremospatha wendlandiana</i>  | Magnoliophyta | 1 | 1 |
| <i>Erigeron compositus</i>       | Magnoliophyta | 1 | 1 |
| <i>Eriophorum angustifolium</i>  | Magnoliophyta | 1 | 1 |
| <i>Eriophorum brachyantherum</i> | Magnoliophyta | 1 | 1 |
| <i>Eriophorum callitrix</i>      | Magnoliophyta | 1 | 1 |
| <i>Eriophorum chamissonis</i>    | Magnoliophyta | 1 | 1 |
| <i>Eriophorum scheuchzeri</i>    | Magnoliophyta | 1 | 1 |
| <i>Eriophorum triste</i>         | Magnoliophyta | 1 | 1 |
| <i>Eriophorum vaginatum</i>      | Magnoliophyta | 1 | 1 |
| <i>Erysimum pallasii</i>         | Magnoliophyta | 1 | 1 |
| <i>Eugeissona tristis</i>        | Magnoliophyta | 1 | 1 |
| <i>Euterpe oleracea</i>          | Magnoliophyta | 1 | 1 |
| <i>Eutrema edwardsii</i>         | Magnoliophyta | 1 | 1 |
| <i>Festuca altaica</i>           | Magnoliophyta | 1 | 1 |
| <i>Festuca baffinensis</i>       | Magnoliophyta | 1 | 1 |
| <i>Festuca brachyphylla</i>      | Magnoliophyta | 1 | 1 |
| <i>Festuca brevisima</i>         | Magnoliophyta | 1 | 1 |
| <i>Festuca edlundiae</i>         | Magnoliophyta | 1 | 1 |
| <i>Festuca hyperborea</i>        | Magnoliophyta | 1 | 1 |
| <i>Festuca lenensis</i>          | Magnoliophyta | 1 | 1 |
| <i>Festuca rubra</i>             | Magnoliophyta | 1 | 1 |
| <i>Festuca viviparoides</i>      | Magnoliophyta | 1 | 1 |
| <i>Ficus benamina</i>            | Magnoliophyta | 1 | 1 |
| <i>Ficus benamina</i>            | Magnoliophyta | 1 | 1 |

|                                     |               |   |   |
|-------------------------------------|---------------|---|---|
| <i>Filarum manserichense</i>        | Magnoliophyta | 1 | 1 |
| <i>Gardenia jasminoides</i>         | Magnoliophyta | 1 | 1 |
| <i>Gastrococos crista</i>           | Magnoliophyta | 1 | 1 |
| <i>Gaussia attenuata</i>            | Magnoliophyta | 1 | 1 |
| <i>Gaussia gomez-pompae</i>         | Magnoliophyta | 0 | 1 |
| <i>Gaussia maya</i>                 | Magnoliophyta | 1 | 1 |
| <i>Gaussia spirituana</i>           | Magnoliophyta | 0 | 1 |
| <i>Genista demarcoi</i>             | Magnoliophyta | 1 | 1 |
| <i>Genista madoniensis</i>          | Magnoliophyta | 1 | 0 |
| <i>Geonoma congesta</i>             | Magnoliophyta | 1 | 1 |
| <i>Geonoma oxycarpa</i>             | Magnoliophyta | 1 | 0 |
| <i>Gladiolus marlothii</i>          | Magnoliophyta | 0 | 1 |
| <i>Gladiolus martleyi</i>           | Magnoliophyta | 0 | 1 |
| <i>Gladiolus meliusculus</i>        | Magnoliophyta | 0 | 1 |
| <i>Gladiolus meridionalis</i>       | Magnoliophyta | 0 | 1 |
| <i>Gladiolus microcarpus</i>        | Magnoliophyta | 0 | 1 |
| <i>Glandularia pulchella</i>        | Magnoliophyta | 1 | 0 |
| <i>Glandularia pulchella</i>        | Magnoliophyta | 1 | 0 |
| <i>Gonatopus angustus</i>           | Magnoliophyta | 1 | 1 |
| <i>Grevillea robusta</i>            | Magnoliophyta | 1 | 1 |
| <i>Grevillea robusta</i>            | Magnoliophyta | 1 | 1 |
| <i>Guihaia argyrata</i>             | Magnoliophyta | 1 | 1 |
| <i>Gymnostachys anceps</i>          | Magnoliophyta | 1 | 1 |
| <i>Halerpestes cymbalaria</i>       | Magnoliophyta | 1 | 1 |
| <i>Hamelia patens</i>               | Magnoliophyta | 1 | 1 |
| <i>Haworthia angustifolia</i>       | Magnoliophyta | 1 | 1 |
| <i>Haworthia arachnoidea</i>        | Magnoliophyta | 1 | 1 |
| <i>Haworthia arachnoidea</i>        | Magnoliophyta | 1 | 1 |
| <i>Haworthia aristata</i>           | Magnoliophyta | 1 | 1 |
| <i>Haworthia attenuata</i>          | Magnoliophyta | 1 | 1 |
| <i>Haworthia bayeri</i>             | Magnoliophyta | 1 | 1 |
| <i>Haworthia blackburniae</i>       | Magnoliophyta | 1 | 1 |
| <i>Haworthia bolusii</i>            | Magnoliophyta | 1 | 1 |
| <i>Haworthia bruynsii</i>           | Magnoliophyta | 1 | 1 |
| <i>Haworthia chloracantha</i>       | Magnoliophyta | 1 | 1 |
| <i>Haworthia coarctata</i>          | Magnoliophyta | 1 | 1 |
| <i>Haworthia cooperi</i>            | Magnoliophyta | 1 | 1 |
| <i>Haworthia cymbiformis</i>        | Magnoliophyta | 1 | 1 |
| <i>Haworthia decipiens</i>          | Magnoliophyta | 1 | 1 |
| <i>Haworthia emelyae</i>            | Magnoliophyta | 1 | 1 |
| <i>Haworthia fasciata</i>           | Magnoliophyta | 1 | 1 |
| <i>Haworthia floribunda</i>         | Magnoliophyta | 1 | 1 |
| <i>Haworthia glauca</i>             | Magnoliophyta | 1 | 1 |
| <i>Haworthia gracilis</i>           | Magnoliophyta | 1 | 1 |
| <i>Haworthia herbacea</i>           | Magnoliophyta | 1 | 1 |
| <i>Haworthia kingiana</i>           | Magnoliophyta | 1 | 1 |
| <i>Haworthia koelmaniorum</i>       | Magnoliophyta | 1 | 1 |
| <i>Haworthia limifolia</i>          | Magnoliophyta | 1 | 1 |
| <i>Haworthia limifolia</i>          | Magnoliophyta | 1 | 1 |
| <i>Haworthia lockwoodii</i>         | Magnoliophyta | 1 | 1 |
| <i>Haworthia longiana</i>           | Magnoliophyta | 1 | 1 |
| <i>Haworthia maculata</i>           | Magnoliophyta | 1 | 1 |
| <i>Haworthia magnifica</i>          | Magnoliophyta | 1 | 1 |
| <i>Haworthia marumiana</i>          | Magnoliophyta | 1 | 1 |
| <i>Haworthia marxii</i>             | Magnoliophyta | 1 | 1 |
| <i>Haworthia minor</i>              | Magnoliophyta | 1 | 1 |
| <i>Haworthia mirabilis</i>          | Magnoliophyta | 1 | 1 |
| <i>Haworthia mirabilis</i>          | Magnoliophyta | 0 | 1 |
| <i>Haworthia monticola</i>          | Magnoliophyta | 1 | 1 |
| <i>Haworthia mucronata</i>          | Magnoliophyta | 1 | 1 |
| <i>Haworthia mutica</i>             | Magnoliophyta | 1 | 1 |
| <i>Haworthia nigra</i>              | Magnoliophyta | 1 | 1 |
| <i>Haworthia nortieri</i>           | Magnoliophyta | 1 | 1 |
| <i>Haworthia outeniquensis</i>      | Magnoliophyta | 1 | 1 |
| <i>Haworthia parksiana</i>          | Magnoliophyta | 1 | 1 |
| <i>Haworthia pubescens</i>          | Magnoliophyta | 1 | 1 |
| <i>Haworthia pulchella</i>          | Magnoliophyta | 1 | 1 |
| <i>Haworthia pumila</i>             | Magnoliophyta | 1 | 1 |
| <i>Haworthia pygmaea</i>            | Magnoliophyta | 1 | 1 |
| <i>Haworthia reinwardtii</i>        | Magnoliophyta | 1 | 1 |
| <i>Haworthia reticulata</i>         | Magnoliophyta | 1 | 1 |
| <i>Haworthia retusa</i>             | Magnoliophyta | 1 | 1 |
| <i>Haworthia scabra</i>             | Magnoliophyta | 1 | 1 |
| <i>Haworthia semiviva</i>           | Magnoliophyta | 1 | 1 |
| <i>Haworthia sordida</i>            | Magnoliophyta | 1 | 1 |
| <i>Haworthia springbokvlakensis</i> | Magnoliophyta | 1 | 1 |
| <i>Haworthia truncata</i>           | Magnoliophyta | 1 | 1 |
| <i>Haworthia variegata</i>          | Magnoliophyta | 1 | 1 |
| <i>Haworthia venosa</i>             | Magnoliophyta | 1 | 1 |
| <i>Haworthia vlokii</i>             | Magnoliophyta | 1 | 1 |
| <i>Haworthia wittebergensis</i>     | Magnoliophyta | 1 | 1 |



|                                      |               |   |   |
|--------------------------------------|---------------|---|---|
| <i>Haworthia zantneriana</i>         | Magnoliophyta | 1 | 1 |
| <i>Hedera helix</i>                  | Magnoliophyta | 1 | 1 |
| <i>Hedysarum americanum</i>          | Magnoliophyta | 1 | 1 |
| <i>Hedysarum boreale</i>             | Magnoliophyta | 1 | 1 |
| <i>Hedyscepe canterburyana</i>       | Magnoliophyta | 1 | 1 |
| <i>Helichrysum hyblaenum</i>         | Magnoliophyta | 1 | 1 |
| <i>Helicodiceros muscivorus</i>      | Magnoliophyta | 1 | 1 |
| <i>Heliconia collinsiana</i>         | Magnoliophyta | 1 | 1 |
| <i>Hemithrinax compacta</i>          | Magnoliophyta | 1 | 1 |
| <i>Heterospathe elata</i>            | Magnoliophyta | 1 | 1 |
| <i>Heterospathe longipes</i>         | Magnoliophyta | 1 | 1 |
| <i>Hieracium cophanense</i>          | Magnoliophyta | 1 | 1 |
| <i>Hippuris lanceolata</i>           | Magnoliophyta | 1 | 1 |
| <i>Homalomena speariae</i>           | Magnoliophyta | 1 | 1 |
| <i>Homalomena speariae</i>           | Magnoliophyta | 1 | 1 |
| <i>Honckenya peploides</i>           | Magnoliophyta | 1 | 1 |
| <i>Hordeum jubatum</i>               | Magnoliophyta | 1 | 1 |
| <i>Howea belmoreana</i>              | Magnoliophyta | 1 | 1 |
| <i>Howea forsteriana</i>             | Magnoliophyta | 1 | 1 |
| <i>Hulteniella integrifolia</i>      | Magnoliophyta | 1 | 1 |
| <i>Hydriastele chaunostachys</i>     | Magnoliophyta | 1 | 1 |
| <i>Hydriastele costata</i>           | Magnoliophyta | 1 | 0 |
| <i>Hydriastele microspadix</i>       | Magnoliophyta | 1 | 1 |
| <i>Hydriastele pinangoides</i>       | Magnoliophyta | 1 | 0 |
| <i>Hydriastele wendlandiana</i>      | Magnoliophyta | 1 | 0 |
| <i>Hyophorbe amaricaulis</i>         | Magnoliophyta | 0 | 1 |
| <i>Hyophorbe indica</i>              | Magnoliophyta | 0 | 1 |
| <i>Hyophorbe lagenicaulis</i>        | Magnoliophyta | 1 | 1 |
| <i>Hyophorbe vaughanii</i>           | Magnoliophyta | 0 | 1 |
| <i>Hyophorbe verschaffeltii</i>      | Magnoliophyta | 0 | 1 |
| <i>Hyospathe macrorrhachis</i>       | Magnoliophyta | 1 | 1 |
| <i>Hyphaene coriacea</i>             | Magnoliophyta | 1 | 1 |
| <i>Hyphaene dichotoma</i>            | Magnoliophyta | 1 | 0 |
| <i>Hyphaene petersiana</i>           | Magnoliophyta | 1 | 1 |
| <i>Hyphaene thebaica</i>             | Magnoliophyta | 1 | 1 |
| <i>Hypoxidia rhizophylla</i>         | Magnoliophyta | 1 | 0 |
| <i>Hypoxis leptocarpa</i>            | Magnoliophyta | 1 | 1 |
| <i>Iguanura wallichiana</i>          | Magnoliophyta | 1 | 1 |
| <i>Iriartea deltoidea</i>            | Magnoliophyta | 1 | 1 |
| <i>Iriartella stenocarpa</i>         | Magnoliophyta | 1 | 1 |
| <i>Itaya amicornum</i>               | Magnoliophyta | 1 | 1 |
| <i>Johannesteijsmannia altifrons</i> | Magnoliophyta | 1 | 1 |
| <i>Juania australis</i>              | Magnoliophyta | 1 | 1 |
| <i>Jubaea chilensis</i>              | Magnoliophyta | 1 | 1 |
| <i>Jubaeopsis caffra</i>             | Magnoliophyta | 1 | 1 |
| <i>Juncus arcticus</i>               | Magnoliophyta | 1 | 0 |
| <i>Juncus biglumis</i>               | Magnoliophyta | 1 | 0 |
| <i>Juncus castaneus</i>              | Magnoliophyta | 1 | 0 |
| <i>Juncus dudleyi</i>                | Magnoliophyta | 1 | 0 |
| <i>Juncus trifidus</i>               | Magnoliophyta | 1 | 1 |
| <i>Juncus triglumis</i>              | Magnoliophyta | 1 | 1 |
| <i>Kentiopsis oliviformis</i>        | Magnoliophyta | 1 | 1 |
| <i>Kerriodoxa elegans</i>            | Magnoliophyta | 1 | 1 |
| <i>Kobresia myosuroides</i>          | Magnoliophyta | 1 | 1 |
| <i>Kobresia sibirica</i>             | Magnoliophyta | 1 | 1 |
| <i>Kobresia simpliciuscula</i>       | Magnoliophyta | 1 | 1 |
| <i>Koeleria asiatica</i>             | Magnoliophyta | 1 | 1 |
| <i>Korthalsia cheb</i>               | Magnoliophyta | 1 | 1 |
| <i>Laccospadix australasica</i>      | Magnoliophyta | 1 | 1 |
| <i>Laccosperma acutiflorum</i>       | Magnoliophyta | 1 | 1 |
| <i>Lanaria lanata</i>                | Magnoliophyta | 1 | 1 |
| <i>Landoltia punctata</i>            | Magnoliophyta | 1 | 1 |
| <i>Lasia spinosa</i>                 | Magnoliophyta | 1 | 1 |
| <i>Latania loddigesii</i>            | Magnoliophyta | 1 | 0 |
| <i>Latania lontaroides</i>           | Magnoliophyta | 1 | 0 |
| <i>Latania verschaffeltii</i>        | Magnoliophyta | 1 | 1 |
| <i>Lathyrus japonicus</i>            | Magnoliophyta | 1 | 1 |
| <i>Laurus nobilis</i>                | Magnoliophyta | 1 | 1 |
| <i>Lavoixia macrocarpa</i>           | Magnoliophyta | 1 | 1 |
| <i>Lemna aequinoctialis</i>          | Magnoliophyta | 1 | 1 |
| <i>Lemna disperma</i>                | Magnoliophyta | 1 | 1 |
| <i>Lemna ecuadoriensis</i>           | Magnoliophyta | 1 | 1 |
| <i>Lemna gibba</i>                   | Magnoliophyta | 1 | 1 |
| <i>Lemna japonica</i>                | Magnoliophyta | 1 | 1 |
| <i>Lemna minor</i>                   | Magnoliophyta | 1 | 1 |
| <i>Lemna minuta</i>                  | Magnoliophyta | 1 | 1 |
| <i>Lemna obscura</i>                 | Magnoliophyta | 1 | 1 |
| <i>Lemna perpusilla</i>              | Magnoliophyta | 1 | 1 |
| <i>Lemna tenera</i>                  | Magnoliophyta | 1 | 1 |
| <i>Lemna trisulca</i>                | Magnoliophyta | 1 | 1 |
| <i>Lemna turionifera</i>             | Magnoliophyta | 1 | 1 |

|                                  |               |   |   |
|----------------------------------|---------------|---|---|
| <i>Lemna valdiviana</i>          | Magnoliophyta | 1 | 1 |
| <i>Lemna yungensis</i>           | Magnoliophyta | 1 | 1 |
| <i>Lemurophoenix halleuxii</i>   | Magnoliophyta | 1 | 1 |
| <i>Leopoldinia pulchra</i>       | Magnoliophyta | 1 | 1 |
| <i>Lepidorrhachis mooreana</i>   | Magnoliophyta | 1 | 1 |
| <i>Leucocasia gigantea</i>       | Magnoliophyta | 1 | 1 |
| <i>Leymus mollis</i>             | Magnoliophyta | 1 | 1 |
| <i>Licuala beccariana</i>        | Magnoliophyta | 1 | 1 |
| <i>Licuala grandis</i>           | Magnoliophyta | 1 | 1 |
| <i>Licuala kunstleri</i>         | Magnoliophyta | 1 | 1 |
| <i>Limonium lopadusanum</i>      | Magnoliophyta | 1 | 0 |
| <i>Limonium panormitanum</i>     | Magnoliophyta | 1 | 0 |
| <i>Linaria reflexa</i>           | Magnoliophyta | 0 | 1 |
| <i>Linospadix monostachya</i>    | Magnoliophyta | 1 | 1 |
| <i>Liparia hirsuta</i>           | Magnoliophyta | 1 | 1 |
| <i>Liparia myrtifolia</i>        | Magnoliophyta | 1 | 1 |
| <i>Liparia rafnioides</i>        | Magnoliophyta | 1 | 1 |
| <i>Liriodendron tulipifera</i>   | Magnoliophyta | 1 | 1 |
| <i>Livistona chinensis</i>       | Magnoliophyta | 1 | 1 |
| <i>Livistona speciosa</i>        | Magnoliophyta | 1 | 0 |
| <i>Lobelia sonderiana</i>        | Magnoliophyta | 1 | 0 |
| <i>Lobelia stricta</i>           | Magnoliophyta | 1 | 0 |
| <i>Lobelia tomentosa</i>         | Magnoliophyta | 1 | 0 |
| <i>Lobelia tupa</i>              | Magnoliophyta | 1 | 0 |
| <i>Lodoicea maldivica</i>        | Magnoliophyta | 1 | 1 |
| <i>Lomatogonium rotatum</i>      | Magnoliophyta | 1 | 1 |
| <i>Loxococcus rupicola</i>       | Magnoliophyta | 1 | 1 |
| <i>Lupinus arcticus</i>          | Magnoliophyta | 1 | 1 |
| <i>Luzula arcuata</i>            | Magnoliophyta | 1 | 0 |
| <i>Luzula confusa</i>            | Magnoliophyta | 1 | 0 |
| <i>Luzula kjellmaniana</i>       | Magnoliophyta | 1 | 0 |
| <i>Luzula multiflora</i>         | Magnoliophyta | 1 | 1 |
| <i>Luzula rufescens</i>          | Magnoliophyta | 1 | 0 |
| <i>Luzula wahlenbergii</i>       | Magnoliophyta | 1 | 1 |
| <i>Lytocaryum weddellianum</i>   | Magnoliophyta | 1 | 1 |
| <i>Magnolia virginiana</i>       | Magnoliophyta | 1 | 1 |
| <i>Manicaria saccifera</i>       | Magnoliophyta | 1 | 1 |
| <i>Marojejya darianii</i>        | Magnoliophyta | 1 | 1 |
| <i>Marojejya insignis</i>        | Magnoliophyta | 1 | 1 |
| <i>Masoala kona</i>              | Magnoliophyta | 1 | 1 |
| <i>Masoala madagascariensis</i>  | Magnoliophyta | 1 | 1 |
| <i>Mauritia flexuosa</i>         | Magnoliophyta | 1 | 1 |
| <i>Maxburretia rupicola</i>      | Magnoliophyta | 1 | 1 |
| <i>Michelia champaca</i>         | Magnoliophyta | 1 | 0 |
| <i>Micranthes nivalis</i>        | Magnoliophyta | 1 | 1 |
| <i>Minuartia rubella</i>         | Magnoliophyta | 1 | 1 |
| <i>Minuartia stricta</i>         | Magnoliophyta | 1 | 1 |
| <i>Molineria capitulata</i>      | Magnoliophyta | 1 | 1 |
| <i>Montrichardia arborescens</i> | Magnoliophyta | 1 | 1 |
| <i>Musa campestris</i>           | Magnoliophyta | 1 | 1 |
| <i>Musa chunii</i>               | Magnoliophyta | 1 | 1 |
| <i>Musa coccinea</i>             | Magnoliophyta | 1 | 1 |
| <i>Musa hirta</i>                | Magnoliophyta | 1 | 1 |
| <i>Musa ingens</i>               | Magnoliophyta | 1 | 1 |
| <i>Myriophyllum sibiricum</i>    | Magnoliophyta | 1 | 1 |
| <i>Nassella tenuissima</i>       | Magnoliophyta | 1 | 1 |
| <i>Nyctanthes arbor-tristis</i>  | Magnoliophyta | 1 | 1 |
| <i>Odontonema tubaeforme</i>     | Magnoliophyta | 1 | 0 |
| <i>Oncidium retusum</i>          | Magnoliophyta | 0 | 1 |
| <i>Oncidium reversoides</i>      | Magnoliophyta | 0 | 1 |
| <i>Oncidium roseoides</i>        | Magnoliophyta | 0 | 1 |
| <i>Oncidium sceptrum</i>         | Magnoliophyta | 0 | 1 |
| <i>Oncidium schroederianum</i>   | Magnoliophyta | 0 | 1 |
| <i>Oncidium serratum</i>         | Magnoliophyta | 1 | 1 |
| <i>Oncidium spectatissimum</i>   | Magnoliophyta | 0 | 1 |
| <i>Oncidium sphacelatum</i>      | Magnoliophyta | 0 | 1 |
| <i>Oncidium stenobulbon</i>      | Magnoliophyta | 0 | 1 |
| <i>Oncidium stenoglossum</i>     | Magnoliophyta | 0 | 1 |
| <i>Oncidium storkii</i>          | Magnoliophyta | 0 | 1 |
| <i>Oncidium tenuoides</i>        | Magnoliophyta | 0 | 1 |
| <i>Oncidium toachicum</i>        | Magnoliophyta | 1 | 1 |
| <i>Oncidium trinasutum</i>       | Magnoliophyta | 0 | 1 |
| <i>Oncostema dimartinoi</i>      | Magnoliophyta | 1 | 0 |
| <i>Oncostema hughii</i>          | Magnoliophyta | 1 | 1 |
| <i>Orontium aquaticum</i>        | Magnoliophyta | 1 | 1 |
| <i>Orthilia secunda</i>          | Magnoliophyta | 1 | 1 |
| <i>Oxalis acetosella</i>         | Magnoliophyta | 1 | 1 |
| <i>Oxyria digyna</i>             | Magnoliophyta | 1 | 1 |
| <i>Oxytropis arctica</i>         | Magnoliophyta | 1 | 1 |
| <i>Oxytropis arctobia</i>        | Magnoliophyta | 1 | 1 |
| <i>Oxytropis bellii</i>          | Magnoliophyta | 1 | 1 |

|                                     |               |   |   |
|-------------------------------------|---------------|---|---|
| <i>Oxytropis borealis</i>           | Magnoliophyta | 1 | 1 |
| <i>Oxytropis deflexa</i>            | Magnoliophyta | 1 | 1 |
| <i>Oxytropis maydelliana</i>        | Magnoliophyta | 1 | 1 |
| <i>Oxytropis varians</i>            | Magnoliophyta | 1 | 1 |
| <i>Oxytropis viscida</i>            | Magnoliophyta | 1 | 1 |
| <i>Pancreatium linosae</i>          | Magnoliophyta | 1 | 1 |
| <i>Pancreatium maritimum</i>        | Magnoliophyta | 1 | 1 |
| <i>Panicum miliaceum</i>            | Magnoliophyta | 1 | 1 |
| <i>Panicum sumatrense</i>           | Magnoliophyta | 1 | 1 |
| <i>Papaver hultenii</i>             | Magnoliophyta | 1 | 1 |
| <i>Parnassia kotzebuei</i>          | Magnoliophyta | 1 | 1 |
| <i>Parrya arctica</i>               | Magnoliophyta | 1 | 1 |
| <i>Parrya arctica</i>               | Magnoliophyta | 1 | 1 |
| <i>Paspalum scrobiculatum</i>       | Magnoliophyta | 1 | 0 |
| <i>Pauridia longituba</i>           | Magnoliophyta | 1 | 1 |
| <i>Pedicularis albolabiata</i>      | Magnoliophyta | 1 | 1 |
| <i>Pedicularis arctoeuropaea</i>    | Magnoliophyta | 1 | 1 |
| <i>Pedicularis capitata</i>         | Magnoliophyta | 1 | 1 |
| <i>Pedicularis lanata</i>           | Magnoliophyta | 1 | 1 |
| <i>Pedicularis langsdorffii</i>     | Magnoliophyta | 1 | 1 |
| <i>Pelargonium vitifolium</i>       | Magnoliophyta | 1 | 0 |
| <i>Peltandra virginica</i>          | Magnoliophyta | 1 | 1 |
| <i>Pennisetum glaucum</i>           | Magnoliophyta | 1 | 0 |
| <i>Phillyrea media</i>              | Magnoliophyta | 1 | 1 |
| <i>Philodendron hederaceum</i>      | Magnoliophyta | 1 | 0 |
| <i>Phippsia concinna</i>            | Magnoliophyta | 1 | 1 |
| <i>Physaria arctica</i>             | Magnoliophyta | 1 | 1 |
| <i>Pinellia cordata</i>             | Magnoliophyta | 1 | 1 |
| <i>Pinellia fujianensis</i>         | Magnoliophyta | 1 | 1 |
| <i>Pinellia pedatisecta</i>         | Magnoliophyta | 1 | 1 |
| <i>Pinellia peltata</i>             | Magnoliophyta | 1 | 1 |
| <i>Pinellia polyphylla</i>          | Magnoliophyta | 1 | 1 |
| <i>Pinellia ternata</i>             | Magnoliophyta | 1 | 1 |
| <i>Pinguicula vulgaris</i>          | Magnoliophyta | 1 | 1 |
| <i>Piptatherum miliaceum</i>        | Magnoliophyta | 1 | 1 |
| <i>Pistacia lentiscus</i>           | Magnoliophyta | 1 | 1 |
| <i>Pistia stratiotes</i>            | Magnoliophyta | 1 | 1 |
| <i>Pleuropogon sabinei</i>          | Magnoliophyta | 1 | 1 |
| <i>Poa abbreviata</i>               | Magnoliophyta | 1 | 1 |
| <i>Poa alpina</i>                   | Magnoliophyta | 1 | 1 |
| <i>Poa ammophila</i>                | Magnoliophyta | 1 | 1 |
| <i>Poa arctica</i>                  | Magnoliophyta | 1 | 1 |
| <i>Poa glauca</i>                   | Magnoliophyta | 1 | 1 |
| <i>Poa hartzii</i>                  | Magnoliophyta | 1 | 1 |
| <i>Poa pratensis</i>                | Magnoliophyta | 1 | 1 |
| <i>Pogonatherum crinitum</i>        | Magnoliophyta | 1 | 1 |
| <i>Pogonatherum crinitum</i>        | Magnoliophyta | 1 | 1 |
| <i>Polyscias guilfoylei</i>         | Magnoliophyta | 1 | 1 |
| <i>Portulacaria afra</i>            | Magnoliophyta | 1 | 1 |
| <i>Potentilla anserina</i>          | Magnoliophyta | 1 | 1 |
| <i>Potentilla arenosa</i>           | Magnoliophyta | 1 | 1 |
| <i>Potentilla biflora</i>           | Magnoliophyta | 1 | 1 |
| <i>Potentilla bimundorum</i>        | Magnoliophyta | 1 | 1 |
| <i>Potentilla nivea</i>             | Magnoliophyta | 1 | 1 |
| <i>Potentilla pulchella</i>         | Magnoliophyta | 1 | 1 |
| <i>Potentilla subgorodkovii</i>     | Magnoliophyta | 1 | 1 |
| <i>Primula stricta</i>              | Magnoliophyta | 1 | 1 |
| <i>Pseuderia smithiana</i>          | Magnoliophyta | 1 | 0 |
| <i>Pseudocranichis thysanochila</i> | Magnoliophyta | 1 | 1 |
| <i>Pseudodracontium harmandii</i>   | Magnoliophyta | 1 | 1 |
| <i>Pseudodracontium lanceolatum</i> | Magnoliophyta | 1 | 1 |
| <i>Pseudolaelia vellozicola</i>     | Magnoliophyta | 1 | 1 |
| <i>Pseudovanilla foliata</i>        | Magnoliophyta | 1 | 0 |
| <i>Pseudovanilla ponapensis</i>     | Magnoliophyta | 1 | 0 |
| <i>Ptilostemon greuteri</i>         | Magnoliophyta | 1 | 1 |
| <i>Puccinellia alaskana</i>         | Magnoliophyta | 1 | 1 |
| <i>Puccinellia andersonii</i>       | Magnoliophyta | 1 | 1 |
| <i>Puccinellia angustata</i>        | Magnoliophyta | 1 | 1 |
| <i>Puccinellia arctica</i>          | Magnoliophyta | 1 | 1 |
| <i>Puccinellia bruggemannii</i>     | Magnoliophyta | 1 | 1 |
| <i>Puccinellia hauptiana</i>        | Magnoliophyta | 1 | 0 |
| <i>Puccinellia nutkaensis</i>       | Magnoliophyta | 1 | 1 |
| <i>Puccinellia nuttalliana</i>      | Magnoliophyta | 1 | 1 |
| <i>Puccinellia phryganodes</i>      | Magnoliophyta | 1 | 1 |
| <i>Puccinellia pumila</i>           | Magnoliophyta | 1 | 1 |
| <i>Puccinellia tenella</i>          | Magnoliophyta | 1 | 1 |
| <i>Puccinellia vaginata</i>         | Magnoliophyta | 1 | 1 |
| <i>Puccinellia vahliana</i>         | Magnoliophyta | 1 | 1 |
| <i>Quercus ilex</i>                 | Magnoliophyta | 1 | 1 |
| <i>Ranunculus arcticus</i>          | Magnoliophyta | 1 | 1 |
| <i>Ranunculus lateriflorus</i>      | Magnoliophyta | 1 | 1 |

|                                   |               |   |   |
|-----------------------------------|---------------|---|---|
| <i>Remusatia hookeriana</i>       | Magnoliophyta | 1 | 1 |
| <i>Remusatia vivipara</i>         | Magnoliophyta | 1 | 1 |
| <i>Remusatia yunnanensis</i>      | Magnoliophyta | 1 | 1 |
| <i>Rhizophora mucronata</i>       | Magnoliophyta | 1 | 1 |
| <i>Rhododendron lapponicum</i>    | Magnoliophyta | 1 | 1 |
| <i>Rhododendron tomentosum</i>    | Magnoliophyta | 1 | 1 |
| <i>Rhodohypoxis baurii</i>        | Magnoliophyta | 1 | 1 |
| <i>Rhodohypoxis milloides</i>     | Magnoliophyta | 1 | 1 |
| <i>Rosa sempervirens</i>          | Magnoliophyta | 1 | 1 |
| <i>Roystonea regia</i>            | Magnoliophyta | 1 | 0 |
| <i>Roystonea regia</i>            | Magnoliophyta | 1 | 0 |
| <i>Ruscus aculeatus</i>           | Magnoliophyta | 1 | 1 |
| <i>Salix arctica</i>              | Magnoliophyta | 1 | 1 |
| <i>Salix arctophila</i>           | Magnoliophyta | 1 | 1 |
| <i>Salix glauca</i>               | Magnoliophyta | 1 | 1 |
| <i>Salix niphoclada</i>           | Magnoliophyta | 1 | 1 |
| <i>Salix reticulata</i>           | Magnoliophyta | 1 | 1 |
| <i>Salix richardsonii</i>         | Magnoliophyta | 1 | 1 |
| <i>Saxifraga aizoides</i>         | Magnoliophyta | 1 | 1 |
| <i>Saxifraga cernua</i>           | Magnoliophyta | 1 | 1 |
| <i>Saxifraga cespitosa</i>        | Magnoliophyta | 1 | 1 |
| <i>Saxifraga hirculus</i>         | Magnoliophyta | 1 | 1 |
| <i>Saxifraga oppositifolia</i>    | Magnoliophyta | 1 | 1 |
| <i>Saxifraga tricuspidata</i>     | Magnoliophyta | 1 | 1 |
| <i>Scindapsus aureus</i>          | Magnoliophyta | 1 | 0 |
| <i>Sesuvium portulacastrum</i>    | Magnoliophyta | 1 | 1 |
| <i>Setaria italica</i>            | Magnoliophyta | 1 | 1 |
| <i>Setaria viridis</i>            | Magnoliophyta | 1 | 1 |
| <i>Silene acaulis</i>             | Magnoliophyta | 1 | 1 |
| <i>Silene heuffelii</i>           | Magnoliophyta | 1 | 1 |
| <i>Silene involuocrata</i>        | Magnoliophyta | 1 | 1 |
| <i>Silene ostenfeldii</i>         | Magnoliophyta | 1 | 1 |
| <i>Silene uralensis</i>           | Magnoliophyta | 1 | 1 |
| <i>Smilax aspera</i>              | Magnoliophyta | 1 | 1 |
| <i>Sorghum bicolor</i>            | Magnoliophyta | 1 | 1 |
| <i>Sparganium hyperboreum</i>     | Magnoliophyta | 1 | 1 |
| <i>Spathiphyllum floribundum</i>  | Magnoliophyta | 0 | 1 |
| <i>Spathiphyllum wallisii</i>     | Magnoliophyta | 1 | 1 |
| <i>Spiloxene capensis</i>         | Magnoliophyta | 1 | 0 |
| <i>Spirodela intermedia</i>       | Magnoliophyta | 1 | 1 |
| <i>Stellaria longipes</i>         | Magnoliophyta | 1 | 1 |
| <i>Stuckenia filiformis</i>       | Magnoliophyta | 1 | 1 |
| <i>Stuckenia pectinata</i>        | Magnoliophyta | 1 | 1 |
| <i>Stuckenia vaginata</i>         | Magnoliophyta | 1 | 1 |
| <i>Suaeda maritima</i>            | Magnoliophyta | 1 | 1 |
| <i>Symphyotrichum pygmaeum</i>    | Magnoliophyta | 1 | 1 |
| <i>Syngonium podophyllum</i>      | Magnoliophyta | 1 | 1 |
| <i>Syngonium podophyllum</i>      | Magnoliophyta | 1 | 1 |
| <i>Taraxacum ceratophorum</i>     | Magnoliophyta | 1 | 1 |
| <i>Taraxacum holmenianum</i>      | Magnoliophyta | 1 | 1 |
| <i>Taraxacum hyparcticum</i>      | Magnoliophyta | 1 | 1 |
| <i>Taraxacum phymatocarpum</i>    | Magnoliophyta | 1 | 1 |
| <i>Taraxacum scopulorum</i>       | Magnoliophyta | 1 | 1 |
| <i>Tephrosia frigida</i>          | Magnoliophyta | 1 | 1 |
| <i>Thamnochortus cinereus</i>     | Magnoliophyta | 1 | 1 |
| <i>Tofieldia coccinea</i>         | Magnoliophyta | 1 | 1 |
| <i>Tofieldia pusilla</i>          | Magnoliophyta | 1 | 1 |
| <i>Tradescantia spathacea</i>     | Magnoliophyta | 1 | 1 |
| <i>Tradescantia spathacea</i>     | Magnoliophyta | 1 | 1 |
| <i>Trichophorum cespitosum</i>    | Magnoliophyta | 1 | 1 |
| <i>Triglochin maritima</i>        | Magnoliophyta | 1 | 1 |
| <i>Triglochin palustris</i>       | Magnoliophyta | 1 | 1 |
| <i>Tripleurospermum maritimum</i> | Magnoliophyta | 1 | 1 |
| <i>Trisetum spicatum</i>          | Magnoliophyta | 1 | 1 |
| <i>Vaccinium uliginosum</i>       | Magnoliophyta | 1 | 1 |
| <i>Vaccinium vitis-idaea</i>      | Magnoliophyta | 1 | 1 |
| <i>Verbena hastata</i>            | Magnoliophyta | 1 | 1 |
| <i>Verbena hastata</i>            | Magnoliophyta | 1 | 1 |
| <i>Wrightia religiosa</i>         | Magnoliophyta | 1 | 1 |
| <i>Abies chensiensis</i>          | Pinophyta     | 1 | 1 |
| <i>Abies delavayi</i>             | Pinophyta     | 1 | 1 |
| <i>Abies densa</i>                | Pinophyta     | 1 | 1 |
| <i>Abies ernestii</i>             | Pinophyta     | 1 | 1 |
| <i>Abies fabri</i>                | Pinophyta     | 1 | 1 |
| <i>Abies fargesii</i>             | Pinophyta     | 1 | 1 |
| <i>Abies ferrena</i>              | Pinophyta     | 1 | 1 |
| <i>Abies forrestii</i>            | Pinophyta     | 1 | 1 |
| <i>Abies georgei</i>              | Pinophyta     | 1 | 1 |
| <i>Abies holophylla</i>           | Pinophyta     | 1 | 1 |
| <i>Abies nephrolepis</i>          | Pinophyta     | 1 | 1 |
| <i>Abies recurvata</i>            | Pinophyta     | 1 | 1 |

|                                    |               |   |   |
|------------------------------------|---------------|---|---|
| <i>Abies spectabilis</i>           | Pinophyta     | 1 | 1 |
| <i>Abies squamata</i>              | Pinophyta     | 1 | 1 |
| <i>Pinus contorta</i>              | Pinophyta     | 1 | 1 |
| <i>Pinus jeffreyi</i>              | Pinophyta     | 1 | 1 |
| <i>Pinus muricata</i>              | Pinophyta     | 1 | 1 |
| <i>Pinus radiata</i>               | Pinophyta     | 1 | 1 |
| <i>Platycladus orientalis</i>      | Pinophyta     | 1 | 1 |
| <i>Sphaeropteris glauca</i>        | Pteridiophyta | 1 | 0 |
| <i>Asplenium nidus</i>             | Pteridiophyta | 1 | 0 |
| <i>Asplenium nitens</i>            | Pteridiophyta | 1 | 0 |
| <i>Asplenium normale</i>           | Pteridiophyta | 1 | 0 |
| <i>Asplenium northlandicum</i>     | Pteridiophyta | 1 | 0 |
| <i>Asplenium obliquissimum</i>     | Pteridiophyta | 1 | 0 |
| <i>Asplenium obliquum</i>          | Pteridiophyta | 1 | 0 |
| <i>Asplenium oblongifolium</i>     | Pteridiophyta | 1 | 0 |
| <i>Asplenium obtusatum</i>         | Pteridiophyta | 1 | 0 |
| <i>Botrychium virginianum</i>      | Pteridiophyta | 1 | 0 |
| <i>Elaphoglossum lingua</i>        | Pteridiophyta | 1 | 0 |
| <i>Elaphoglossum lonchophyllum</i> | Pteridiophyta | 1 | 0 |
| <i>Elaphoglossum luridum</i>       | Pteridiophyta | 1 | 0 |
| <i>Elaphoglossum metallicum</i>    | Pteridiophyta | 1 | 0 |
| <i>Elaphoglossum minutum</i>       | Pteridiophyta | 1 | 0 |
| <i>Elaphoglossum moorei</i>        | Pteridiophyta | 1 | 0 |
| <i>Elaphoglossum nigrocostatum</i> | Pteridiophyta | 1 | 0 |
| <i>Elaphoglossum orbignyanum</i>   | Pteridiophyta | 1 | 0 |
| <i>Nephrolepis exaltata</i>        | Pteridiophyta | 1 | 0 |
| <i>Sphaeropteris albifrons</i>     | Pteridiophyta | 1 | 0 |
| <i>Sphaeropteris atrox</i>         | Pteridiophyta | 1 | 0 |
| <i>Sphaeropteris auriculifera</i>  | Pteridiophyta | 1 | 0 |
| <i>Sphaeropteris brunei</i>        | Pteridiophyta | 1 | 0 |
| <i>Sphaeropteris capitata</i>      | Pteridiophyta | 1 | 0 |
| <i>Sphaeropteris celebica</i>      | Pteridiophyta | 1 | 0 |
| <i>Sphaeropteris cooperi</i>       | Pteridiophyta | 1 | 0 |
| <i>Sphaeropteris excelsa</i>       | Pteridiophyta | 1 | 0 |
| <i>Sphaeropteris horrida</i>       | Pteridiophyta | 1 | 0 |

**Supplementary Table S2. Species pairs used to retrieve full-length barcodes from chloroplast genomes and barcode databases.** List of 101 generic species pairs for which sequence data of *matK* and *rbcL* loci were downloaded from complete chloroplast genomes from NCBI, and from barcoding entries of BOLD.

|    | Generic species pair            | NCBI chloroplast genome accession number |          | BOLD accession numbers: <i>matK</i>                                                                                                                                                                                                                                                                                           | BOLD accession numbers: <i>rbcL</i>                                                                                                                                                                                                                                                                                                          |
|----|---------------------------------|------------------------------------------|----------|-------------------------------------------------------------------------------------------------------------------------------------------------------------------------------------------------------------------------------------------------------------------------------------------------------------------------------|----------------------------------------------------------------------------------------------------------------------------------------------------------------------------------------------------------------------------------------------------------------------------------------------------------------------------------------------|
|    |                                 |                                          |          |                                                                                                                                                                                                                                                                                                                               |                                                                                                                                                                                                                                                                                                                                              |
| 1  | <i>Acorus calamus</i>           | NC_007407.1                              | AJ879453 | CPBOL159-11, CPBOL161-11, CPBOL163-11, GBVA1508-11, GBVA1510-11, GBVA1511-11, GBVA1512-11, GBVA1516-11, GBVA1518-11, GBVB782-11, GBVB783-11, GBVB784-11, GBVB785-11, GBVR1770-13, GBVS384-13, GBVS388-13, GBVT1243-13, GBVT1244-13, GBVT1245-13, GBVT1246-13, GBVT1247-13, GBVT1248-13, GBVT1249-13, GBVT1250-13, GBVX1809-13 | CPBOL159-11, CPBOL161-11, GBVA1509-11, GBVA1513-11, GBVA1514-11, GBVA1515-11, GBVA1517-11, GBVA1519-11, GBVA1520-11, GBVA1521-11, GBVA1522-11, GBVB786-11, GBVB787-11, GBVR1770-13, GBVT1160-13, GBVT1161-13, GBVT1162-13, GBVT1163-13, GBVT1164-13, GBVT1165-13, GBVT1166-13, GBVT1167-13, GBVX1809-13, GBVX6401-15, GBVY136-14, GBVY139-14 |
|    | <i>Acorus gramineus</i>         | NC_026299.1                              | KP099646 | CPBOL165-11, CPBOL167-11, CPBOL169-11, GBVA1523-11, GBVA1525-11, GBVA1529-11, GBVB789-11, GBVB790-11, GBVB791-11, GBVB792-11, GBVB793-11, GBVB794-11, GBVT1227-13, GBVT1228-13, GBVT1229-13, GBVT1230-13, GBVX7607-15                                                                                                         | CPBOL165-11, CPBOL167-11, CPBOL169-11, GBVA1524-11, GBVA1526-11, GBVA1527-11, GBVA1528-11, GBVA1530-11, GBVA1531-11, GBVB795-11, GBVS3837-13, GBVT1143-13, GBVT1144-13, GBVT1145-13, GBVT1146-13, GBVX7607-15                                                                                                                                |
| 2  | <i>Actinidia chinensis</i>      | NC_026690.1                              | KP297242 | GBVK4698-11, GBVK4699-11                                                                                                                                                                                                                                                                                                      | GBVK4700-11, GBVK4701-11, GBVK4702-11, GBVK4703-11, GBVK4704-11                                                                                                                                                                                                                                                                              |
|    | <i>Actinidia deliciosa</i>      | NC_026691.1                              | KP297244 | GBVK4710-11, GBVK4626-13                                                                                                                                                                                                                                                                                                      |                                                                                                                                                                                                                                                                                                                                              |
| 3  | <i>Aegilops sharonensis</i>     | NC_024816.1                              | KJ614419 | GBVD2616-11, GBVD2617-11, GBVD2618-11, GBVD2619-11, GBVD2620-11, GBVX6343-15, GBVX6345-15, GBVX7862-15                                                                                                                                                                                                                        | GBVX6343-15, GBVX6345-15, GBVX7862-15                                                                                                                                                                                                                                                                                                        |
|    | <i>Aegilops speltoides</i>      | NC_022135.1                              | JQ740834 | GBVD2621-11, GBVD2622-11, GBVD2624-11, GBVD2625-11, GBVD2626-11, GBVD2627-11, GBVD2628-11, GBVD2629-11, GBVD2630-11, GBVD2631-11, GBVD2632-11                                                                                                                                                                                 | GBVD2623-11, GBVX7803-15                                                                                                                                                                                                                                                                                                                     |
| 4  | <i>Aethionema cordifolium</i>   | NC_009265.1                              | AP009366 | GBVR1892-13, GBVX1842-13                                                                                                                                                                                                                                                                                                      | GBVR1892-13, GBVX1842-13                                                                                                                                                                                                                                                                                                                     |
|    | <i>Aethionema grandiflorum</i>  | NC_009266.1                              | AP009367 | GBVE3046-11, GBVR1893-13, GBVX1843-13                                                                                                                                                                                                                                                                                         | GBVE3047-11, GBVR1893-13, GBVX1843-13                                                                                                                                                                                                                                                                                                        |
| 5  | <i>Amentotaxus argotaenia</i>   | NC_027581.1                              | KR780582 | CPBOL308-11, CPBOL310-11, CPBOL312-11, GBVM1032-11, GBVM1033-11, GBVM1034-11, GBVQ1399-13, GBVQ2599-13                                                                                                                                                                                                                        | CPBOL308-11, CPBOL310-11, CPBOL312-11, GBVM1031-11, GBVM1035-11, GBVM1036-11, GBVM1037-11, GBVQ1438-13, GBVQ2723-13                                                                                                                                                                                                                          |
|    | <i>Amentotaxus formosana</i>    | NC_024945.1                              | AP014574 | CPBOL314-11, GBVM1039-11, GBVX7907-15, GBVX7959-15                                                                                                                                                                                                                                                                            | CPBOL314-11, GBVM1038-11, GBVX7907-15, GBVX7959-15                                                                                                                                                                                                                                                                                           |
| 6  | <i>Angiopteris angustifolia</i> | NC_026300.1                              | KP099647 | GBVX8013-15, GBVX8038-15                                                                                                                                                                                                                                                                                                      | GBVM1403-11, GBVX8013-15, GBVX8038-15                                                                                                                                                                                                                                                                                                        |
|    | <i>Angiopteris evecta</i>       | NC_008829.1                              | DQ821119 | GBVQ568-13, GBVQ4540-13                                                                                                                                                                                                                                                                                                       | GBVM1408-11, GBVM1409-11, GBVM1410-11, GBVM1411-11, GBVM1412-11, GBVM1413-11, GBVQ568-13, GBVQ4540-13                                                                                                                                                                                                                                        |
| 7  | <i>Angophora costata</i>        | NC_022412.1                              | KC180805 | GBVH4871-11, GBVX2220-15, GBVX2342-15, GBVX2460-15, GBVX3631-15                                                                                                                                                                                                                                                               | GBVH4870-11                                                                                                                                                                                                                                                                                                                                  |
|    | <i>Angophora floribunda</i>     | NC_022411.1                              | KC180804 | GBVX2286-15, GBVX2446-15, GBVX3632-15                                                                                                                                                                                                                                                                                         |                                                                                                                                                                                                                                                                                                                                              |
| 8  | <i>Anthoxanthum nitens</i>      | NC_027475.1                              | KM974740 | GBVR4252-13, VEMSH665-13                                                                                                                                                                                                                                                                                                      | GBVD2850-11, GBVS3326-13, GBVW2857-13, VEMSH665-13                                                                                                                                                                                                                                                                                           |
|    | <i>Anthoxanthum odoratum</i>    | NC_027467.1                              | KM974732 | GBVD2851-11, GBVD2853-11, GBVR1774-13, GBVW1877-13, GRASS951-07, GRASS1261-07, GRASS1273-07, POWNA040-10, POWNA1027-12, POWNA1030-12                                                                                                                                                                                          | GBVD2852-11, GBVD2854-11, GBVD2855-11, GBVY479-14, GBVY481-14, GBVY483-14, GBVY485-14, GRASS951-07, GRASS1261-07, GRASS1273-07, POWNA040-10, POWNA1027-12, POWNA1030-12                                                                                                                                                                      |
| 9  | <i>Arabis alpina</i>            | NC_023367.1                              | HF934132 | FCA1857-11, FCA1858-11, FCA1859-11, FCA2022-11, GBVE3100-11, GBVE3101-11, GBVP2280-14, IASVF236-09, MKPCH716-10, MKPCH717-10                                                                                                                                                                                                  | FCA1857-11, FCA1858-11, FCA1859-11, FCA1860-11, FCA2022-11, GBVP2280-14, IASVF236-09, MKPCH716-10, MKPCH717-10                                                                                                                                                                                                                               |
|    | <i>Arabis hirsuta JO23</i>      | NC_009268.1                              | AP009369 | GBVE3103-11, GBVE3105-11, GBVR1895-13, GBVX1845-13, POWNA049-10, POWNA1065-12, POWNA1066-12                                                                                                                                                                                                                                   | GBVE3104-11, GBVR1895-13, GBVW2805-13, GBVX1845-13, POWNA049-10, POWNA1065-12, POWNA1066-12                                                                                                                                                                                                                                                  |
| 10 | <i>Arundinaria fargesii</i>     | NC_024712.1                              | JX513413 | GBVT2008-13, GBVT2009-13, GBVT2010-13, GBVT2011-13, GBVX4872-15, GBVX7838-15                                                                                                                                                                                                                                                  | GBVT2103-13, GBVT2104-13, GBVT2105-13, GBVT2106-13, GBVX4872-15, GBVX7838-15                                                                                                                                                                                                                                                                 |

|    |                                     |             |          |                                                                                                                                                                                                                                                                                                                                                                                                                                                                                         |                                                                                                                                                                                                                                                                                                                                                                                                                                                                                                                                                                                     |
|----|-------------------------------------|-------------|----------|-----------------------------------------------------------------------------------------------------------------------------------------------------------------------------------------------------------------------------------------------------------------------------------------------------------------------------------------------------------------------------------------------------------------------------------------------------------------------------------------|-------------------------------------------------------------------------------------------------------------------------------------------------------------------------------------------------------------------------------------------------------------------------------------------------------------------------------------------------------------------------------------------------------------------------------------------------------------------------------------------------------------------------------------------------------------------------------------|
|    | <i>Arundinaria tecta</i>            | NC_023935.1 | KC817463 | GBVD2892-11                                                                                                                                                                                                                                                                                                                                                                                                                                                                             | GBVD2891-11                                                                                                                                                                                                                                                                                                                                                                                                                                                                                                                                                                         |
| 11 | <i>Asclepias nivea</i>              | NC_022431.1 | KF539844 |                                                                                                                                                                                                                                                                                                                                                                                                                                                                                         |                                                                                                                                                                                                                                                                                                                                                                                                                                                                                                                                                                                     |
|    | <i>Asclepias syriaca</i>            | NC_022432.1 | KF386166 | GBVG9573-11, GBVS2867-13, GBVS4349-13, KSR133-07, VEMSH237-13, WABLK367-13, WABLK478-13                                                                                                                                                                                                                                                                                                                                                                                                 | GBVG574-11, GBVS2935-13, GBVS4349-13, GBVY625-14, KSR133-07, VEMSH237-13                                                                                                                                                                                                                                                                                                                                                                                                                                                                                                            |
| 12 | <i>Bambusa bambos</i>               | NC_026957.1 | KJ870988 | GBVD3012-11, GBVW3643-13, GBVW3646-13                                                                                                                                                                                                                                                                                                                                                                                                                                                   | GBVX1713-13, GENG291-14, TDEF061-12, TDEF062-12, TDEF063-12                                                                                                                                                                                                                                                                                                                                                                                                                                                                                                                         |
|    | <i>Bambusa emeiensis</i>            | NC_015830.1 | HQ337797 | GBVS1654-13, GBVS2807-13, GBVX1918-13                                                                                                                                                                                                                                                                                                                                                                                                                                                   | GBVD3014-11, GBVS2807-13, GBVX1918-13                                                                                                                                                                                                                                                                                                                                                                                                                                                                                                                                               |
| 13 | <i>Brassica napus ZY036</i>         | NC_016734.1 | GQ861354 | GBVE3176-11, GBVE3178-11, GBVE3179-11, GBVE3180-11, GBVE3181-11, GBVE3182-11, GBVR4446-13, GBVT318-13, GBVX1945-13, GBVX6570-15                                                                                                                                                                                                                                                                                                                                                         | GBVE3177-11, GBVE3183-11, GBVE3184-11, GBVE3185-11, GBVE3186-11, GBVR4446-13, GBVX1945-13, GBVX6570-15, GBVX6647-15                                                                                                                                                                                                                                                                                                                                                                                                                                                                 |
|    | <i>Brassica rapa</i>                | NC_015139.1 | DQ231548 | GBVE3203-11, GBVE3204-11, POWNA081-10, POWNA1424-12                                                                                                                                                                                                                                                                                                                                                                                                                                     | GBVX6649-15, POWNA081-10, POWNA1424-12                                                                                                                                                                                                                                                                                                                                                                                                                                                                                                                                              |
| 14 | <i>Callitropsis nootkatensis</i>    | NC_026295.1 | KP099642 | GBVL4070-11, GBVL4072-11, GBVL4073-11, GBVQ1120-13, GBVX7929-15, GBVX7930-15, GBVX7953-15                                                                                                                                                                                                                                                                                                                                                                                               | GBVL4071-11, GBVL4074-11, GBVX7939-15, GBVX7940-15, GBVX7953-15                                                                                                                                                                                                                                                                                                                                                                                                                                                                                                                     |
|    | <i>Callitropsis vietnamensis</i>    | NC_026298.1 | KP099645 | GBVQ1156-13, GBVX7956-15                                                                                                                                                                                                                                                                                                                                                                                                                                                                | GBVX7956-15                                                                                                                                                                                                                                                                                                                                                                                                                                                                                                                                                                         |
| 15 | <i>Camellia crapnelliana</i>        | NC_024541.1 | KF753632 | GBVP6306-15                                                                                                                                                                                                                                                                                                                                                                                                                                                                             | GBVP6306-15                                                                                                                                                                                                                                                                                                                                                                                                                                                                                                                                                                         |
|    | <i>Camellia grandibracteata</i>     | NC_024659.1 | KJ806274 | GBVX5812-15, GBVX5830-15                                                                                                                                                                                                                                                                                                                                                                                                                                                                | GBVX5843-15, GBVX7830-15                                                                                                                                                                                                                                                                                                                                                                                                                                                                                                                                                            |
| 16 | <i>Capsella bursa-pastoris JO22</i> | NC_009270.1 | AP009371 | GBVE3229-11, GBVE3231-11, GBVR1897-13, GBVX1847-13, KSR175-07, MKPCH422-09                                                                                                                                                                                                                                                                                                                                                                                                              | GBVE3230-11, GBVE3232-11, GBVE3233-11, GBVE3234-11, GBVE3235-11, GBVR1897-13, GBVT364-13, GBVW2807-13, GBVX1847-13, GBVY1204-14, KSR175-07, MKPCH422-09, PLGE128-13, POWNB062-10, POWNB230-10, VEMSH177-13                                                                                                                                                                                                                                                                                                                                                                          |
|    | <i>Capsella rubella</i>             | NC_027693.1 | KR029093 | GBVE3243-11, GBVE3245-11, GBVE3246-11, GBVE3247-11, GBVE3248-11, GBVE3249-11, GBVE3250-11, GBVE3251-11, GBVE3252-11, GBVE3253-11, GBVE3254-11, GBVE3255-11, GBVE3256-11, GBVE3257-11, GBVE3258-11, GBVE3259-11, GBVE3260-11, GBVE3261-11, GBVE3262-11, GBVE3263-11, GBVE3264-11, GBVE3265-11, GBVE3266-11, GBVE3267-11, GBVE3268-11, GBVE3269-11, GBVE3270-11                                                                                                                           | GBVE3244-11                                                                                                                                                                                                                                                                                                                                                                                                                                                                                                                                                                         |
| 17 | <i>Capsicum annuum</i>              | NC_018552.1 | JX270811 | GBVK3996-11, GBVR914-13, GBVR916-13, GBVR918-13, GBVR920-13, GBVR922-13, GBVR924-13, GBVR926-13, GBVR928-13, GBVR930-13, GBVR932-13, GBVR934-13, GBVR936-13, GBVR938-13, GBVR940-13, GBVR942-13, GBVR944-13, GBVR946-13, GBVR948-13, GBVR950-13, GBVR952-13, GBVR954-13, GBVR956-13, GBVR958-13, GBVR960-13, GBVR962-13, GBVR964-13, GBVR966-13, GBVR968-13, GBVR970-13, GBVR972-13, GBVR974-13, GBVR976-13, GBVR978-13, GBVR980-13, GBVT1372-13, GBVW1482-13, GBVX1964-13, GBVX6351-15 | GBVR915-13, GBVR917-13, GBVR919-13, GBVR921-13, GBVR923-13, GBVR925-13, GBVR927-13, GBVR929-13, GBVR931-13, GBVR933-13, GBVR935-13, GBVR937-13, GBVR939-13, GBVR941-13, GBVR943-13, GBVR945-13, GBVR947-13, GBVR951-13, GBVR953-13, GBVR955-13, GBVR957-13, GBVR959-13, GBVR961-13, GBVR963-13, GBVR965-13, GBVR967-13, GBVR969-13, GBVR971-13, GBVR973-13, GBVR975-13, GBVR977-13, GBVR979-13, GBVR981-13, GBVS1605-13, GBVT1422-13, GBVW1482-13, GBVW2962-13, GBVX1964-13, GBVX6363-15, GBVX7405-15, GBVY1206-14, GBVY1208-14, GBVY1210-14, GBVY1212-14, GBVY1214-14, HIDNA035-14 |
|    | <i>Capsicum lycianthoides</i>       | NC_026551.1 | KP274856 |                                                                                                                                                                                                                                                                                                                                                                                                                                                                                         |                                                                                                                                                                                                                                                                                                                                                                                                                                                                                                                                                                                     |
| 18 | <i>Cardamine impatiens</i>          | NC_026445.1 | KJ136821 | CPBOL690-11, CPBOL692-11, CPBOL694-11, GBVX5723-15, POWNA103-10                                                                                                                                                                                                                                                                                                                                                                                                                         | CPBOL690-11, CPBOL692-11, CPBOL694-11, GBVX5723-15, POWNA103-10, POWNA1891-12                                                                                                                                                                                                                                                                                                                                                                                                                                                                                                       |
|    | <i>Cardamine resedifolia</i>        | NC_026446.1 | KJ136822 | GBVX5724-15                                                                                                                                                                                                                                                                                                                                                                                                                                                                             | GBVX5724-15                                                                                                                                                                                                                                                                                                                                                                                                                                                                                                                                                                         |
| 19 | <i>Cephalotaxus oliveri</i>         | NC_021110.1 | KC136217 | CPBOL804-11, GBVL4036-11, GBVQ4073-13, GBVQ4595-13                                                                                                                                                                                                                                                                                                                                                                                                                                      | CPBOL804-11, GBVL4037-11, GBVL4038-11, GBVQ4073-13, GBVQ4595-13                                                                                                                                                                                                                                                                                                                                                                                                                                                                                                                     |
|    | <i>Cephalotaxus wilsoniana</i>      | NC_016063.1 | AP012265 | GBVL4052-11, GBVQ512-13, GBVQ4579-13                                                                                                                                                                                                                                                                                                                                                                                                                                                    | GBVL4053-11, GBVL4054-11, GBVL4055-11, GBVQ512-13, GBVQ4579-13                                                                                                                                                                                                                                                                                                                                                                                                                                                                                                                      |
| 20 | <i>Chloranthus japonicus</i>        | NC_026565.1 | KP256024 |                                                                                                                                                                                                                                                                                                                                                                                                                                                                                         | GBV1216-11                                                                                                                                                                                                                                                                                                                                                                                                                                                                                                                                                                          |
|    | <i>Chloranthus spicatus</i>         | NC_009598.1 | EF380352 | GBVR2630-13, GBVX1853-13                                                                                                                                                                                                                                                                                                                                                                                                                                                                | GBV1220-11, GBVR2630-13, GBVX1853-13                                                                                                                                                                                                                                                                                                                                                                                                                                                                                                                                                |
| 21 | <i>Chrysanthemum indicum</i>        | NC_020320.1 | JN867589 | GBVT4121-13, GBVT4122-13, GBVX1983-13                                                                                                                                                                                                                                                                                                                                                                                                                                                   | GBVT338-13, GBVT4121-13, GBVT4122-13, GBVX1983-13, GENG1119-15                                                                                                                                                                                                                                                                                                                                                                                                                                                                                                                      |
|    | <i>Chrysanthemum x morifolium</i>   | NC_020092.1 | JQ362483 | GBVN3047-11, GBVN3048-11, GBVU573-13, GBVX1977-13                                                                                                                                                                                                                                                                                                                                                                                                                                       | GBVT339-13, GBVU573-13, GBVX1977-13, GBVX7081-15                                                                                                                                                                                                                                                                                                                                                                                                                                                                                                                                    |

|    |                                  |             |          |                                                                                                                                                                                                                |                                                                                                                                                                                                                                             |
|----|----------------------------------|-------------|----------|----------------------------------------------------------------------------------------------------------------------------------------------------------------------------------------------------------------|---------------------------------------------------------------------------------------------------------------------------------------------------------------------------------------------------------------------------------------------|
| 22 | <i>Chusquea circinata</i>        | NC_027490.1 | KP319241 |                                                                                                                                                                                                                | GBVD3202-11                                                                                                                                                                                                                                 |
|    | <i>Chusquea liebmannii</i>       | NC_026969.1 | KJ871001 | GBVD3205-11                                                                                                                                                                                                    | GBVD3206-11                                                                                                                                                                                                                                 |
| 23 | <i>Cistanche deserticola</i>     | NC_021111.1 | KC128846 | GBVW3974-13, GBVX1997-13                                                                                                                                                                                       |                                                                                                                                                                                                                                             |
|    | <i>Cistanche phelypaea</i>       | NC_025642.1 | HG515538 | GBVK2930-11, GBVX4854-15, GBVX7886-15                                                                                                                                                                          | GBVK2929-11                                                                                                                                                                                                                                 |
| 24 | <i>Citrus aurantiifolia</i>      | NC_024929.1 | KJ865401 | GBVK859-11, GBVR297-13, GBVX6569-15, GBVX7866-15, TDEF422-12, TDEF423-12                                                                                                                                       | GBVK860-11, GBVX6569-15, GBVX7866-15, TDEF421-12, TDEF422-12, TDEF423-12                                                                                                                                                                    |
|    | <i>Citrus sinensis</i>           | NC_008334.1 | DQ864733 | GBVK919-11, GBVK920-11, GBVR310-13, GBVR1553-13, GBVR2518-13, GBVX1826-13, GBVX4786-15, GBVX4822-15                                                                                                            | GBVK921-11, GBVK922-11, GBVK923-11, GBVR2518-13, GBVX1671-13, GBVX1826-13, GBVX4826-15, GENG1072-15                                                                                                                                         |
| 25 | <i>Corallorhiza mertensiana</i>  | NC_025661.1 | KM390018 | GBVA4212-11, GBVP5473-15, GBVP6873-15                                                                                                                                                                          | GBVA4211-11                                                                                                                                                                                                                                 |
|    | <i>Corallorhiza odontorhiza</i>  | NC_025664.1 | KM390021 | GBVA4214-11, GBVX7376-15, GBVX7890-15                                                                                                                                                                          | GBVA4213-11, GBVA4215-11, GBVX7376-15, GBVX7890-15                                                                                                                                                                                          |
| 26 | <i>Corymbia eximia</i>           | NC_022409.1 | KC180802 |                                                                                                                                                                                                                |                                                                                                                                                                                                                                             |
|    | <i>Corymbia maculata</i>         | NC_022408.1 | KC180801 | GBVH4944-11                                                                                                                                                                                                    |                                                                                                                                                                                                                                             |
| 27 | <i>Cucumis melo</i>              | NC_015983.1 | JF412791 | GBVL1271-11, GBVL1273-11, GBVT686-13, GBVT687-13, GBVT688-13, GBVT689-13, GBVT690-13, GBVT691-13, GBVT692-13, GBVT693-13, GBVT694-13, GBVT695-13, GBVT696-13                                                   | GBVL1272-11, GBVL1274-11, GENG616-14                                                                                                                                                                                                        |
|    | <i>Cucumis sativus</i>           | NC_007144.1 | AJ970307 | GBVT681-13, GBVT683-13, GBVR2519-13, GBVL1293-11, GBVT680-13, GBVX1808-13, GBVT682-13, GBVR2395-13, GBVT678-13, GBVR1771-13, GBVT684-13, GBVT677-13, GBVT679-13, GBVR2520-13                                   | GBVL1290-11, GBVL1291-11, GBVR1771-13, GBVR2395-13, GBVR2519-13, GBVR2520-13, GBVX1808-13, GBVY1700-14                                                                                                                                      |
| 28 | <i>Cuscuta exaltata</i>          | NC_009963.1 | EU189132 | GBVX1863-13                                                                                                                                                                                                    | GBVX1863-13                                                                                                                                                                                                                                 |
|    | <i>Cuscuta reflexa</i>           | NC_009766.1 | AM711640 | GBVK3495-11, GBVR1867-13, GBVX1858-13                                                                                                                                                                          | GBVK3496-11, GBVR1867-13, GBVX1858-13                                                                                                                                                                                                       |
| 29 | <i>Cycas revoluta</i>            | NC_020319.1 | JN867588 | GBVB328-11, GBVQ2273-13, GBVQ2618-13, GBVQ2619-13, GBVQ4590-13                                                                                                                                                 | GBVB329-11, GBVB330-11, GBVB331-11, GBVP3658-15, GBVQ1763-15, GBVQ1764-15, GBVQ2273-13, GBVQ2742-13, GBVQ2743-13                                                                                                                            |
|    | <i>Cycas taitungensis</i>        | NC_009618.1 | AP009339 | GBVB339-11, GBVB340-11, GBVQ504-13, GBVQ4542-13                                                                                                                                                                | GBVQ504-13, GBVQ4542-13                                                                                                                                                                                                                     |
| 30 | <i>Cymbidium faberi</i>          | NC_027743.1 | KR919606 | GBVX3826-15, GBVX3827-15                                                                                                                                                                                       | GBVX3857-15, GBVX3858-15                                                                                                                                                                                                                    |
|    | <i>Cymbidium sinense</i>         | NC_021430.1 | KC876123 | GBVA4475-11, GBVX1232-13, GBVX2004-13, GBVX3839-15, GBVX3840-15, GBVX3841-15, GBVX3842-15, GBVY235-14, GBVY879-14, GBVY1335-14, GBVY1372-14, GBVY1375-14                                                       | GBVX1232-13, GBVX2004-13, GBVX3870-15, GBVX3871-15, GBVX3872-15, GBVX3873-15                                                                                                                                                                |
| 31 | <i>Cypripedium japonicum</i>     | NC_027227.1 | KJ625630 | GBVT1682-13, GBVX5109-15                                                                                                                                                                                       | GBVB2685-11, GBVT1698-13, GBVX1052-13, GBVY1761-14                                                                                                                                                                                          |
|    | <i>Cypripedium macranthos</i>    | NC_024421.1 | KF925434 | GBVX790-13, GBVX5110-15, GBVX5390-15, GBVX7826-15                                                                                                                                                              | GBVB2686-11, GBVX1053-13, GBVX1054-13, GBVX1055-13, GBVX5390-15, GBVX7826-15, GBVY1763-14                                                                                                                                                   |
| 32 | <i>Dendrobium catenatum</i>      | NC_024019.1 | KC771275 | GBVP4127-15, GBVP4128-15, GBVX1430-13, GBVX1431-13, GBVX1432-13, GBVX1433-13, GBVX6568-15                                                                                                                      | GBVX6568-15                                                                                                                                                                                                                                 |
|    | <i>Dendrobium strongylanthum</i> | NC_027691.1 | KR673323 | GBVX1502-13, GBVX1503-13                                                                                                                                                                                       |                                                                                                                                                                                                                                             |
| 33 | <i>Dendropanax dentiger</i>      | NC_026546.1 | KP271241 | GBVE1586-11                                                                                                                                                                                                    | GBVE1587-11                                                                                                                                                                                                                                 |
|    | <i>Dendropanax morbifer</i>      | NC_027607.1 | KR136270 |                                                                                                                                                                                                                |                                                                                                                                                                                                                                             |
| 34 | <i>Dioscorea rotundata</i>       | NC_024170.1 | KJ490011 | GBVC2111-11, GBVX2909-15, GBVX5964-15, GBVX7820-15                                                                                                                                                             | GBVC2112-11, GBVX5964-15, GBVX7820-15                                                                                                                                                                                                       |
|    | <i>Dioscorea zingiberensis</i>   | NC_027090.1 | KP899622 | GBVC2148-11, GBVT4937-13, GBVT4934-13, GBVT4931-13, GBVT4929-13, GBVP2960-14, GBVP2959-14, GBVP2962-14, GBVT4932-13, GBVP2963-14, GBVT4936-13, GBVT4933-13, GBVP2961-14, GBVT4930-13, GBVT4935-13, GBVT4938-13 | GBVP3059-14, GBVP3060-14, GBVP3061-14, GBVP3062-14, GBVP3063-14, GBVP3064-14, GBVP3065-14, GBVP3066-14, GBVP3067-14, GBVU077-13, GBVU078-13, GBVU079-13, GBVU080-13, GBVU081-13, GBVU082-13, GBVU083-13, GBVU084-13, GBVU085-13, GBVU086-13 |



|    |                                               |             |          |                                                                                                                                                                                                                                                     |                                                                                                                                                                                                                                                       |
|----|-----------------------------------------------|-------------|----------|-----------------------------------------------------------------------------------------------------------------------------------------------------------------------------------------------------------------------------------------------------|-------------------------------------------------------------------------------------------------------------------------------------------------------------------------------------------------------------------------------------------------------|
| 35 | <i>Dunalia obovata</i>                        | NC_026563.1 | KP280057 |                                                                                                                                                                                                                                                     |                                                                                                                                                                                                                                                       |
|    | <i>Dunalia solanacea</i>                      | NC_027099.1 | KP998157 |                                                                                                                                                                                                                                                     |                                                                                                                                                                                                                                                       |
| 36 | <i>Equisetum arvense</i>                      | NC_014699.1 | GU191334 | GBVB445-11, GBVB446-11, GBVB447-11, GBVQ706-13, GBVQ2335-13, GBVQ4573-13                                                                                                                                                                            | GBVA1036-11, GBVA1037-11, GBVA1038-11, GBVA1039-11, GBVB448-11, GBVQ2335-13, GBVQ4573-13, GBVQ706-13, GBVX8012-15, IASVF132-09, IASVF150-09, KSR529-08, PLGE138-13, RRPLA061-15, VEMSH503-13, VEMSH504-13, VEMSH508-13, WABLK462-13                   |
|    | <i>Equisetum hyemale</i>                      | NC_020146.1 | KC117177 | GBVA1050-11, GBVA1051-11, GBVP1735-14, GBVP1734-14, GBVQ4070-13, GBVP1730-14, GBVP1737-14, GBVP1733-14, GBVQ1000-13, GBVP1729-14, GBVA1052-11, GBVB451-11, GBVP1731-14, GBVA1053-11, GBVP1732-14, GBVP1736-14, GBVB452-11, GBVQ4588-13, GBVP1738-14 | GBVA1046-11, GBVA1047-11, GBVA1048-11, GBVA1049-11, GBVA1054-11, GBVA1055-11, GBVP1739-14, GBVP1740-14, GBVP1741-14, GBVP1742-14, GBVP1743-14, GBVP1744-14, GBVP1745-14, GBVP1746-14, GBVP1747-14, GBVP1748-14, GBVQ1562-13, GBVQ4070-13, GBVQ4588-13 |
| 37 | <i>Erodium carvifolium</i>                    | NC_015083.1 | HQ713469 | GBVS5367-13, GBVX1901-13                                                                                                                                                                                                                            | GBVS5367-13, GBVX1901-13                                                                                                                                                                                                                              |
|    | <i>Erodium texanum</i>                        | NC_014569.1 | HM125536 | GBVG1771-11, GBVS1633-13, GBVX1893-13                                                                                                                                                                                                               | GBVG1772-11, GBVG1773-11, GBVS1633-13, GBVX1893-13                                                                                                                                                                                                    |
| 38 | <i>Eucalyptus globulus subsp. globulus</i>    | NC_008115.1 | AY780259 | GBVH4959-11, GBVH4961-11, GBVH4962-11, GBVH4965-11, GBVH4966-11, GBVH4967-11, GBVX2260-15, GBVX2277-15, GBVX2279-15, GBVX2284-15, GENG050                                                                                                           | GBVH4960-11, GBVH4963-11, GBVH4964-11, GBVX1689-13, GENG018-11, GENG021-11, GENG088-12                                                                                                                                                                |
|    | <i>Eucalyptus grandis</i>                     | NC_014570.1 | HM347959 | GBVS1637-13, GBVX1844-13                                                                                                                                                                                                                            | GBVH4969-11, GBVS1637-13, GBVX1894-13                                                                                                                                                                                                                 |
| 39 | <i>Fagopyrum esculentum subsp. ancestrale</i> | NC_010776.1 | EU254477 | GBVI3462-11, GBVI3462-11, GBVT064-13, GBVT759-13                                                                                                                                                                                                    | GBVI3461-11, GBVI3463-11, GBVI3465-11, GBVR0008-13, GBVT1705-13                                                                                                                                                                                       |
|    | <i>Fagopyrum tataricum Daegwan3-3</i>         | NC_027161.1 | KM201427 | GBVI3498-11, GBVI3499-11, GBVI3500-11, GBVT067-13, GBVT758-13                                                                                                                                                                                       | GBVI3502-11, GBVR018-13, GBVT1706-13                                                                                                                                                                                                                  |
| 40 | <i>Fargesia nitida</i>                        | NC_024715.1 | JX513416 | GBVP2884-14, GBVX4875-15, GBVX7841-15, GRASS1406-10                                                                                                                                                                                                 | GBVX4875-15, GBVX7841-15, GRASS1406-10                                                                                                                                                                                                                |
|    | <i>Fargesia yunnanensis</i>                   | NC_024717.1 | JX513418 | GBVT2035-13, GBVT2036-13, GBVT2037-13, GBVX4877-15, GBVX7843-15                                                                                                                                                                                     | GBVT2130-13, GBVT2131-13, GBVT2132-13, GBVX4877-15, GBVX7843-15                                                                                                                                                                                       |
| 41 | <i>Festuca arundinacea</i>                    | NC_011713.2 | FJ466687 | GBVD3484-11, GBVD3486-11, GBVP6640-15, GBVP6685-15, GBVR2903-13, GBVW1898-13, GBVX1877-13, KSR314-07, PLGE124-13, POWNA1676-12, POWNA1678-12                                                                                                        | GBVD3485-11, GBVR2903-13, GBVX1877-13, GBVY2159-14, GBVY2161-14, PLGE124-13, POWNA1676-12, POWNA1678-12                                                                                                                                               |
|    | <i>Festuca pratensis</i>                      | NC_019650.1 | JX871941 | GBVD3494-11, GBVP6666-15, GBVW3313-13, GBVX1974-13, POWNA290-10, POWNA1549-12, POWNA1681-12                                                                                                                                                         | GBVD3495-11, GBVD3496-11, GBVW3313-13, GBVX1974-13, GBVY2168-14, POWNA290-10, POWNA1549-12, POWNA1681-12                                                                                                                                              |
| 42 | <i>Fragaria chiloensis</i>                    | NC_019601.1 | JN884816 | GBVT4225-13, GBVX1969-13                                                                                                                                                                                                                            | GBVT4225-13, GBVW1809-13, GBVX1969-13                                                                                                                                                                                                                 |
|    | <i>Fragaria vesca subsp. vesca</i>            | NC_015206.1 | JF345175 | GBVJ2287-11, GBVJ2290-11, GBVJ2291-11, POWNA297-10, POWNA1014-12, POWNA1143-12, POWNA2129-12, SCBI526-14                                                                                                                                            | GBVJ2288-11, GBVJ2289-11, GBVJ2292-11, POWNA297-10, POWNA1014-12, POWNA11433-12, POWNA2129-12, SCBI526-14                                                                                                                                             |
| 43 | <i>Fritillaria hupehensis</i>                 | NC_024736.1 | KF712486 | GBVC3498-11, GBVX5359-15, GBVX7856-15                                                                                                                                                                                                               | GBVX5359-15, GBVX7856-15                                                                                                                                                                                                                              |
|    | <i>Fritillaria taipaiensis</i>                | NC_023247.1 | KC543997 | GBVX5368-15                                                                                                                                                                                                                                         | GBVX5368-15                                                                                                                                                                                                                                           |
| 44 | <i>Gentiana crassicaulis</i>                  | NC_027442.1 | KJ676538 | GBVX2914-15, GBVX2915-15, GBVX2916-15, GBVX2917-15, GBVX2918-15, GBVX2919-15, GBVX2920-15, GBVX2921-15, GBVX2922-15,                                                                                                                                | GBVX2960-15, GBVX2961-15, GBVX2962-15, GBVX2963-15, GBVX2964-15, GBVX2965-15, GBVX2966-15, GBVX2967-15, GBVX2968-15                                                                                                                                   |
|    | <i>Gentiana straminea</i>                     | NC_027441.1 | KJ657732 | GBVX2923-15, GBVX2924-15, GBVX2925-15, GBVX2974-15                                                                                                                                                                                                  | GBVG1481-11, GBVX2969-15, GBVX2970-15, GBVX2971-15, GBVX3276-15                                                                                                                                                                                       |
| 45 | <i>Glycine falcata</i>                        | NC_021649.1 | KC893637 | GBVX2014-13                                                                                                                                                                                                                                         | GBVX2014-13                                                                                                                                                                                                                                           |
|    | <i>Glycine max</i>                            | NC_007942.1 | DQ317523 | GBVO203-11, GBVO205-11, GBVO206-11, GBVO207-11, GBVO208-11, GBVO209-11, GBVO210-11, GBVO211-11, GBVO212-11, GBVO213-11, GBVR2412-13, GBVX1815-13                                                                                                    | GBVO204-11, GBVO215-11, GBVO216-11, GBVO217-11, GBVO218-11, GBVO219-11, GBVO220-11, GBVO221-11, GBVO222-11, GBVO223-11, GBVR2412-13, GBVT3577-13, GBVX1815-13                                                                                         |
| 46 | <i>Gnetum montanum</i>                        | NC_021438.1 | KC427271 | GBVB561-11, GBVQ4239-13, GBVQ4597-13                                                                                                                                                                                                                | GBVA1227-11, GBVB62-11, GBVQ4239-13                                                                                                                                                                                                                   |
|    | <i>Gnetum parvifolium</i>                     | NC_011942.1 | AP009569 | GBVB563-11, GBVQ507-13, GBVQ4556-13                                                                                                                                                                                                                 | GBVA1232-11, GBVA1233-11, GBVB564-11, GBVB565-11, GBVB566-11, GBVQ507-13, GBVQ4556-13                                                                                                                                                                 |

|    |                                       |             |          |                                                                                                                      |                                                                                                        |
|----|---------------------------------------|-------------|----------|----------------------------------------------------------------------------------------------------------------------|--------------------------------------------------------------------------------------------------------|
| 47 | <i>Gossypium darwinii</i>             | NC_016670.1 | HQ325741 | GBVS2669-13, GBVX1932-13, MAPLT101-10, MAPLT102-10, MAPLT103-10, MAPLT104-10, MAPLT105-10                            | GBVS2669-13, GBVX1932-13, MAPLT101-10, MAPLT102-10, MAPLT103-10, MAPLT104-10, MAPLT105-10              |
|    | <i>Gossypium mustelinum</i>           | NC_016711.1 | HQ325743 | GBVS2671-13, GBVX1938-13, MAPLT096-10, MAPLT097-10, MAPLT098-10, MAPLT099-10, MAPLT100-10                            | GBVS2671-13, GBVX1938-13, MAPLT096-10, MAPLT097-10, MAPLT098-10, MAPLT099-10, MAPLT100-10              |
| 48 | <i>Haloxylon ammodendron</i>          | NC_027668.1 | KF534478 |                                                                                                                      | GBVE4030-11                                                                                            |
|    | <i>Haloxylon persicum</i>             | NC_027669.1 | KF534479 | GBVR4051-13                                                                                                          | GBVE4031-11, GBVE4069-13                                                                               |
| 49 | <i>Helianthus divaricatus</i>         | NC_023109.1 | KF746352 | SCBI483-14, SCBI486-14                                                                                               | SCBI483-14, SCBI486-14                                                                                 |
|    | <i>Helianthus tuberosus</i>           | NC_023112.1 | KF746361 | GBVO501-11, GBVO504-11, GBVR4569-13                                                                                  | GBVO502-11, GBVO503-11, GBVP2952-14                                                                    |
| 50 | <i>Hirtella physophora</i>            | NC_024066.1 | KJ414485 | GBVX7817-15                                                                                                          | GBVX7817-15                                                                                            |
|    | <i>Hirtella racemosa</i>              | NC_024060.1 | KJ414479 |                                                                                                                      |                                                                                                        |
| 51 | <i>Hordeum jubatum</i>                | NC_027476.1 | KM974741 | GBVD3649-11, GBVD3650-11, GBVX4440-15, GBVX4441-15, GRASS730-07, GRASS739-07, GRII010-08                             | GBVD3651-11, GBVW2870-13, GRASS730-07, GRASS739-07, GRII010-08                                         |
|    | <i>Hordeum vulgare subsp. vulgare</i> | NC_008590.1 | EF115541 | GBVD3754-11, GBVD3755-11, GBVR2597-13, GBVX1379-13, GBVX1834-13                                                      | GBVD3756-11, GBVR2597-13, GBVS3319-13, GBVX1379-13, GBVX1834-13                                        |
| 52 | <i>Indocalamus longiauritus</i>       | NC_015803.1 | HQ337795 | GBVD33779-11, GBVS2805-13, GBVT2041-13, GBVT2042-13, GBVT2043-13, GBVT2044-13, GBVT2045-13, GBVT2046-13, GBVX1914-13 | GBVS2805-13, GBVT2136-13, GBVT2137-13, GBVT2138-13, GBVT2139-13, GBVT2140-13, GBVT2141-13, GBVX1914-13 |
|    | <i>Indocalamus wilsonii</i>           | NC_024720.1 | JX513421 | GBVX4880-15, GBVX7846-15                                                                                             | GBVX4880-15, GBVX7846-15                                                                               |
| 53 | <i>lochroma stenanthum</i>            | NC_026574.1 | KP262399 |                                                                                                                      |                                                                                                        |
|    | <i>lochroma tingoanum</i>             | NC_027177.1 | KP280175 |                                                                                                                      |                                                                                                        |
| 54 | <i>Ipomoea batatas</i>                | NC_026703.1 | KP212149 | GBVK3552-11, GBVW2458-13, GBVW2459-13                                                                                | GBVK3553-11, GBVU4115-13, GBVW013-13, GBVW014-13, GBVW752-13                                           |
|    | <i>Ipomoea purpurea</i>               | NC_009808.1 | EU118126 | GBVK3577-11, GBVR2659-13, GBVX1859-13                                                                                | GBVK3574-11, GBVK3575-11, GBVK3576-11, GBVR2659-13, GBVX1859-13                                        |
| 55 | <i>Juniperus bermudiana</i>           | NC_024021.1 | KF866297 | GBVL4256-11                                                                                                          | GBVL4257-11                                                                                            |
|    | <i>Juniperus scopulorum</i>           | NC_024023.1 | KF866299 | GBVL4391-11                                                                                                          | GBVL4392-11                                                                                            |
| 56 | <i>Lathyrus clymenum</i>              | NC_027148.1 | KJ850235 | GBVO1158-11, GBVW2225-13                                                                                             | GBVO1159-11                                                                                            |
|    | <i>Lathyrus venosus</i>               | NC_027080.1 | KJ806202 | GBVW2254-13                                                                                                          | GBVW2180-13                                                                                            |
| 57 | <i>Licania alba</i>                   | NC_024064.1 | KJ414483 | GBVU4006-13                                                                                                          | GBVJ1499-11, GBVJ1500-11, GBVJ1501-11, GBVU1761-13                                                     |
|    | <i>Licania sprucei</i>                | NC_024065.1 | KJ414484 | GBVU4013-13                                                                                                          | GBVU2016-13                                                                                            |
| 58 | <i>Lilium hansonii</i>                | NC_027674.1 | KM103364 | GBVC3619-11, GBVC3620-11, GBVS4354-13, GBVS4355-13, GBVS4356-13, GBVS4357-13, GBVT2676-13                            | GBVC3621-11, GBVT2765-13, GBVW3511-13                                                                  |
|    | <i>Lilium superbum</i>                | NC_026787.1 | KP462883 | GBVC3686-11, GBVC3687-11, GBVS2065-13                                                                                | GBVC3688-11, GBVC3689-11, GBVS2104-13                                                                  |
| 59 | <i>Lolium multiflorum</i>             | NC_019651.1 | JX871942 | GBVP6667-15, GBVR3374-13, GBVW3314, GBVX1975-13, GRASS977-07, PLGE092-13                                             | GBVR3166-13, GBVS3336-13, GBVW3314-13, GBVX1975-13, GBVY2704-14, GRASS977-07, PLGE092-13               |

|    |                                       |             |          |                                                                                                                                                                                                                  |                                                                                                                                                                                                                         |
|----|---------------------------------------|-------------|----------|------------------------------------------------------------------------------------------------------------------------------------------------------------------------------------------------------------------|-------------------------------------------------------------------------------------------------------------------------------------------------------------------------------------------------------------------------|
|    | <i>Lolium perenne</i>                 | NC_009950.1 | AM777385 | GBVD3985-11, GBVD387-11, GBVD3988-11, GBVD3989-11, GBVR1869-13, GBVS1365-13, GBVV1902-13, GBVX1861-13, GRASS808-07, GRASS986-07, GRASS1020-07, PLGE016-13, POWNA434-10, POWNA1651-12, POWNA2644-12, POWNA2645-12 | GBVD3986-11, GBVD3990-11, GBVR1869-13, GBVS929-13, GBVS3313-13, GBVX1861-13, GBVY2705-14, GRASS808-07, GRASS986-07, GRASS1020-07, KSR116-07, PLGE016-13, POWNA434-10, POWNA2644-12, POWNA2645-12                        |
| 60 | <i>Lupinus albus</i>                  | NC_026681.1 | -        |                                                                                                                                                                                                                  | GBVO1557-11, GBVO1558-11                                                                                                                                                                                                |
|    | <i>Lupinus luteus</i>                 | NC_023090.1 | KC695666 | GBVO1575-11                                                                                                                                                                                                      | GBVO1576-11, GBVO1577-11                                                                                                                                                                                                |
| 61 | <i>Magnolia grandiflora</i>           | NC_020318.1 | JN867584 | GBVH1380-11, GBVX1982-13, GBVH1376-11, GBVT810-13, GBVX6048-15, GBVT4120-13, GBVH1389-11, GBVT811-13, GBVT809-13, GBVH1383-11, HOSAM069-10, GBVH1382-11, GBVT4119-13, GBVH1384-11, GBVH1378-11                   | GBVH1377-11, GBVH1379-11, GBVH1381-11, GBVH1385-11, GBVH1386-11, GBVH1387-11, GBVH1388-11, GBVH1390-11, GBVT4119-13, GBVT4120-13, GBVT889-13, GBVT890-13, GBVT891-13, GBVX1982-13, GBVX5881-15, GENG531-14, HOSAM069-10 |
|    | <i>Magnolia kwangsiensis</i>          | NC_015892.1 | HM775382 | GBVH1408-11, GBVH1409-11, GBVH1410-11, GBVH1411-11, GBVH1504-11, GBVS1791-13, GBVT839-13, GBVT853-13, GBVX1921-13                                                                                                | GBVH1412-11, GBVS1791-13, GBVX1921-13                                                                                                                                                                                   |
| 62 | <i>Masdevallia coccinea</i>           | NC_026541.1 | KP205432 |                                                                                                                                                                                                                  |                                                                                                                                                                                                                         |
|    | <i>Masdevallia picturata</i>          | NC_026777.1 | KJ566305 |                                                                                                                                                                                                                  |                                                                                                                                                                                                                         |
| 63 | <i>Medicago hybrida</i>               | NC_027153.1 | KJ850240 | GBVO1726-11                                                                                                                                                                                                      |                                                                                                                                                                                                                         |
|    | <i>Medicago papillosa</i>             | NC_027154.1 | KJ850241 | GBVO1748-11                                                                                                                                                                                                      |                                                                                                                                                                                                                         |
| 64 | <i>Melica mutica</i>                  | NC_027477.1 | KM974742 | GBVD4024-11                                                                                                                                                                                                      | GBVD4023-11                                                                                                                                                                                                             |
|    | <i>Melica subulata</i>                | NC_027478.1 | KM974743 |                                                                                                                                                                                                                  | GRASS972-07, GRASS991-07, GRASS1028-07, GRASS1040-07, GRASS1210-07, GRASS1249-07                                                                                                                                        |
| 65 | <i>Morus indica</i>                   | NC_008359.1 | DQ226511 | GBVL516-11, GBVR2397-13, GBVX1829-13, GBVX6296-15, GBVX6298-15, GBVX6300-15, GBVX6302-15, GBVX6303-15, GBVX6305-15, GBVX6306-15                                                                                  | GBVL517-11, GBVR2397-13, GBVX1829-13                                                                                                                                                                                    |
|    | <i>Morus mongolica</i>                | NC_025772.2 | KM491711 | GBVX7406-15, GBVX7895-15                                                                                                                                                                                         | GBVX7406-15, GBVX7895-15                                                                                                                                                                                                |
| 66 | <i>Nelumbo lutea</i>                  | NC_015605.1 | FJ754269 | GBVI1010-11, GBVR2912-13, GBVU508-13, GBVX1909-13                                                                                                                                                                | GBVI1009-11, GBVI1011-11, GBVI1012-11, GBVR2912-13, GBVU508-13, GBVX1909-13                                                                                                                                             |
|    | <i>Nelumbo nucifera</i>               | NC_025339.1 | KF009944 | CPBOL2166-11, CPBOL2168-11, GBVI1013-11, GBVI1015-11, GBVI1017-11, GBVP8284-15, GBVR2913-13, GBVT2414-13, GBVT2415-13, GBVT2416-13, GBVT2417-13, GBVU509-13, GBVX1388-13, GBVX1911-13, GBVX7424-15, GBVX7882-15  | CPBOL2168-11, GBVI1014-11, GBVI1016-11, GBVI1018-11, GBVR2913-13, GBVT2575-13, GBVT2576-13, GBVT2577-13, GBVT2578-13, GBVU509-13, GBVX1388-13, GBVX1911-13, GBVX7424-15, GBVX7882-15, GENG797-14                        |
| 67 | <i>Nicotiana glauca</i>               | NC_007500.1 | AB237912 | GBVK4272-11, GBVK4273-11, GBVR124-13, GBVX1811-13                                                                                                                                                                | GBVK4274-11, GBVR4274-11, GBVR124-13, GBVX1811-13, GBVX6650-15                                                                                                                                                          |
|    | <i>Nicotiana glauca</i>               | NC_001879.2 | -        | GBVK4277-11, GBVT1393-13, GBVX1794-13, GBVX2025-13, GBVX6357-15                                                                                                                                                  | GBVK4278-11, GBVT1451-13, GBVW2970-13, GBVX1202-13, GBVX1794-13, GBVX2025-13, GBVX6651-15                                                                                                                               |
| 68 | <i>Nymphaea alba</i>                  | NC_006050.1 | AJ627251 | GBVI1050-11, GBVR1769-13, GBVS1378-13, GBVX1805-13, POWNA1754-12, POWNA1746-12, POWNA1910-12, POWNB040-10                                                                                                        | GBVI1051-11, GBVP1965-14, GBVR1769-13, GBVS956-13, GBVX1805-13, POWNA1745-12, POWNA1910-12, POWNB040-10                                                                                                                 |
|    | <i>Nymphaea mexicana</i>              | NC_024542.1 | KF753633 | GBVX2780-15                                                                                                                                                                                                      | GBVX2780-15                                                                                                                                                                                                             |
| 69 | <i>Oenothera argillicola</i>          | NC_010358.1 | EU262887 | GBVR2708-15, GBVX1867-13                                                                                                                                                                                         | GBVR2708-13, GBVX1867-13                                                                                                                                                                                                |
|    | <i>Oenothera elata subsp. hookeri</i> | NC_002693.2 | -        | GBVR1714-13, GBVX1796-13                                                                                                                                                                                         | GBVR1714-13, GBVX1796-13                                                                                                                                                                                                |
| 70 | <i>Olea europaea subsp. europaea</i>  | NC_015401.1 | FN997650 | GBVK2600-11, GBVK2601-11, GBVK2602-11, GBVK2603-11, GBVK2604-11, GBVK2605-11, GBVK2606-11, GBVK2607-11, GBVK2608-11, GBVK2609-11, GBVR3395-13, GBVR3968-13, GBVR3969-13, GBVS1572-13, GBVX1906-13                | GBVR3395-13, GBVR3968-13, GBVR3969-13, GBVS1572-13, GBVX1906-13                                                                                                                                                         |
|    | <i>Olea woodiana subsp. woodiana</i>  | NC_015608.1 | FN998901 | GBVK2631-11, GBVR3971-13, GBVX1910-13                                                                                                                                                                            | GBVR3971-13, GBVX1910-13                                                                                                                                                                                                |

|    |                                                |             |          |                                                                                                                                                                                                                                                                                                                                                                                                                                                                                                                                                                |                                                                                                                                                                                                                                                                                                                                                                                                                                                                                                                         |
|----|------------------------------------------------|-------------|----------|----------------------------------------------------------------------------------------------------------------------------------------------------------------------------------------------------------------------------------------------------------------------------------------------------------------------------------------------------------------------------------------------------------------------------------------------------------------------------------------------------------------------------------------------------------------|-------------------------------------------------------------------------------------------------------------------------------------------------------------------------------------------------------------------------------------------------------------------------------------------------------------------------------------------------------------------------------------------------------------------------------------------------------------------------------------------------------------------------|
| 71 | <i>Orobanche californica</i>                   | NC_025651.1 | HG515539 | GBVP6268-15, GBVP7273-15                                                                                                                                                                                                                                                                                                                                                                                                                                                                                                                                       | GBVK3089-11, GBVP6268-15, GBVP7273-15                                                                                                                                                                                                                                                                                                                                                                                                                                                                                   |
|    | <i>Orobanche crenata</i>                       | NC_024845.1 | HG515537 | GBVK3101-11, GBVP5951-15, GBVP7070-15                                                                                                                                                                                                                                                                                                                                                                                                                                                                                                                          | GBVK3102-11, GBVK3103-11, GBVK3104-11, GBVK3105-11, GBVK3106-11, GBVK3107-11, GBVK3108-11                                                                                                                                                                                                                                                                                                                                                                                                                               |
| 72 | <i>Oryza australiensis</i>                     | NC_024608.1 | KJ830774 | GBVD4224-11, GBVR4559-13, GBVX6566-15                                                                                                                                                                                                                                                                                                                                                                                                                                                                                                                          | GBVR4559-13, GBVX6566-15                                                                                                                                                                                                                                                                                                                                                                                                                                                                                                |
|    | <i>Oryza rufipogon</i>                         | NC_017835.1 | JN005832 | GBVD4250-11, GBVD4251-11, GBVP8430-15, GBVP8431-15, GBVP8432-15, GBVP8433-15, GBVP8434-15, GBVP8435-15, GBVP8436-15, GBVP8437-15, GBVP8438-15, GBVP8439-15, GBVP8440-15, GBVT700-13, GBVT701-13, GBVX1952-13, GBVX2105-15, GBVX2106-15, GBVX2107-15, GBVX2108-15, GBVX2109-15, GBVX2110-15, GBVX2111-15, GBVX2112-15, GBVX2113-15, GBVX2114-15, GBVX2115-15, GBVX2116-15, GBVX2117-15, GBVX2118-15, GBVX2119-15, GBVX2120-15, GBVX2121-15, GBVX2641-15, GBVX2642-15, GBVX2643-15, GBVX2644-15, GBVX2645-15, GBVX2646-15, GBVX2647-15, GBVX2648-15, GBVX7407-15 | GBVT700-13, GBVT701-13, GBVX1952-13, GBVX2078-15, GBVX2079-15, GBVX2080-15, GBVX2081-15, GBVX2082-15, GBVX2122-15, GBVX2123-15, GBVX2124-15, GBVX2125-15, GBVX2126-15, GBVX2127-15, GBVX2128-15, GBVX2129-15, GBVX2130-15, GBVX2131-15, GBVX2132-15, GBVX2133-15, GBVX2134-15, GBVX2135-15, GBVX2136-15, GBVX2137-15, GBVX2138-15, GBVX2139-15, GBVX2140-15, GBVX2141-15, GBVX2142-15, GBVX2143-15, GBVX2144-15, GBVX2145-15, GBVX2146-15, GBVX2147-15, GBVX2148-15, GBVX2715-15, GBVX2716-15, GBVX2717-15, GBVX2718-15 |
| 73 | <i>Pachycladon cheesemaniae</i>                | NC_021102.1 | JQ806762 | GBVU3860-13, GBVX1996-13                                                                                                                                                                                                                                                                                                                                                                                                                                                                                                                                       | GBVU3860-13, GBVX1996-13                                                                                                                                                                                                                                                                                                                                                                                                                                                                                                |
|    | <i>Pachycladon ensyis</i>                      | NC_018565.1 | JX205495 | GBVW1153-13, GBVX1965-13                                                                                                                                                                                                                                                                                                                                                                                                                                                                                                                                       | GBVE3384-11, GBVW1153-13, GBVX1965-13                                                                                                                                                                                                                                                                                                                                                                                                                                                                                   |
| 74 | <i>Panax ginseng</i>                           | NC_006290.1 | AY582139 | GBVE1679-11, GBVE1680-11, GBVE1681-11, GBVE1683-11, GBVE1685-11, GBVE1686-11, GBVR056-13, GBVR2216-13, GBVW3847-13, GBVX1807-13, GBVX3234-15, GBVX3235-15, GBVX5223-15, GBVX5363-15, GBVX7877-15                                                                                                                                                                                                                                                                                                                                                               | GBVE1682-11, GBVE1684-11, GBVE1687-11, GBVR2216-13, GBVT388-13, GBVT389-13, GBVX1807-13, GBVX3256-15, GBVX3257-15, GBVX5223-15                                                                                                                                                                                                                                                                                                                                                                                          |
|    | <i>Panax notoginseng</i>                       | NC_026447.1 | KJ566590 | GBVE1794-11, GBVE1795-11, GBVE1796-11, GBVE1798-11, GBVE1799-11, GBVE1800-11, GBVE1801-11, GBVR059-13, GBVW2685-13, GBVW3848-13, GBVW3849-13, GBVW3850-13, GBVW3851-13, GBVX3240-15, GBVX3241-15, GBVX3241-15, GBVX3242-15, GBVX6136-15                                                                                                                                                                                                                                                                                                                        | GBVE1797-11, GBVE1802-11, GBVE1803-11, GBVT390-13, GBVX3262-15, GBVX3263-15, GBVX3264-15, GBVX6136-15                                                                                                                                                                                                                                                                                                                                                                                                                   |
| 75 | <i>Paphiopedilum armeniacum</i>                | NC_026779.1 | KJ566307 | GBVB4880-11                                                                                                                                                                                                                                                                                                                                                                                                                                                                                                                                                    |                                                                                                                                                                                                                                                                                                                                                                                                                                                                                                                         |
|    | <i>Paphiopedilum niveum</i>                    | NC_026776.1 | KJ524105 | GBVU4146-13                                                                                                                                                                                                                                                                                                                                                                                                                                                                                                                                                    |                                                                                                                                                                                                                                                                                                                                                                                                                                                                                                                         |
| 76 | <i>Pariana campestris</i>                      | NC_027491.1 | KP319244 |                                                                                                                                                                                                                                                                                                                                                                                                                                                                                                                                                                |                                                                                                                                                                                                                                                                                                                                                                                                                                                                                                                         |
|    | <i>Pariana radiceflora</i>                     | NC_026972.1 | KJ871004 | GBVD4370-11                                                                                                                                                                                                                                                                                                                                                                                                                                                                                                                                                    | GBVD4371-11                                                                                                                                                                                                                                                                                                                                                                                                                                                                                                             |
| 77 | <i>Pelargonium alternans</i>                   | NC_023261.1 | KF240617 | GBVU1273-13                                                                                                                                                                                                                                                                                                                                                                                                                                                                                                                                                    | GBVU1330-13                                                                                                                                                                                                                                                                                                                                                                                                                                                                                                             |
|    | <i>Pelargonium x hortorum</i>                  | NC_008454.1 | DQ897681 | GBVG1833-11                                                                                                                                                                                                                                                                                                                                                                                                                                                                                                                                                    | GBVG001-11, GBVG002-11, GBVG1834-11, GBVG1835-11, GBVP2937-14                                                                                                                                                                                                                                                                                                                                                                                                                                                           |
| 78 | <i>Phalaenopsis aphrodite subsp. formosana</i> | NC_007499.1 | AY916449 | GBVR2310-13, GBVX1810-13                                                                                                                                                                                                                                                                                                                                                                                                                                                                                                                                       | GBVR2310-13, GBVX1810-13                                                                                                                                                                                                                                                                                                                                                                                                                                                                                                |
|    | <i>Phalaenopsis equestris</i>                  | NC_017609.1 | JF719062 | GBVC092-11, GBVS4524-13, GBVX1951-13                                                                                                                                                                                                                                                                                                                                                                                                                                                                                                                           | GBVC093-11, GBVS4524-13, GBVX1951-13                                                                                                                                                                                                                                                                                                                                                                                                                                                                                    |
| 79 | <i>Pharus lappulaceus</i>                      | NC_023245.1 | KC311467 | GBVP2889-14                                                                                                                                                                                                                                                                                                                                                                                                                                                                                                                                                    | GBVY3240-14                                                                                                                                                                                                                                                                                                                                                                                                                                                                                                             |
|    | <i>Pharus latifolius</i>                       | NC_021372.1 | JN032131 | GBVD4409-11, GBVT766-13, GBVX1999-13                                                                                                                                                                                                                                                                                                                                                                                                                                                                                                                           | GBVD4410-11, GBVT766-13, GBVW3731-13, GBVW3732-13, GBVX1999-13                                                                                                                                                                                                                                                                                                                                                                                                                                                          |
| 80 | <i>Phyllostachys nigra var. henonis</i>        | NC_015826.1 | HQ154129 | GBVS2021-13, GBVX1917-13                                                                                                                                                                                                                                                                                                                                                                                                                                                                                                                                       | GBVS2021-13, GBVS3306-13, GBVX1917-13                                                                                                                                                                                                                                                                                                                                                                                                                                                                                   |
|    | <i>Phyllostachys</i>                           | NC_016699.1 | JN415113 | GBVT2655-13, GBVX1936-13                                                                                                                                                                                                                                                                                                                                                                                                                                                                                                                                       | GBVT2655-13, GBVX1936-13                                                                                                                                                                                                                                                                                                                                                                                                                                                                                                |

|    |                             |             |          |                                                                                                                                                                                                                                                          |                                                                                                                                                                                                                                                                                     |
|----|-----------------------------|-------------|----------|----------------------------------------------------------------------------------------------------------------------------------------------------------------------------------------------------------------------------------------------------------|-------------------------------------------------------------------------------------------------------------------------------------------------------------------------------------------------------------------------------------------------------------------------------------|
|    | <i>propinqua</i>            |             |          |                                                                                                                                                                                                                                                          |                                                                                                                                                                                                                                                                                     |
| 81 | <i>Picea abies</i>          | NC_021456.1 | HF937082 | GBVL4636-11, GBVL4637-11, GBVL4645-11, GBVL4647-11, GBVQ038-13, GBVQ576-13, GBVQ618-13, GBVQ838-13, GBVQ1018-13, GBVQ2646-13, GBVQ2647-13, GBVQ2648-13, GBVQ4601-13                                                                                      | GBVL4635-11, GBVL4638-11, GBVL4639-11, GBVL4640-11, GBVL4641-11, GBVL4642-11, GBVL4643-11, GBVL4644-11, GBVL4646-11, GBVL4648-11, GBVQ490-13, GBVQ828-13, GBVQ1018-13, GBVQ2770-13, GBVQ2771-13, GBVQ2772-13, GBVQ4601-13                                                           |
|    | <i>Picea morrisonicola</i>  | NC_016069.1 | AB480556 | GBVL4801-11, GBVL4803-11, GBVL4805-11, GBVL4806-11, GBVQ596-13                                                                                                                                                                                           | GBVL4802-11, GBVL4804-11, GBVL4807-11, GBVL4808-11                                                                                                                                                                                                                                  |
| 82 | <i>Pinus monophylla</i>     | NC_011158.4 | EU998745 | GBVM305-11, GBVM307-11, GBVM309-11, GBVM3011-11, GBVQ635-13, GBVQ3567-13, GBVQ3568-13, GBVQ3569-13, GBVQ4553-13                                                                                                                                          | GBVM306-11, GBVM308-11, GBVM310-11, GBVQ635-13, GBVQ4553-13                                                                                                                                                                                                                         |
|    | <i>Pinus thunbergii</i>     | NC_001631.1 | D17510   | CPBOL3065-11, CPBOL3067-11, CPBOL3069-11, GBVM575-11, GBVQ666-13, GBVQ1287-13, GBVQ2676-13, GBVQ2677-13, GBVQ4520-13                                                                                                                                     | CPBOL3065-11, CPBOL3067-11, CPBOL3069-11, GBVM576-11, GBVQ666-13, GBVQ1295-13, GBVQ2800-13, GBVQ2801-13, GBVQ4520-13                                                                                                                                                                |
| 83 | <i>Podocarpus lambertii</i> | NC_023805.1 | KJ010812 | GBVM908-11                                                                                                                                                                                                                                               | GBVM909-11, GBVQ1670-13, GBVY3455-14, GBVY3456-14, GBVY3457-14                                                                                                                                                                                                                      |
|    | <i>Podocarpus totara</i>    | NC_020361.1 | KC306742 | GBVM994-11, GBVM995-11, GBVQ4217-13, GBVQ4592-13                                                                                                                                                                                                         | GBVM996-6, GBVM997-6, GBVM998-6, GBVM999-6, GBVQ1708-13, GBVQ1708-13, GBVQ4217-13, GBVQ4592-13, GBVY3542-14, GBVY3543-14, GBVY3544-14                                                                                                                                               |
| 84 | <i>Populus euphratica</i>   | NC_024747.1 | KJ624919 | GBVX5400-15, GBVX6348-15, GBVX7857-15, HOSAM117-11                                                                                                                                                                                                       | GBVJ4753-11, GBVJ4754-11, GBVX6348-15, GBVX7857-15, HOSAM117-11                                                                                                                                                                                                                     |
|    | <i>Populus tremula</i>      | NC_027425.1 | KP861984 | GBVJ4777-11, GBVJ4781-11, GBVJ4782-11, GBVJ4783-11, GBVJ4784-11, GBVJ4785-11, GBVJ4786-11, GBVJ4787-11, GBVJ4788-11, GBVJ4789-11, GBVS1398-13, GBVX5414-15, POWNA552-10, POWNA2037-12, POWNA3038-12, POWNB075-10, POWNB158-10                            | GBVJ4778-11, GBVJ4779-11, GBVJ4780-11, GBVJ4790-11, GBVS992-13, POWNA552-10, POWNA2037-12, POWNA3083-12, POWNB075-10, POWNB158-10                                                                                                                                                   |
| 85 | <i>Prunus padus</i>         | NC_026982.1 | KP760072 | GBVS2282-13, GBVS2283-13, POWNA569-10, POWNA2161-12, POWNA2790-12                                                                                                                                                                                        | GBVJ2570-11, GBVS2540-13, GBVS2541-13, POWNA569-10, POWNA2161-12, POWNA2789-12, POWNA2790-12                                                                                                                                                                                        |
|    | <i>Prunus persica</i>       | NC_014697.1 | HQ336405 | CPBOL3404-11, CPBOL3405-11, CPBOL3406-11, CPBOL3407-11, GBVJ2574-11, GBVJ2575-11, GBVJ2579-11, GBVS1216-13, GBVS2289-13, GBVS2290-13, GBVS2291-13, GBVS2292-13, GBVS2293-13, GBVS2294-13, GBVS2295-13, GBVS2760-13, GBVX1899-13, KNPA1051-09, ZLPP049-13 | CPBOL3404-11, CPBOL3405-11, CPBOL3406-11, CPBOL3407-11, GBVJ2576-11, GBVJ2577-11, GBVJ2578-11, GBVJ2580-11, GBVJ2581-11, GBVS1003-13, GBVS2544-13, GBVS2545-13, GBVS2546-13, GBVS2547-13, GBVS2548-13, GBVS2549-13, GBVS2550-13, GBVS2560-13, GBVT1461-13, GBVX1899-13, KNPA1051-09 |
| 86 | <i>Pyrus pyrifolia</i>      | NC_015996.1 | AP012207 | GBVJ2661-11, GBVR1903-13, GBVU696-13, GBVX1926-13                                                                                                                                                                                                        | GBVJ2662-11, GBVR1903-13, GBVU867-13, GBVX1926-13                                                                                                                                                                                                                                   |
|    | <i>Pyrus spinosa</i>        | NC_023130.1 | HG737342 | GBVP2776-14                                                                                                                                                                                                                                              | GBVP2776-14                                                                                                                                                                                                                                                                         |
| 87 | <i>Quercus aliena</i>       | NC_026790.1 | KP301144 | GBVG9085-11, GBVG9086-11, GBVG9087-11, GBVG9088-11, GBVG9089-11                                                                                                                                                                                          | GBVG090-11                                                                                                                                                                                                                                                                          |
|    | <i>Quercus rubra</i>        | NC_020152.1 | JX970937 | GBVG9356-11, GBVG9359-11, GBVG9360-11, GBVG9361-11, GBVG9362-11, GBVG9366-11, GBVG9367-11, GBVG9368-11, GBVS271-13, GBVW3648-13, GBVX1979-13, VEMSH084-13, WABLK112-13, WABLK194-13                                                                      | GBVG355-11, GBVG357-11, GBVG358-11, GBVG363-11, GBVG364-11, GBVG365-11, GBVW3648-13, GBVX1979-13, KSR494-08, VEMSH084-13, WABLK112-13, WABLK194-13                                                                                                                                  |
| 88 | <i>Salicornia bigelovii</i> | NC_027226.1 | KJ629117 |                                                                                                                                                                                                                                                          |                                                                                                                                                                                                                                                                                     |
|    | <i>Salicornia brachiata</i> | NC_027224.1 | KJ629115 |                                                                                                                                                                                                                                                          |                                                                                                                                                                                                                                                                                     |
| 89 | <i>Salix interior</i>       | NC_024681.1 | KJ742926 | GBVX6520-15, GBVX7837-15, SALIX112-08, SALIX183-08, SALIX254-08, SALIX265-08, SALIX317-08, SALIX331-08, SALIX336-08, SALIX337-08, SALIX525-08                                                                                                            | GBVJ4931-11, GBVX6520-15, GBVX7837-15, SALIX112-08, SALIX183-08, SALIX218-08, SALIX254-08, SALIX265-08, SALIX317-08, SALIX331-08, SALIX336-08, SALIX337-08, SALIX338-08, SALIX525-08, VEMSH070-13                                                                                   |
|    | <i>Salix purpurea</i>       | NC_026722.1 | KP019639 | GBVJ4991-11, GBVJ4992-11, GBVJ4993-11, POWNA644-10, POWNA1701-12, POWNA1702-12                                                                                                                                                                           | GBVJ4989-11, GBVJ4990-11, GBVJ4994-11, POWNA644-10, POWNA1701-12, POWNA1702-12                                                                                                                                                                                                      |
| 90 | <i>Sartidia dewinteri</i>   | NC_027147.1 | KJ819550 |                                                                                                                                                                                                                                                          |                                                                                                                                                                                                                                                                                     |
|    | <i>Sartidia perrieri</i>    | NC_027146.1 | KJ819549 |                                                                                                                                                                                                                                                          |                                                                                                                                                                                                                                                                                     |
| 91 | <i>Sedum sarmentosum</i>    | NC_023085.1 | JX427551 | GBVJ1726-11                                                                                                                                                                                                                                              | GBVJ1727-11, VGBVJ1728-11                                                                                                                                                                                                                                                           |
|    | <i>Sedum takesimense</i>    | NC_026065.1 | KF954541 | GBVX5421-15, GBVX7901-15                                                                                                                                                                                                                                 | GBVX5421-15, GBVX7901-15                                                                                                                                                                                                                                                            |

|     |                                 |             |          |                                                                                                                                                                                                                                                                                                                                                                                                                                                                                                                                                                                                                                                                                                                                                                                                                                                                                                                                                                                                                                                                                                                                                                                                                                                                                                                                                                                                                                                                                                                                                                                                                                                                                                                                                                                                                                                                       |                                                                                                                                                                                                                                                                                                                                                                                                                                                                                                                                                                                                                                                                                                                                                                                                           |
|-----|---------------------------------|-------------|----------|-----------------------------------------------------------------------------------------------------------------------------------------------------------------------------------------------------------------------------------------------------------------------------------------------------------------------------------------------------------------------------------------------------------------------------------------------------------------------------------------------------------------------------------------------------------------------------------------------------------------------------------------------------------------------------------------------------------------------------------------------------------------------------------------------------------------------------------------------------------------------------------------------------------------------------------------------------------------------------------------------------------------------------------------------------------------------------------------------------------------------------------------------------------------------------------------------------------------------------------------------------------------------------------------------------------------------------------------------------------------------------------------------------------------------------------------------------------------------------------------------------------------------------------------------------------------------------------------------------------------------------------------------------------------------------------------------------------------------------------------------------------------------------------------------------------------------------------------------------------------------|-----------------------------------------------------------------------------------------------------------------------------------------------------------------------------------------------------------------------------------------------------------------------------------------------------------------------------------------------------------------------------------------------------------------------------------------------------------------------------------------------------------------------------------------------------------------------------------------------------------------------------------------------------------------------------------------------------------------------------------------------------------------------------------------------------------|
| 92  | <i>Silene latifolia</i>         | NC_016730.1 | JF715055 | GBVF311-11, GBVF312-11, GBVF313-11, GBVF314-11, GBVF315-11, GBVF316-11, GBVF317-11, GBVF318-11, GBVF319-11, GBVF320-11, GBVF321-11, GBVF322-11, GBVF324-11, GBVF325-11, GBVF326-11, GBVF327-11, GBVF328-11, GBVF329-11, GBVF330-11, GBVF331-11, GBVF332-11, GBVF333-11, GBVF334-11, GBVF335-11, GBVF336-11, GBVF337-11, GBVF338-11, GBVF339-11, GBVF340-11, GBVF341-11, GBVF342-11, GBVF343-11, GBVF344-11, GBVF345-11, GBVF346-11, GBVF347-11, GBVF348-11, GBVF349-11, GBVF350-11, GBVF351-11, GBVF352-11, GBVF353-11, GBVF354-11, GBVF355-11, GBVF356-11, GBVF357-11, GBVF358-11, GBVF359-11, GBVF360-11, GBVF361-11, GBVF362-11, GBVF363-11, GBVF364-11, GBVF365-11, GBVF366-11, GBVF367-11, GBVF368-11, GBVF369-11, GBVF370-11, GBVF371-11, GBVF372-11, GBVF373-11, GBVF374-11, GBVF375-11, GBVF376-11, GBVF377-11, GBVF378-11, GBVF379-11, GBVF380-11, GBVF381-11, GBVF382-11, GBVF383-11, GBVF384-11, GBVF385-11, GBVF386-11, GBVF387-11, GBVF388-11, GBVF389-11, GBVF390-11, GBVF391-11, GBVF392-11, GBVF393-11, GBVF394-11, GBVF395-11, GBVF396-11, GBVF397-11, GBVF398-11, GBVF399-11, GBVF401-11, GBVF402-11, GBVF403-11, GBVF404-11, GBVF405-11, GBVF406-11, GBVF407-11, GBVF408-11, GBVF409-11, GBVF410-11, GBVF411-11, GBVF412-11, GBVF413-11, GBVF414-11, GBVF415-11, GBVF416-11, GBVF417-11, GBVF418-11, GBVF419-11, GBVF420-11, GBVF421-11, GBVF422-11, GBVF423-11, GBVF424-11, GBVF425-11, GBVF426-11, GBVF427-11, GBVF428-11, GBVF429-11, GBVF430-11, GBVF431-11, GBVF432-11, GBVF433-11, GBVF434-11, GBVF435-11, GBVF436-11, GBVF437-11, GBVF438-11, GBVF439-11, GBVF440-11, GBVF441-11, GBVF442-11, GBVF443-11, GBVF444-11, GBVF445-11, GBVF446-11, GBVF447-11, GBVF448-11, GBVF449-11, GBVF450-11, GBVS4481-13, GBVW2425-13, GBVX1944-13, KSR049-07, MKPCH562-09, POWNA1709-12, POWNA1710-12, POWNA681-10, POWNB104-10, RRPLA033-15, VEMSH201-13 | GBVF310-11, GBVF323-11, GBVF400-11, GBVF401-11, GBVF402-11, GBVF403-11, GBVF404-11, GBVF405-11, GBVF406-11, GBVF407-11, GBVF408-11, GBVF409-11, GBVF410-11, GBVF411-11, GBVF412-11, GBVF413-11, GBVF414-11, GBVF415-11, GBVF416-11, GBVF417-11, GBVF418-11, GBVF419-11, GBVF420-11, GBVF421-11, GBVF422-11, GBVF423-11, GBVF424-11, GBVF425-11, GBVF426-11, GBVF427-11, GBVF428-11, GBVF429-11, GBVF430-11, GBVF431-11, GBVF432-11, GBVF433-11, GBVF434-11, GBVF435-11, GBVF436-11, GBVF437-11, GBVF438-11, GBVF439-11, GBVF440-11, GBVF441-11, GBVF442-11, GBVF443-11, GBVF444-11, GBVF445-11, GBVF446-11, GBVF447-11, GBVF448-11, GBVF449-11, GBVF450-11, GBVS4481-13, GBVW2425-13, GBVX1944-13, KSR049-07, MKPCH562-09, POWNA1709-12, POWNA1710-12, POWNA681-10, POWNB104-10, RRPLA033-15, VEMSH201-13 |
|     | <i>Silene vulgaris</i>          | NC_016727.1 | JF715057 | GBVF545-11, GBVF546-11, GBVF547-11, GBVF548-11, GBVF549-11, GBVF550-11, GBVF551-11, GBVF552-11, GBVF553-11, GBVF554-11, GBVF556-11, GBVF557-11, GBVF558-11, GBVS4483-13, GBVX1941-13                                                                                                                                                                                                                                                                                                                                                                                                                                                                                                                                                                                                                                                                                                                                                                                                                                                                                                                                                                                                                                                                                                                                                                                                                                                                                                                                                                                                                                                                                                                                                                                                                                                                                  | GBVF541-11, GBVF542-11, GBVF543-11, GBVF544-11, GBVF555-11, GBVS4483-13, GBVX1941-13, POWNA1714-12, POWNA685-10, VEMSH090-13                                                                                                                                                                                                                                                                                                                                                                                                                                                                                                                                                                                                                                                                              |
| 93  | <i>Solanum bulbocastanum</i>    | NC_007943.1 | DQ347958 | GBVK4514-11, GBVR2414-13, GBVX1816-13                                                                                                                                                                                                                                                                                                                                                                                                                                                                                                                                                                                                                                                                                                                                                                                                                                                                                                                                                                                                                                                                                                                                                                                                                                                                                                                                                                                                                                                                                                                                                                                                                                                                                                                                                                                                                                 | GBVR2414-13, GBVX1816-13                                                                                                                                                                                                                                                                                                                                                                                                                                                                                                                                                                                                                                                                                                                                                                                  |
|     | <i>Solanum tuberosum</i>        | NC_008096.2 | DQ386163 | GBVK4655-11, GBVK4656-11, GBVK4657-11, GBVK4658-11, GBVR2398-13, GBVR2420-13, GBVS4535-13, GBVS4536-13, GBVX1820-13, GBVX6354-15                                                                                                                                                                                                                                                                                                                                                                                                                                                                                                                                                                                                                                                                                                                                                                                                                                                                                                                                                                                                                                                                                                                                                                                                                                                                                                                                                                                                                                                                                                                                                                                                                                                                                                                                      | GBVK4659-11, GBVK4660-11, GBVR2398-13, GBVR2420-13, GBVS1603-13, GBVS4535-13, GBVS4536-13, GBVW2980-13, GBVX1820-13, GBVX6360-15                                                                                                                                                                                                                                                                                                                                                                                                                                                                                                                                                                                                                                                                          |
| 94  | <i>Sorghum bicolor</i>          | NC_008602.1 | EF115542 | GBVD4728-11, GBVR2598-13, GBVX1836-13                                                                                                                                                                                                                                                                                                                                                                                                                                                                                                                                                                                                                                                                                                                                                                                                                                                                                                                                                                                                                                                                                                                                                                                                                                                                                                                                                                                                                                                                                                                                                                                                                                                                                                                                                                                                                                 | FSSM057-13, FSSM058-13, GBVD4729-11, GBVR2598-13, GBVX1836-13                                                                                                                                                                                                                                                                                                                                                                                                                                                                                                                                                                                                                                                                                                                                             |
|     | <i>Sorghum timorense</i>        | NC_023800.1 | KF998272 |                                                                                                                                                                                                                                                                                                                                                                                                                                                                                                                                                                                                                                                                                                                                                                                                                                                                                                                                                                                                                                                                                                                                                                                                                                                                                                                                                                                                                                                                                                                                                                                                                                                                                                                                                                                                                                                                       | GBVX2100-15                                                                                                                                                                                                                                                                                                                                                                                                                                                                                                                                                                                                                                                                                                                                                                                               |
| 95  | <i>Taiwania cryptomerioides</i> | NC_016065.1 | AP012266 | GBVL4447-11, GBVL4448-11, GBVL4449-11, GBVQ513-13, GBVQ1149-13, GBVQ1370-13, GBVQ4581-13                                                                                                                                                                                                                                                                                                                                                                                                                                                                                                                                                                                                                                                                                                                                                                                                                                                                                                                                                                                                                                                                                                                                                                                                                                                                                                                                                                                                                                                                                                                                                                                                                                                                                                                                                                              | GBVL4450-11, GBVQ513-13, GBVQ1409-13, GBVQ4581-13                                                                                                                                                                                                                                                                                                                                                                                                                                                                                                                                                                                                                                                                                                                                                         |
|     | <i>Taiwania flousiana</i>       | NC_021441.1 | KC427274 | GBVL4451-11, GBVQ4242-13, GBVQ4600-13                                                                                                                                                                                                                                                                                                                                                                                                                                                                                                                                                                                                                                                                                                                                                                                                                                                                                                                                                                                                                                                                                                                                                                                                                                                                                                                                                                                                                                                                                                                                                                                                                                                                                                                                                                                                                                 | GBVQ4242-13, GBVQ4600-13                                                                                                                                                                                                                                                                                                                                                                                                                                                                                                                                                                                                                                                                                                                                                                                  |
| 96  | <i>Trifolium repens</i>         | NC_024036.1 | KC894706 | GBVP048-11, GBVP053-11, GBVP054-11, GBVP055-11, GBVP056-11, GBVS1253-13, PLGE039-13, POWNA767-10, POWNA1728-12, VEMSH191-13, WABLK373-13                                                                                                                                                                                                                                                                                                                                                                                                                                                                                                                                                                                                                                                                                                                                                                                                                                                                                                                                                                                                                                                                                                                                                                                                                                                                                                                                                                                                                                                                                                                                                                                                                                                                                                                              | CSU029-10, GBVP047-11, GBVP049-11, GBVP050-11, GBVP051-11, GBVP052-11, GBVP057-11, VS1096-13, PLGE039-13, POWNA767-10, POWNA1728-12, POWNA1808-12, POWNA2583-12, RPLA001-15, VEMSH191-13, WABLK373-13                                                                                                                                                                                                                                                                                                                                                                                                                                                                                                                                                                                                     |
|     | <i>Trifolium subterraneum</i>   | NC_011828.1 | EU849487 | GBVP071-11, GBVP073-11, GBVR2771-13, GBVX1878-13                                                                                                                                                                                                                                                                                                                                                                                                                                                                                                                                                                                                                                                                                                                                                                                                                                                                                                                                                                                                                                                                                                                                                                                                                                                                                                                                                                                                                                                                                                                                                                                                                                                                                                                                                                                                                      | GBVP072-11, GBVR2771-13, GBVX1878-13, POWNA771-10, POWNA2759-12                                                                                                                                                                                                                                                                                                                                                                                                                                                                                                                                                                                                                                                                                                                                           |
| 97  | <i>Trillium maculatum</i>       | NC_027738.1 | KR780075 | GBVC3838-11, GBVP2756-14, GBVP5612-15                                                                                                                                                                                                                                                                                                                                                                                                                                                                                                                                                                                                                                                                                                                                                                                                                                                                                                                                                                                                                                                                                                                                                                                                                                                                                                                                                                                                                                                                                                                                                                                                                                                                                                                                                                                                                                 | GBVP5754-15                                                                                                                                                                                                                                                                                                                                                                                                                                                                                                                                                                                                                                                                                                                                                                                               |
|     | <i>Trillium tschonoskii</i>     | NC_027739.1 | KR780076 | GBVC3860-11, GBVT2726-13                                                                                                                                                                                                                                                                                                                                                                                                                                                                                                                                                                                                                                                                                                                                                                                                                                                                                                                                                                                                                                                                                                                                                                                                                                                                                                                                                                                                                                                                                                                                                                                                                                                                                                                                                                                                                                              | GBVT2816-13                                                                                                                                                                                                                                                                                                                                                                                                                                                                                                                                                                                                                                                                                                                                                                                               |
| 98  | <i>Triticum macha</i>           | NC_025955.1 | LC005978 | GBVD4883-11, GBVX7728-15, GBVX7900-15                                                                                                                                                                                                                                                                                                                                                                                                                                                                                                                                                                                                                                                                                                                                                                                                                                                                                                                                                                                                                                                                                                                                                                                                                                                                                                                                                                                                                                                                                                                                                                                                                                                                                                                                                                                                                                 | GBVX7728-15, GBVX4851-15                                                                                                                                                                                                                                                                                                                                                                                                                                                                                                                                                                                                                                                                                                                                                                                  |
|     | <i>Triticum timopheevii</i>     | NC_024764.1 | KJ614410 | GBVD4908-11, GBVD4909-11, GBVD4910-11, GBVD4911-11, GBVX4851-15, GBVX6333-15, GBVX6334-15, GBVX6335-15, GBVX6336-15, GBVX7858-15                                                                                                                                                                                                                                                                                                                                                                                                                                                                                                                                                                                                                                                                                                                                                                                                                                                                                                                                                                                                                                                                                                                                                                                                                                                                                                                                                                                                                                                                                                                                                                                                                                                                                                                                      | GBVX4851-15, GBVX6333-15, GBVX6334-15, GBVX6335-15, GBVX6336-15, GBVX7795-15, GBVX7796-15, GBVX7858-15                                                                                                                                                                                                                                                                                                                                                                                                                                                                                                                                                                                                                                                                                                    |
| 99  | <i>Utricularia gibba</i>        | NC_021449.1 | KC997777 | GBVX1387-13                                                                                                                                                                                                                                                                                                                                                                                                                                                                                                                                                                                                                                                                                                                                                                                                                                                                                                                                                                                                                                                                                                                                                                                                                                                                                                                                                                                                                                                                                                                                                                                                                                                                                                                                                                                                                                                           | GBVK2243-11, GBVX1387-13                                                                                                                                                                                                                                                                                                                                                                                                                                                                                                                                                                                                                                                                                                                                                                                  |
|     | <i>Utricularia macrorhiza</i>   | NC_025653.1 | HG803177 | GBVK2251-11                                                                                                                                                                                                                                                                                                                                                                                                                                                                                                                                                                                                                                                                                                                                                                                                                                                                                                                                                                                                                                                                                                                                                                                                                                                                                                                                                                                                                                                                                                                                                                                                                                                                                                                                                                                                                                                           | GBVX4856-15, GBVX7888-15                                                                                                                                                                                                                                                                                                                                                                                                                                                                                                                                                                                                                                                                                                                                                                                  |
| 100 | <i>Vigna angularis</i>          | NC_021091.1 | AP012598 | GBVP1134-11, GBVP1135-11, GBVP1136-11, GBVP1137-11, GBVP1138-11, GBVP1139-11, GBVP1140-11, GBVR1904-13, GBVX1994-13                                                                                                                                                                                                                                                                                                                                                                                                                                                                                                                                                                                                                                                                                                                                                                                                                                                                                                                                                                                                                                                                                                                                                                                                                                                                                                                                                                                                                                                                                                                                                                                                                                                                                                                                                   | GBVP2095-14, GBVP2096-14, GBVP2097-14, GBVP2098-14, GBVP2099-14, GBVP2100-14, GBVR1904-13, GBVX1994-13                                                                                                                                                                                                                                                                                                                                                                                                                                                                                                                                                                                                                                                                                                    |
|     | <i>Vigna unguiculata</i>        | NC_018051.1 | JQ755301 | GBVP1193-11, GBVP1194-11, GBVP1195-11, GBVP1197-11, GBVP1198-11, GBVP1199-11, GBVP1200-11, GBVP1201-11, GBVP1202-11, GBVP1209-11, GBVP1210-11, GBVP1212-11, GBVT3682-13, GBVU3119-13, GBVX1954-13                                                                                                                                                                                                                                                                                                                                                                                                                                                                                                                                                                                                                                                                                                                                                                                                                                                                                                                                                                                                                                                                                                                                                                                                                                                                                                                                                                                                                                                                                                                                                                                                                                                                     | GBVP1196-11, GBVP1204-11, GBVP1205-11, GBVP1206-11, GBVP1207-11, GBVP1208-11, GBVP1211-11, GBVT3682-13, GBVU3119-13, GBVX1954-13                                                                                                                                                                                                                                                                                                                                                                                                                                                                                                                                                                                                                                                                          |
| 101 | <i>Vitis rotundifolia</i>       | NC_023790.1 | KF976463 |                                                                                                                                                                                                                                                                                                                                                                                                                                                                                                                                                                                                                                                                                                                                                                                                                                                                                                                                                                                                                                                                                                                                                                                                                                                                                                                                                                                                                                                                                                                                                                                                                                                                                                                                                                                                                                                                       | CSU014-10, GBVJ1333-11, GBVJ1334-11                                                                                                                                                                                                                                                                                                                                                                                                                                                                                                                                                                                                                                                                                                                                                                       |
|     | <i>Vitis vinifera</i>           | NC_007957.1 | DQ424856 | GBVJ1335-11, GBVR2422-13, GBVS1444-13, GBVT1406, GBVX1818-13                                                                                                                                                                                                                                                                                                                                                                                                                                                                                                                                                                                                                                                                                                                                                                                                                                                                                                                                                                                                                                                                                                                                                                                                                                                                                                                                                                                                                                                                                                                                                                                                                                                                                                                                                                                                          | GBVJ1336-11, GBVR2422-13, GBVS4411-13, GBVS1117-13, GBVT1473-13, GBVW1481-13, GBVX1818-13, GBVX1879-13, HIDNA046-14                                                                                                                                                                                                                                                                                                                                                                                                                                                                                                                                                                                                                                                                                       |

**Supplementary Table S3. Records used to compile the Comprehensive Reference Barcode database.**

List of 735 species for which sequence data of *matK* and *rbcL* were downloaded from complete chloroplast genomes from NCBI forming the basis of the artificial Comprehensive Reference Barcode (CRB) database.

| Species                            | Accession numbers |          |
|------------------------------------|-------------------|----------|
| <i>Abies koreana</i>               | NC_026892.1       | KP742350 |
| <i>Acacia ligulata</i>             | NC_026134.1       | LN555649 |
| <i>Acidosasa purpurea</i>          | NC_015820.1       | HQ337793 |
| <i>Acorus americanus</i>           | NC_010093.1       | EU273602 |
| <i>Acorus calamus</i>              | NC_007407.1       | AJ879453 |
| <i>Acorus gramineus</i>            | NC_026299.1       | KP099646 |
| <i>Actinidia chinensis</i>         | NC_026690.1       | KP297242 |
| <i>Actinidia deliciosa</i>         | NC_026691.1       | KP297244 |
| <i>Adenophora remotiflora</i>      | NC_026999.1       | KP889213 |
| <i>Adiantum capillus-veneris</i>   | NC_004766.1       | AY178864 |
| <i>Aegilops bicornis</i>           | NC_024831.1       | KJ614418 |
| <i>Aegilops cylindrica</i>         | NC_023096.1       | KF534489 |
| <i>Aegilops geniculata</i>         | NC_023097.1       | KF534490 |
| <i>Aegilops kotschyi</i>           | NC_024832.1       | KJ614420 |
| <i>Aegilops longissima</i>         | NC_024830.1       | KJ614416 |
| <i>Aegilops searsii</i>            | NC_024815.1       | KJ614414 |
| <i>Aegilops sharonensis</i>        | NC_024816.1       | KJ614419 |
| <i>Aegilops speltoides</i>         | NC_022135.1       | JQ740834 |
| <i>Aegilops tauschii</i>           | NC_022133.1       | JQ754651 |
| <i>Aethionema cordifolium</i>      | NC_009265.1       | AP009366 |
| <i>Aethionema grandiflorum</i>     | NC_009266.1       | AP009367 |
| <i>Agathis dammara</i>             | NC_023119.1       | AB830884 |
| <i>Ageratina adenophora</i>        | NC_015621.1       | JF826503 |
| <i>Agrostemma githago</i>          | NC_023357.1       | KF527884 |
| <i>Agrostis stolonifera</i>        | NC_008591.1       | EF115543 |
| <i>Ajuga reptans</i>               | NC_023102.1       | KF709391 |
| <i>Allium cepa</i>                 | NC_024813.1       | KF728080 |
| <i>Allosyncarpia ternata</i>       | NC_022413.1       | KC180806 |
| <i>Alsophila spinulosa</i>         | NC_012818.1       | FJ556581 |
| <i>Amborella trichopoda</i>        | NC_005086.1       | AJ506156 |
| <i>Amentotaxus argotaenia</i>      | NC_027581.1       | KR780582 |
| <i>Amentotaxus formosana</i>       | NC_024945.1       | AP014574 |
| <i>Ammophila breviligulata</i>     | NC_027465.1       | KM974730 |
| <i>Ampelocalamus calcareus</i>     | NC_024731.1       | KJ496369 |
| <i>Ampelodesmos mauritanicus</i>   | NC_027466.1       | KM974731 |
| <i>Ananas comosus</i>              | NC_026220.1       | AP014632 |
| <i>Andrographis paniculata</i>     | NC_022451.2       | KF150644 |
| <i>Aneura mirabilis</i>            | NC_010359.1       | EU043314 |
| <i>Angiopteris angustifolia</i>    | NC_026300.1       | KP099647 |
| <i>Angiopteris evecta</i>          | NC_008829.1       | DQ821119 |
| <i>Angophora costata</i>           | NC_022412.1       | KC180805 |
| <i>Angophora floribunda</i>        | NC_022411.1       | KC180804 |
| <i>Anomochloa marantoidea</i>      | NC_014062.1       | GQ329703 |
| <i>Anthoceros angustus</i>         | NC_004543.1       | AB086179 |
| <i>Anthoxanthum nitens</i>         | NC_027475.1       | KM974740 |
| <i>Anthoxanthum odoratum</i>       | NC_027467.1       | KM974732 |
| <i>Anthriscus cerefolium</i>       | NC_015113.1       | GU456628 |
| <i>Apios americana</i>             | NC_025909.1       | -        |
| <i>Arabidopsis thaliana</i>        | NC_000932.1       | AP000423 |
| <i>Arabis alpina</i>               | NC_023367.1       | HF934132 |
| <i>Arabis hirsuta JO23</i>         | NC_009268.1       | AP009369 |
| <i>Arachis hypogaea</i>            | NC_026676.1       | -        |
| <i>Aralia undulata</i>             | NC_022810.1       | KC456163 |
| <i>Araucaria heterophylla</i>      | NC_026450.1       | KM067155 |
| <i>Ardisia polysticta</i>          | NC_021121.1       | KC465962 |
| <i>Aristida purpurea</i>           | NC_025228.1       | KJ920224 |
| <i>Artemisia frigida</i>           | NC_020607.1       | JX293720 |
| <i>Artemisia montana</i>           | NC_025910.1       | KF887960 |
| <i>Arundinaria appalachiana</i>    | NC_023934.1       | KC817462 |
| <i>Arundinaria fargesii</i>        | NC_024712.1       | JX513413 |
| <i>Arundinaria gigantea</i>        | NC_020341.1       | JX235347 |
| <i>Arundinaria tecta</i>           | NC_023935.1       | KC817463 |
| <i>Asclepias nivea</i>             | NC_022431.1       | KF539844 |
| <i>Asclepias syriaca</i>           | NC_022432.1       | KF386166 |
| <i>Aster spathulifolius</i>        | NC_027434.1       | KF279514 |
| <i>Atropa belladonna Ab5p(kan)</i> | NC_004561.1       | AJ316582 |
| <i>Avena sativa</i>                | NC_027468.1       | KM974733 |
| <i>Azadirachta indica</i>          | NC_023792.1       | KF986530 |
| <i>Bambusa arnhemica</i>           | NC_026958.1       | KJ870989 |
| <i>Bambusa bambos</i>              | NC_026957.1       | KJ870988 |
| <i>Bambusa emeiensis</i>           | NC_015830.1       | HQ337797 |
| <i>Bambusa multiplex</i>           | NC_024668.1       | KJ722536 |
| <i>Bambusa oldhamii</i>            | NC_012927.1       | FJ970915 |

|                                          |             |          |
|------------------------------------------|-------------|----------|
| <i>Barbarea verna</i>                    | NC_009269.1 | AP009370 |
| <i>Berberis bealei</i>                   | NC_022457.1 | KF176554 |
| <i>Bismarckia nobilis</i>                | NC_020366.1 | JX088664 |
| <i>Boea hygrometrica</i>                 | NC_016468.1 | JN107811 |
| <i>Bomarea edulis</i>                    | NC_025306.1 | KM233641 |
| <i>Bowenia serrulata</i>                 | NC_026036.1 | JX402774 |
| <i>Brachyelytrum aristosum</i>           | NC_027470.1 | KM974735 |
| <i>Brachypodium distachyon</i>           | NC_011032.1 | EU325680 |
| <i>Brassaiopsis hainla</i>               | NC_022811.1 | KC456164 |
| <i>Brassica napus ZY036</i>              | NC_016734.1 | GQ861354 |
| <i>Brassica rapa</i>                     | NC_015139.1 | DQ231548 |
| <i>Briza maxima</i>                      | NC_027471.1 | KM974736 |
| <i>Bromus vulgaris</i>                   | NC_027472.1 | KM974737 |
| <i>Buergersiochloa bambusoides</i>       | NC_026968.1 | KJ871000 |
| <i>Buxus microphylla</i>                 | NC_009599.1 | EF380351 |
| <i>Calamus caryotoides</i>               | NC_020365.1 | JX088663 |
| <i>Calanthe triplicata</i>               | NC_024544.1 | KF753635 |
| <i>Callitropsis nootkatensis</i>         | NC_026295.1 | KP099642 |
| <i>Callitropsis vietnamensis</i>         | NC_026298.1 | KP099645 |
| <i>Calocedrus formosana</i>              | NC_023121.1 | AB831010 |
| <i>Calycanthus floridus var. glaucus</i> | NC_004993.1 | AJ428413 |
| <i>Camellia crapnelliana</i>             | NC_024541.1 | KF753632 |
| <i>Camellia cuspidata</i>                | NC_022459.1 | KF156833 |
| <i>Camellia danzaiensis</i>              | NC_022460.1 | KF156834 |
| <i>Camellia grandibracteata</i>          | NC_024659.1 | KJ806274 |
| <i>Camellia impressinervis</i>           | NC_022461.1 | KF156835 |
| <i>Camellia leptophylla</i>              | NC_024660.1 | KJ806275 |
| <i>Camellia oleifera</i>                 | NC_023084.1 | JQ975031 |
| <i>Camellia petelotii</i>                | NC_024661.1 | KJ806276 |
| <i>Camellia pitaridii</i>                | NC_022462.1 | KF156837 |
| <i>Camellia pubicosta</i>                | NC_024662.1 | KJ806277 |
| <i>Camellia reticulata</i>               | NC_024663.1 | KJ806278 |
| <i>Camellia sinensis</i>                 | NC_020019.1 | KC143082 |
| <i>Camellia taliensis</i>                | NC_022264.1 | KF156839 |
| <i>Camellia yunnanensis</i>              | NC_022463.1 | KF156838 |
| <i>Campanula takesimana</i>              | NC_026203.1 | KP006497 |
| <i>Campynema lineare</i>                 | NC_026785.1 | KP462881 |
| <i>Cannabis sativa</i>                   | NC_026562.1 | KP274871 |
| <i>Cannabis sativa</i>                   | NC_027223.1 | KR363961 |
| <i>Capsella bursa-pastoris JO22</i>      | NC_009270.1 | AP009371 |
| <i>Capsella rubella</i>                  | NC_027693.1 | KR029093 |
| <i>Capsicum annuum</i>                   | NC_018552.1 | JX270811 |
| <i>Capsicum lycianthoides</i>            | NC_026551.1 | KP274856 |
| <i>Cardamine impatiens</i>               | NC_026445.1 | KJ136821 |
| <i>Cardamine resedifolia</i>             | NC_026446.1 | KJ136822 |
| <i>Carex siderosticta</i>                | NC_027250.1 | KP751906 |
| <i>Carica papaya</i>                     | NC_010323.1 | EU431223 |
| <i>Carludovica palmata</i>               | NC_026786.1 | KP462882 |
| <i>Carnegiea gigantea</i>                | NC_027618.1 | KT164771 |
| <i>Castanea mollissima</i>               | NC_014674.1 | HQ336406 |
| <i>Castanopsis echinocarpa</i>           | NC_023801.1 | KJ001129 |
| <i>Catharanthus roseus</i>               | NC_021423.1 | KC561139 |
| <i>Cathaya argyrophylla</i>              | NC_014589.1 | AB547400 |
| <i>Cattleya crispata</i>                 | NC_026568.1 | KP168671 |
| <i>Cedrus deodara</i>                    | NC_014575.1 | AB480043 |
| <i>Cenchrus americanus</i>               | NC_024171.1 | KJ490012 |
| <i>Centaurea diffusa</i>                 | NC_024286.1 | KJ690264 |
| <i>Centotheca lappacea</i>               | NC_025229.1 | KJ920225 |
| <i>Cephalotaxus oliveri</i>              | NC_021110.1 | KC136217 |
| <i>Cephalotaxus wilsoniana</i>           | NC_016063.1 | AP012265 |
| <i>Cerantonia siliqua</i>                | NC_026678.1 | -        |
| <i>Ceratophyllum demersum</i>            | NC_009962.1 | EF614270 |
| <i>Ceratozamia hildae</i>                | NC_026037.1 | JX407108 |
| <i>Chikusichloa aquatica</i>             | NC_027184.1 | KR078265 |
| <i>Chimonocalamus longiusculus</i>       | NC_024714.1 | JX513415 |
| <i>Chionochloa macra</i>                 | NC_025230.1 | KJ920227 |
| <i>Chloranthus japonicus</i>             | NC_026565.1 | KP256024 |
| <i>Chloranthus spicatus</i>              | NC_009598.1 | EF380352 |
| <i>Chrysanthemum indicum</i>             | NC_020320.1 | JN867589 |
| <i>Chrysanthemum x morifolium</i>        | NC_020092.1 | JQ362483 |
| <i>Chrysobalanus icaco</i>               | NC_024061.1 | KJ414480 |
| <i>Chusquea circinata</i>                | NC_027490.1 | KP319241 |
| <i>Chusquea liebmanna</i>                | NC_026969.1 | KJ871001 |
| <i>Chusquea spectabilis</i>              | NC_026959.1 | KJ870990 |
| <i>Cicer arietinum</i>                   | NC_011163.1 | EU835853 |
| <i>Cistanche deserticola</i>             | NC_021111.1 | KC128846 |
| <i>Cistanche phelypaea</i>               | NC_025642.1 | HG515538 |
| <i>Citrus aurantiifolia</i>              | NC_024929.1 | KJ865401 |
| <i>Citrus sinensis</i>                   | NC_008334.1 | DQ864733 |
| <i>Cocos nucifera</i>                    | NC_022417.1 | KF285453 |
| <i>Coffea arabica</i>                    | NC_008535.1 | EF044213 |



|                                    |             |          |
|------------------------------------|-------------|----------|
| <i>Coix lacryma-jobi</i>           | NC_013273.1 | FJ261955 |
| <i>Coleataenia prionitis</i>       | NC_025231.1 | KJ920228 |
| <i>Colocasia esculenta</i>         | NC_016753.1 | JN105689 |
| <i>Corallorhiza bulbosa</i>        | NC_025659.1 | KM390013 |
| <i>Corallorhiza macrantha</i>      | NC_025660.1 | KM390017 |
| <i>Corallorhiza mertensiana</i>    | NC_025661.1 | KM390018 |
| <i>Corallorhiza odontorhiza</i>    | NC_025664.1 | KM390021 |
| <i>Corallorhiza trifida</i>        | NC_025662.1 | KM390019 |
| <i>Corallorhiza wisteriana</i>     | NC_025663.1 | KM390020 |
| <i>Corymbia eximia</i>             | NC_022409.1 | KC180802 |
| <i>Corymbia gummifera</i>          | NC_022407.1 | KC180800 |
| <i>Corymbia maculata</i>           | NC_022408.1 | KC180801 |
| <i>Corymbia tessellaris</i>        | NC_022410.1 | KC180803 |
| <i>Corynocarpus laevigata</i>      | NC_014807.1 | HQ207704 |
| <i>Couepia guianensis</i>          | NC_024063.1 | KJ414482 |
| <i>Crucihimalaya wallichii JS5</i> | NC_009271.1 | AP009372 |
| <i>Cryptomeria japonica</i>        | NC_010548.1 | AP009377 |
| <i>Cucumis hystrix</i>             | NC_023544.1 | KF957866 |
| <i>Cucumis melo</i>                | NC_015983.1 | JF412791 |
| <i>Cucumis sativus</i>             | NC_007144.1 | AJ970307 |
| <i>Cunninghamia lanceolata</i>     | NC_021437.1 | KC427270 |
| <i>Cupressus sempervirens</i>      | NC_026296.1 | KP099643 |
| <i>Curcuma roscoeana</i>           | NC_022928.1 | KF601574 |
| <i>Cuscuta exaltata</i>            | NC_009963.1 | EU189132 |
| <i>Cuscuta reflexa</i>             | NC_009766.1 | AM711640 |
| <i>Cycas revoluta</i>              | NC_020319.1 | JN867588 |
| <i>Cycas taitungensis</i>          | NC_009618.1 | AP009339 |
| <i>Cymbidium aloifolium</i>        | NC_021429.1 | KC876122 |
| <i>Cymbidium faberi</i>            | NC_027743.1 | KR919606 |
| <i>Cymbidium mannii</i>            | NC_021433.1 | KC876129 |
| <i>Cymbidium sinense</i>           | NC_021430.1 | KC876123 |
| <i>Cymbidium tortisepalum</i>      | NC_021431.1 | KC876124 |
| <i>Cymbidium tracyanum</i>         | NC_021432.1 | KC876127 |
| <i>Cynara humilis</i>              | NC_027113.1 | KP299292 |
| <i>Cypripedium formosanum</i>      | NC_026772.1 | KJ501998 |
| <i>Cypripedium japonicum</i>       | NC_027227.1 | KJ625630 |
| <i>Cypripedium macranthos</i>      | NC_024421.1 | KF925434 |
| <i>Dactylis glomerata</i>          | NC_027473.1 | KM974738 |
| <i>Danthonia californica</i>       | NC_025232.1 | KJ920229 |
| <i>Dasypogon bromeliifolius</i>    | NC_020367.1 | JX088665 |
| <i>Datura stramonium</i>           | NC_018117.1 | JN654342 |
| <i>Daucus carota</i>               | NC_008325.1 | DQ898156 |
| <i>Dendrobium catenatum</i>        | NC_024019.1 | KC771275 |
| <i>Dendrobium strongylanthum</i>   | NC_027691.1 | KR673323 |
| <i>Dendrocalamus latiflorus</i>    | NC_013088.1 | FJ970916 |
| <i>Dendropanax dentiger</i>        | NC_026546.1 | KP271241 |
| <i>Dendropanax morbifer</i>        | NC_027607.1 | KR136270 |
| <i>Diandrolyra sp. Clark 1301</i>  | NC_026960.1 | KJ870991 |
| <i>Diarrhena obovata</i>           | NC_027474.1 | KM974739 |
| <i>Dieffenbachia seguine</i>       | NC_027272.1 | KR262889 |
| <i>Digitaria exilis</i>            | NC_024176.1 | KJ513091 |
| <i>Dioon spinulosum</i>            | NC_027512.1 | LC049070 |
| <i>Dioscorea elephantipes</i>      | NC_009601.1 | EF380353 |
| <i>Dioscorea rotundata</i>         | NC_024170.1 | KJ490011 |
| <i>Dioscorea zingiberensis</i>     | NC_027090.1 | KP899622 |
| <i>Diplopterygium glaucum</i>      | NC_024158.1 | KF225594 |
| <i>Draba nemorosa JO21</i>         | NC_009272.1 | AP009373 |
| <i>Drimys granadensis</i>          | NC_008456.1 | DQ887676 |
| <i>Dunalia brachyacantha</i>       | NC_026906.1 | KP308151 |
| <i>Dunalia obovata</i>             | NC_026563.1 | KP280057 |
| <i>Dunalia solanacea</i>           | NC_027099.1 | KP998157 |
| <i>Echinochloa oryzicola STB03</i> | NC_024643.2 | KJ000048 |
| <i>Echites umbellatus</i>          | NC_025655.1 | KJ953904 |
| <i>Elaeis guineensis</i>           | NC_017602.1 | JF274081 |
| <i>Eleutherococcus senticosus</i>  | NC_016430.1 | JN637765 |
| <i>Elleanthus sodiroi</i>          | NC_027266.1 | KR260986 |
| <i>Elodea canadensis</i>           | NC_018541.1 | JQ310743 |
| <i>Elytrophorus spicatus</i>       | NC_025233.1 | KJ920230 |
| <i>Encephalartos lehmannii</i>     | NC_027514.1 | LC049336 |
| <i>Ephedra equisetina</i>          | NC_011954.1 | AP010819 |
| <i>Equisetum arvense</i>           | NC_014699.1 | GU191334 |
| <i>Equisetum hyemale</i>           | NC_020146.1 | KC117177 |
| <i>Eriachne stipacea</i>           | NC_025234.1 | KJ920231 |
| <i>Erodium absinthoides</i>        | NC_026847.1 | KJ523886 |
| <i>Erodium carvifolium</i>         | NC_015083.1 | HQ713469 |
| <i>Erodium chrysanthum</i>         | NC_027065.1 | KJ701602 |
| <i>Erodium crassifolium</i>        | NC_025906.1 | KF977221 |
| <i>Erodium gruinum</i>             | NC_025907.1 | KF804069 |
| <i>Erodium texanum</i>             | NC_014569.1 | HM125536 |
| <i>Erodium trifolium</i>           | NC_024635.1 | KF441758 |
| <i>Erycina pusilla</i>             | NC_018114.1 | JF746994 |

|                                               |             |          |
|-----------------------------------------------|-------------|----------|
| <i>Eucalyptus aromaphloia</i>                 | NC_022396.1 | KC180789 |
| <i>Eucalyptus baxteri</i>                     | NC_022382.1 | KC180773 |
| <i>Eucalyptus camaldulensis</i>               | NC_022398.1 | KC180791 |
| <i>Eucalyptus cladocalyx</i>                  | NC_022394.1 | KC180786 |
| <i>Eucalyptus cloeziana</i>                   | NC_022388.1 | KC180779 |
| <i>Eucalyptus curtisii</i>                    | NC_022391.1 | KC180782 |
| <i>Eucalyptus deglupta</i>                    | NC_022399.1 | KC180792 |
| <i>Eucalyptus delegatensis</i>                | NC_022380.1 | KC180771 |
| <i>Eucalyptus diversicolor</i>                | NC_022402.1 | KC180795 |
| <i>Eucalyptus diversifolia</i>                | NC_022383.1 | KC180774 |
| <i>Eucalyptus elata</i>                       | NC_022385.1 | KC180776 |
| <i>Eucalyptus erythrocorys</i>                | NC_022406.1 | KC180799 |
| <i>Eucalyptus globulus subsp. globulus</i>    | NC_008115.1 | AY780259 |
| <i>Eucalyptus grandis</i>                     | NC_014570.1 | HM347959 |
| <i>Eucalyptus guilfoylei</i>                  | NC_022405.1 | KC180798 |
| <i>Eucalyptus marginata</i>                   | NC_022390.1 | KC180781 |
| <i>Eucalyptus melliodora</i>                  | NC_022392.1 | KC180784 |
| <i>Eucalyptus microcorys</i>                  | NC_022404.1 | KC180797 |
| <i>Eucalyptus nitens</i>                      | NC_022395.1 | KC180788 |
| <i>Eucalyptus obliqua</i>                     | NC_022378.1 | KC180769 |
| <i>Eucalyptus patens</i>                      | NC_022389.1 | KC180780 |
| <i>Eucalyptus polybractea</i>                 | NC_022393.1 | KC180785 |
| <i>Eucalyptus radiata</i>                     | NC_022379.1 | KC180770 |
| <i>Eucalyptus regnans</i>                     | NC_022386.1 | KC180777 |
| <i>Eucalyptus saligna</i>                     | NC_022397.1 | KC180790 |
| <i>Eucalyptus salmonophloia</i>               | NC_022403.1 | KC180796 |
| <i>Eucalyptus sieberi</i>                     | NC_022384.1 | KC180775 |
| <i>Eucalyptus spathulata</i>                  | NC_022400.1 | KC180793 |
| <i>Eucalyptus torquata</i>                    | NC_022401.1 | KC180794 |
| <i>Eucalyptus umbra</i>                       | NC_022387.1 | KC180778 |
| <i>Eucalyptus verrucata</i>                   | NC_022381.1 | KC180772 |
| <i>Eugenia uniflora</i>                       | NC_027744.1 | KR867678 |
| <i>Eustrephus latifolius</i>                  | NC_025305.1 | KM233639 |
| <i>Fagopyrum esculentum subsp. ancestrale</i> | NC_010776.1 | EU254477 |
| <i>Fagopyrum tataricum Daegwan3-3</i>         | NC_027161.1 | KM201427 |
| <i>Fargesia nitida</i>                        | NC_024715.1 | JX513416 |
| <i>Fargesia spathacea</i>                     | NC_024716.1 | JX513417 |
| <i>Fargesia yunnanensis</i>                   | NC_024717.1 | JX513418 |
| <i>Fatsia japonica</i>                        | NC_027685.1 | KR021045 |
| <i>Ferocalamus rimosivaginus</i>              | NC_015831.1 | HQ337794 |
| <i>Festuca altissima</i>                      | NC_019648.1 | JX871939 |
| <i>Festuca arundinacea</i>                    | NC_011713.2 | FJ466687 |
| <i>Festuca ovina</i>                          | NC_019649.1 | JX871940 |
| <i>Festuca pratensis</i>                      | NC_019650.1 | JX871941 |
| <i>Fragaria chiloensis</i>                    | NC_019601.1 | JN884816 |
| <i>Fragaria iinumae</i>                       | NC_024258.1 | KC507759 |
| <i>Fragaria mandshurica</i>                   | NC_018767.1 | JQ396172 |
| <i>Fragaria vesca subsp. bracteata</i>        | NC_018766.1 | JQ396171 |
| <i>Fragaria vesca subsp. vesca</i>            | NC_015206.1 | JF345175 |
| <i>Fragaria virginiana</i>                    | NC_019602.1 | JN884817 |
| <i>Francoa sonchifolia</i>                    | NC_021101.1 | JQ809470 |
| <i>Fritillaria cirrhosa</i>                   | NC_024728.1 | KF769143 |
| <i>Fritillaria hupehensis</i>                 | NC_024736.1 | KF712486 |
| <i>Fritillaria taipaiensis</i>                | NC_023247.1 | KC543997 |
| <i>Gaoligongshania megalothyrsa</i>           | NC_024718.1 | JX513419 |
| <i>Gelidocalamus tessellatus</i>              | NC_024719.1 | JX513420 |
| <i>Gentiana crassicaulis</i>                  | NC_027442.1 | KJ676538 |
| <i>Gentiana straminea</i>                     | NC_027441.1 | KJ657732 |
| <i>Geranium palmatum</i>                      | NC_014573.1 | HM125537 |
| <i>Ginkgo biloba</i>                          | NC_016986.1 | JN867585 |
| <i>Glycine canescens</i>                      | NC_021647.1 | KC893635 |
| <i>Glycine cyrtoloba</i>                      | NC_021645.1 | KC893632 |
| <i>Glycine dolichocarpa</i>                   | NC_021648.1 | KC893636 |
| <i>Glycine falcata</i>                        | NC_021649.1 | KC893637 |
| <i>Glycine max</i>                            | NC_007942.1 | DQ317523 |
| <i>Glycine soja</i>                           | NC_022868.1 | KF611800 |
| <i>Glycine stenophita</i>                     | NC_021646.1 | KC893634 |
| <i>Glycine syndetika</i>                      | NC_021650.1 | KC893638 |
| <i>Glycine tomentella</i>                     | NC_021636.1 | KC893633 |
| <i>Glycyrrhiza glabra</i>                     | NC_024038.1 | KF201590 |
| <i>Gnetum gnemon</i>                          | NC_026301.1 | KP099649 |
| <i>Gnetum montanum</i>                        | NC_021438.1 | KC427271 |
| <i>Gnetum parvifolium</i>                     | NC_011942.1 | AP009569 |
| <i>Goodyera fumata</i>                        | NC_026773.1 | KJ501999 |
| <i>Gossypium anomalum</i>                     | NC_023213.1 | JF317351 |
| <i>Gossypium arboreum</i>                     | NC_016712.1 | HQ325740 |
| <i>Gossypium areysianum</i>                   | NC_018112.1 | JN019795 |
| <i>Gossypium bickii</i>                       | NC_023214.1 | JF317352 |
| <i>Gossypium capitata-viridis</i>             | NC_018111.1 | JN019794 |
| <i>Gossypium darwinii</i>                     | NC_016670.1 | HQ325741 |
| <i>Gossypium gossypoides</i>                  | NC_017894.1 | HQ901195 |

|                                             |             |          |
|---------------------------------------------|-------------|----------|
| <i>Gossypium herbaceum</i>                  | NC_023215.1 | JF317353 |
| <i>Gossypium herbaceum subsp. africanum</i> | NC_016692.1 | HQ325742 |
| <i>Gossypium hirsutum</i>                   | NC_007944.1 | DQ345959 |
| <i>Gossypium incanum</i>                    | NC_018109.1 | JN019792 |
| <i>Gossypium longicalyx</i>                 | NC_023216.1 | JF317354 |
| <i>Gossypium mustelinum</i>                 | NC_016711.1 | HQ325743 |
| <i>Gossypium raimondii</i>                  | NC_016668.1 | HQ325744 |
| <i>Gossypium robinsonii</i>                 | NC_018113.1 | JN019791 |
| <i>Gossypium somalense</i>                  | NC_018110.1 | JN019793 |
| <i>Gossypium stocksii</i>                   | NC_023217.1 | JF317355 |
| <i>Gossypium sturtianum</i>                 | NC_023218.1 | JF317356 |
| <i>Gossypium thurberi</i>                   | NC_015204.1 | GU907100 |
| <i>Gossypium tomentosum</i>                 | NC_016690.1 | HQ325745 |
| <i>Gossypium turneri</i>                    | NC_026835.1 | JQ742090 |
| <i>Greslania sp. McPherson 19217</i>        | NC_026961.1 | KJ870993 |
| <i>Guadua weberbaueri</i>                   | NC_026991.1 | KP793062 |
| <i>Guizotia abyssinica</i>                  | NC_010601.1 | EU549769 |
| <i>Habenaria pantlingiana</i>               | NC_026775.1 | KJ524104 |
| <i>Haematoxylum brasiletto</i>              | NC_026679.1 | -        |
| <i>Hakonechloa macra</i>                    | NC_025235.1 | KJ920232 |
| <i>Haloxylon ammodendron</i>                | NC_027668.1 | KF534478 |
| <i>Haloxylon persicum</i>                   | NC_027669.1 | KF534479 |
| <i>Hanabusaya asiatica</i>                  | NC_024732.1 | KJ477692 |
| <i>Helianthus annuus</i>                    | NC_007977.1 | DQ383815 |
| <i>Helianthus decapetalus</i>               | NC_023110.1 | KF746356 |
| <i>Helianthus divaricatus</i>               | NC_023109.1 | KF746352 |
| <i>Helianthus giganteus</i>                 | NC_023107.1 | KF746346 |
| <i>Helianthus grosseserratus</i>            | NC_023108.1 | KF746350 |
| <i>Helianthus hirsutus</i>                  | NC_023111.1 | KF746359 |
| <i>Helianthus maximiliani</i>               | NC_023114.1 | KF746380 |
| <i>Helianthus strumosus</i>                 | NC_023113.1 | KF746376 |
| <i>Helianthus tuberosus</i>                 | NC_023112.1 | KF746361 |
| <i>Heliconia collinsiana</i>                | NC_020362.1 | JX088660 |
| <i>Helictochloa hookeri</i>                 | NC_027469.1 | KM974734 |
| <i>Heloniopsis tubiflora</i>                | NC_027159.1 | KM078036 |
| <i>Hesperelaea palmeri</i>                  | NC_025787.1 | LN515489 |
| <i>Hesperocyparis glabra</i>                | NC_026297.1 | KP099644 |
| <i>Hevea brasiliensis</i>                   | NC_015308.1 | HQ285842 |
| <i>Hibiscus syriacus</i>                    | NC_026909.1 | KP688069 |
| <i>Hickelia madagascariensis</i>            | NC_026962.1 | KJ870994 |
| <i>Hirtella physophora</i>                  | NC_024066.1 | KJ414485 |
| <i>Hirtella racemosa</i>                    | NC_024060.1 | KJ414479 |
| <i>Hordeum jubatum</i>                      | NC_027476.1 | KM974741 |
| <i>Hordeum vulgare subsp. vulgare</i>       | NC_008590.1 | EF115541 |
| <i>Huperzia lucidula</i>                    | NC_006861.1 | AY660566 |
| <i>Hypseocharis bilobata</i>                | NC_023260.1 | KF240616 |
| <i>Illicium oliganthum</i>                  | NC_009600.1 | EF380354 |
| <i>Indigofera tinctoria</i>                 | NC_026680.1 | -        |
| <i>Indocalamus longiauritus</i>             | NC_015803.1 | HQ337795 |
| <i>Indocalamus wilsonii</i>                 | NC_024720.1 | JX513421 |
| <i>Indosasa sinica</i>                      | NC_024721.1 | JX513422 |
| <i>lochroma loxense</i>                     | NC_026726.1 | KP296185 |
| <i>lochroma nitidum</i>                     | NC_026567.1 | KP294386 |
| <i>lochroma stenanthum</i>                  | NC_026574.1 | KP262399 |
| <i>lochroma tingoanum</i>                   | NC_027177.1 | KP280175 |
| <i>Ipomoea batatas</i>                      | NC_026703.1 | KP212149 |
| <i>Ipomoea purpurea</i>                     | NC_009808.1 | EU118126 |
| <i>Iris gatesii</i>                         | NC_024936.1 | KM014691 |
| <i>Isachne distichophylla</i>               | NC_025236.1 | KJ920233 |
| <i>Isoetes flaccida</i>                     | NC_014675.1 | GU191333 |
| <i>Jacobaea vulgaris</i>                    | NC_015543.1 | HQ234669 |
| <i>Jasminum nudiflorum</i>                  | NC_008407.1 | DQ673255 |
| <i>Jatropha curcas</i>                      | NC_012224.1 | FJ695500 |
| <i>Juniperus bermudiana</i>                 | NC_024021.1 | KF866297 |
| <i>Juniperus monosperma</i>                 | NC_024022.1 | KF866298 |
| <i>Juniperus scopulorum</i>                 | NC_024023.1 | KF866299 |
| <i>Juniperus virginiana</i>                 | NC_024024.1 | KF866300 |
| <i>Kalopanax septemlobus</i>                | NC_022814.1 | KC456167 |
| <i>Keteleeria davidiana</i>                 | NC_011930.1 | AP010820 |
| <i>Lactuca sativa</i>                       | NC_007578.1 | AP007232 |
| <i>Larix decidua</i>                        | NC_016058.1 | AB501189 |
| <i>Lathyrus clymenum</i>                    | NC_027148.1 | KJ850235 |
| <i>Lathyrus davidii</i>                     | NC_027073.1 | KJ806192 |
| <i>Lathyrus graminifolius</i>               | NC_027074.1 | KJ806193 |
| <i>Lathyrus inconspicuus</i>                | NC_027149.1 | KJ850236 |
| <i>Lathyrus japonicus</i>                   | NC_027075.1 | KJ806194 |
| <i>Lathyrus littoralis</i>                  | NC_027076.1 | KJ806196 |
| <i>Lathyrus ochroleucus</i>                 | NC_027077.1 | KJ806197 |
| <i>Lathyrus odoratus</i>                    | NC_027150.1 | KJ850237 |
| <i>Lathyrus palustris</i>                   | NC_027078.1 | KJ806199 |
| <i>Lathyrus pubescens</i>                   | NC_027079.1 | KJ806200 |

|                                                  |             |          |
|--------------------------------------------------|-------------|----------|
| <i>Lathyrus sativus</i>                          | NC_014063.1 | HM029371 |
| <i>Lathyrus tingitanus</i>                       | NC_027151.1 | KJ850238 |
| <i>Lathyrus venosus</i>                          | NC_027080.1 | KJ806202 |
| <i>Lecomtella madagascariensis</i>               | NC_024106.1 | HF543599 |
| <i>Leersia tisserantii</i>                       | NC_016677.1 | JN415112 |
| <i>Lemna minor</i>                               | NC_010109.1 | DQ400350 |
| <i>Lens culinaris</i>                            | NC_027152.1 | KJ850239 |
| <i>Lepidium virginicum</i> JO26                  | NC_009273.1 | AP009374 |
| <i>Lepidozamia peroffskyana</i>                  | NC_027513.1 | LC049207 |
| <i>Libidibia coriaria</i>                        | NC_026677.1 | -        |
| <i>Licania alba</i>                              | NC_024064.1 | KJ414483 |
| <i>Licania heteromorpha</i>                      | NC_024062.1 | KJ414481 |
| <i>Licania sprucei</i>                           | NC_024065.1 | KJ414484 |
| <i>Lilium hansonii</i>                           | NC_027674.1 | KM103364 |
| <i>Lilium</i> sp. KHK-2014                       | NC_027679.1 | KM103383 |
| <i>Lilium superbum</i>                           | NC_026787.1 | KP462883 |
| <i>Lilium tsingtauense</i>                       | NC_027675.1 | KM103365 |
| <i>Liquidambar formosana</i>                     | NC_023092.1 | KC588388 |
| <i>Liriodendron tulipifera</i>                   | NC_008326.1 | DQ899947 |
| <i>Lithachne pauciflora</i>                      | NC_026970.1 | KJ871002 |
| <i>Lithocarpus balansae</i>                      | NC_026577.1 | KP299291 |
| <i>Lobularia maritima</i>                        | NC_009274.1 | AP009375 |
| <i>Lolium multiflorum</i>                        | NC_019651.1 | JX871942 |
| <i>Lolium perenne</i>                            | NC_009950.1 | AM777385 |
| <i>Lonicera japonica</i>                         | NC_026839.1 | KJ170923 |
| <i>Lotus japonicus</i> Accession MG-20           | NC_002694.1 | AP002983 |
| <i>Lupinus albus</i>                             | NC_026681.1 | -        |
| <i>Lupinus luteus</i>                            | NC_023090.1 | KC695666 |
| <i>Luzuriaga radicans</i>                        | NC_025333.1 | KM233640 |
| <i>Lygodium japonicum</i>                        | NC_022136.1 | KC536645 |
| <i>Lysimachia coreana</i>                        | NC_026197.1 | KM819521 |
| <i>Macadamia integrifolia</i>                    | NC_025288.1 | KF862711 |
| <i>Macrozamia mountperriensis</i>                | NC_027511.1 | LC049069 |
| <i>Magnolia denudata</i>                         | NC_018357.1 | JN227740 |
| <i>Magnolia grandiflora</i>                      | NC_020318.1 | JN867584 |
| <i>Magnolia kwangsiensis</i>                     | NC_015892.1 | HM775382 |
| <i>Magnolia officinalis</i>                      | NC_020316.1 | JN867579 |
| <i>Magnolia officinalis</i> subsp. <i>biloba</i> | NC_020317.1 | JN867580 |
| <i>Magnolia tripetala</i>                        | NC_024027.1 | KJ408574 |
| <i>Magnolia yunnanensis</i>                      | NC_024545.1 | KF753638 |
| <i>Manihot esculenta</i>                         | NC_010433.1 | EU117376 |
| <i>Mankya chejuensis</i>                         | NC_017006.1 | JF343520 |
| <i>Marsilea crenata</i>                          | NC_022137.1 | KC536646 |
| <i>Masdevallia coccinea</i>                      | NC_026541.1 | KP205432 |
| <i>Masdevallia picturata</i>                     | NC_026777.1 | KJ566305 |
| <i>Medicago hybrida</i>                          | NC_027153.1 | KJ850240 |
| <i>Medicago papillosa</i>                        | NC_027154.1 | KJ850241 |
| <i>Megaleranthis saniculifolia</i>               | NC_012615.1 | FJ597983 |
| <i>Melianthus villosus</i>                       | NC_023256.1 | KF017614 |
| <i>Melica mutica</i>                             | NC_027477.1 | KM974742 |
| <i>Melica subulata</i>                           | NC_027478.1 | KM974743 |
| <i>Metapanax delavayi</i>                        | NC_022812.1 | KC456165 |
| <i>Metasequoia glyptostroboides</i>              | NC_027423.1 | KR061358 |
| <i>Millettia pinnata</i>                         | NC_016708.2 | JN673818 |
| <i>Monachather paradoxus</i>                     | NC_025237.1 | KJ920235 |
| <i>Monsonia speciosa</i>                         | NC_014582.1 | HM125538 |
| <i>Morus indica</i>                              | NC_008359.1 | DQ226511 |
| <i>Morus mongolica</i>                           | NC_025772.2 | KM491711 |
| <i>Morus notabilis</i>                           | NC_027110.1 | KP939360 |
| <i>Musa textilis</i>                             | NC_022926.1 | KF601567 |
| <i>Myriopteris lindheimeri</i>                   | NC_014592.1 | HM778032 |
| <i>Nageia nagi</i>                               | NC_023120.1 | AB830885 |
| <i>Najas flexilis</i>                            | NC_021936.1 | JX978472 |
| <i>Nandina domestica</i>                         | NC_008336.1 | DQ923117 |
| <i>Nasturtium officinale</i>                     | NC_009275.1 | AP009376 |
| <i>Nelumbo lutea</i>                             | NC_015605.1 | FJ754269 |
| <i>Nelumbo nucifera</i>                          | NC_025339.1 | KF009944 |
| <i>Neohouzeaua</i> sp. Clark & Attigala 1712     | NC_026963.1 | KJ870995 |
| <i>Neololeba atra</i>                            | NC_026964.1 | KJ870996 |
| <i>Nerium oleander</i>                           | NC_025656.1 | KJ953907 |
| <i>Neyraudia reynaudiana</i>                     | NC_024262.1 | KF356392 |
| <i>Nicotiana glauca</i>                          | NC_007500.1 | AB237912 |
| <i>Nicotiana glauca</i>                          | -           | Z00044.2 |
| <i>Nicotiana glauca</i>                          | NC_001879.2 | -        |
| <i>Nicotiana tomentosiformis</i>                 | NC_007602.1 | AB240139 |
| <i>Nicotiana undulata</i>                        | NC_016068.1 | JN563929 |
| <i>Nothoceros anigmaticus</i>                    | NC_020259.1 | KC285889 |
| <i>Nuphar advena</i>                             | NC_008788.1 | DQ354691 |
| <i>Nyholmiella obtusifolia</i>                   | NC_026979.1 | KP765733 |
| <i>Nymphaea alba</i>                             | NC_006050.1 | AJ627251 |
| <i>Nymphaea mexicana</i>                         | NC_024542.1 | KF753633 |

|                                                       |             |          |
|-------------------------------------------------------|-------------|----------|
| <i>Oenothera argillicola</i>                          | NC_010358.1 | EU262887 |
| <i>Oenothera biennis</i>                              | NC_010361.1 | EU262889 |
| <i>Oenothera elata</i> subsp. <i>hookeri</i>          | NC_002693.2 | -        |
| <i>Oenothera glazioviana</i>                          | NC_010360.1 | EU262890 |
| <i>Oenothera parviflora</i>                           | NC_010362.1 | EU262891 |
| <i>Olea europaea</i>                                  | NC_013707.2 | GU228899 |
| <i>Olea europaea</i> subsp. <i>cuspidata</i>          | NC_015604.1 | FN650747 |
| <i>Olea europaea</i> subsp. <i>europaea</i>           | NC_015401.1 | FN997650 |
| <i>Olea europaea</i> subsp. <i>maroccana</i>          | NC_015623.1 | FN998900 |
| <i>Olea woodiana</i> subsp. <i>woodiana</i>           | NC_015608.1 | FN998901 |
| <i>Oligostachyum shiuyingianum</i>                    | NC_024722.1 | JX513423 |
| <i>Olimarabidopsis pumila</i> JS2                     | NC_009267.1 | AP009368 |
| <i>Olmeca reflexa</i>                                 | NC_026965.1 | KJ870997 |
| <i>Olyra latifolia</i>                                | NC_024165.1 | KF515509 |
| <i>Oncidium hybrid</i> cultivar                       | NC_014056.1 | GQ324949 |
| <i>Oncinotis tenuiloba</i>                            | NC_025657.1 | KJ953908 |
| <i>Ophioglossum californicum</i>                      | NC_020147.1 | KC117178 |
| <i>Orobanche californica</i>                          | NC_025651.1 | HG515539 |
| <i>Orobanche crenata</i>                              | NC_024845.1 | HG515537 |
| <i>Orthotrichum rogeri</i>                            | NC_026212.1 | KP119739 |
| <i>Oryza australiensis</i>                            | NC_024608.1 | KJ830774 |
| <i>Oryza barthii</i>                                  | NC_027460.1 | KM881634 |
| <i>Oryza glaberrima</i>                               | NC_024175.1 | KJ513090 |
| <i>Oryza glumipatula</i>                              | NC_027461.1 | KM881640 |
| <i>Oryza longistaminata</i>                           | NC_027462.1 | KM881641 |
| <i>Oryza meridionalis</i>                             | NC_016927.1 | JN005831 |
| <i>Oryza nivara</i> SL10                              | NC_005973.1 | AP006728 |
| <i>Oryza officinalis</i>                              | NC_027463.1 | KM881643 |
| <i>Oryza punctata</i>                                 | NC_027676.1 | KM103375 |
| <i>Oryza rufipogon</i>                                | NC_017835.1 | JN005832 |
| <i>Oryza sativa</i>                                   | NC_027678.1 | KM103382 |
| <i>Oryza sativa</i> Indica Group                      | NC_008155.1 | AY522329 |
| <i>Oryza sativa</i> Japonica Group                    | NC_001320.1 | -        |
| <i>Oryzopsis asperifolia</i>                          | NC_027479.1 | KM974744 |
| <i>Osmundastrum cinnamomeum</i>                       | NC_024157.1 | KF225592 |
| <i>Otatea acuminata</i>                               | NC_026971.1 | KJ871003 |
| <i>Pachycladon cheesemanii</i>                        | NC_021102.1 | JQ806762 |
| <i>Pachycladon ensyii</i>                             | NC_018565.1 | JX205495 |
| <i>Pachyrhizus erosus</i>                             | NC_026682.1 | -        |
| <i>Paeonia obovata</i>                                | NC_026076.1 | KJ206533 |
| <i>Panax ginseng</i>                                  | NC_006290.1 | AY582139 |
| <i>Panax notoginseng</i>                              | NC_026447.1 | KJ566590 |
| <i>Panax quinquefolius</i>                            | NC_027456.1 | KM088018 |
| <i>Panicum virgatum</i>                               | NC_015990.1 | HQ822121 |
| <i>Paphiopedilum armeniacum</i>                       | NC_026779.1 | KJ566307 |
| <i>Paphiopedilum niveum</i>                           | NC_026776.1 | KJ524105 |
| <i>Pariana campestris</i>                             | NC_027491.1 | KP319244 |
| <i>Pariana radiceflora</i>                            | NC_026972.1 | KJ871004 |
| <i>Parinari campestris</i>                            | NC_024067.1 | KJ414486 |
| <i>Paris verticillata</i>                             | NC_024560.1 | KJ433485 |
| <i>Parthenium argentatum</i>                          | NC_013553.1 | GU120098 |
| <i>Pastinaca pimpinellifolia</i>                      | NC_027450.1 | KM035850 |
| <i>Pelargonium alternans</i>                          | NC_023261.1 | KF240617 |
| <i>Pelargonium x hortorum</i>                         | NC_008454.1 | DQ897681 |
| <i>Pellia endiviifolia</i>                            | NC_019628.1 | JX827163 |
| <i>Pentactina rupicola</i>                            | NC_016921.1 | JQ041763 |
| <i>Pentalinon luteum</i>                              | NC_025658.1 | KJ953909 |
| <i>Penthorum chinense</i>                             | NC_023086.1 | JX436155 |
| <i>Petrosavia stellaris</i>                           | NC_023356.1 | KF482381 |
| <i>Phaenosperma globosum</i>                          | NC_027480.1 | KM974745 |
| <i>Phalaenopsis aphrodite</i> subsp. <i>formosana</i> | NC_007499.1 | AY916449 |
| <i>Phalaenopsis equestris</i>                         | NC_017609.1 | JF719062 |
| <i>Phalaenopsis hybrid</i> cultivar                   | NC_025593.1 | KJ944326 |
| <i>Phalaris arundinacea</i>                           | NC_027481.1 | KM974746 |
| <i>Pharus lappulaceus</i>                             | NC_023245.1 | KC311467 |
| <i>Pharus latifolius</i>                              | NC_021372.1 | JN032131 |
| <i>Phaseolus vulgaris</i>                             | NC_009259.1 | DQ886273 |
| <i>Phleum alpinum</i>                                 | NC_027482.1 | KM974747 |
| <i>Phoenix dactylifera</i>                            | NC_013991.2 | GU811709 |
| <i>Phragmites australis</i>                           | NC_022958.1 | KF730315 |
| <i>Phyllostachys edulis</i>                           | NC_015817.1 | HQ337796 |
| <i>Phyllostachys nigra</i> var. <i>henonis</i>        | NC_015826.1 | HQ154129 |
| <i>Phyllostachys propinqua</i>                        | NC_016699.1 | JN415113 |
| <i>Phyllostachys sulphurea</i>                        | NC_024669.1 | KJ722540 |
| <i>Physalis peruviana</i>                             | NC_026570.1 | KP295964 |
| <i>Physcomitrella patens</i>                          | NC_005087.1 | AP005672 |
| <i>Picea abies</i>                                    | NC_021456.1 | HF937082 |
| <i>Picea morrisonicola</i>                            | NC_016069.1 | AB480556 |
| <i>Picea sitchensis</i>                               | NC_011152.3 | EU998739 |
| <i>Pinellia ternata</i>                               | NC_027681.1 | KR270823 |
| <i>Pinus gerardiana</i>                               | NC_011154.4 | EU998741 |

|                                             |             |          |
|---------------------------------------------|-------------|----------|
| <i>Pinus koraiensis</i>                     | NC_004677.2 | AY228468 |
| <i>Pinus krempfii</i>                       | NC_011155.4 | EU998742 |
| <i>Pinus lambertiana</i>                    | NC_011156.4 | EU998743 |
| <i>Pinus massoniana</i>                     | NC_021439.1 | KC427272 |
| <i>Pinus monophylla</i>                     | NC_011158.4 | EU998745 |
| <i>Pinus nelsonii</i>                       | NC_011159.4 | EU998746 |
| <i>Pinus strobus</i>                        | NC_026302.1 | KP099650 |
| <i>Pinus taeda</i>                          | NC_021440.1 | KC427273 |
| <i>Pinus taiwanensis</i>                    | NC_027415.1 | KP771703 |
| <i>Pinus thunbergii</i>                     | NC_001631.1 | D17510   |
| <i>Piper cenocladum</i>                     | NC_008457.1 | DQ887677 |
| <i>Piptochaetium avenaceum</i>              | NC_027483.1 | KM974748 |
| <i>Pisum sativum</i>                        | NC_014057.1 | HM029370 |
| <i>Platanus occidentalis</i>                | NC_008335.1 | DQ923116 |
| <i>Pleioblastus maculatus</i>               | NC_024723.1 | JX513424 |
| <i>Poa palustris</i>                        | NC_027484.1 | KM974749 |
| <i>Podocarpus lambertii</i>                 | NC_023805.1 | KJ010812 |
| <i>Podocarpus totara</i>                    | NC_020361.1 | KC306742 |
| <i>Podococcus barteri</i>                   | NC_027276.1 | KR347117 |
| <i>Populus alba</i>                         | NC_008235.1 | AP008956 |
| <i>Populus balsamifera</i>                  | NC_024735.1 | KJ664927 |
| <i>Populus euphratica</i>                   | NC_024747.1 | KJ624919 |
| <i>Populus fremontii</i>                    | NC_024734.1 | KJ664926 |
| <i>Populus tremula</i>                      | NC_027425.1 | KP861984 |
| <i>Populus trichocarpa</i>                  | NC_009143.1 | EF489041 |
| <i>Praxelis clematidea</i>                  | NC_023833.1 | KF922320 |
| <i>Premna microphylla</i>                   | NC_026291.1 | KM981744 |
| <i>Primula poissonii</i>                    | NC_024543.1 | KF753634 |
| <i>Prinsepia utilis</i>                     | NC_021455.1 | KC571835 |
| <i>Prosopis glandulosa</i>                  | NC_026683.1 | -        |
| <i>Prunus kansuensis</i>                    | NC_023956.1 | KF990036 |
| <i>Prunus maximowiczii</i>                  | NC_026981.1 | KP760071 |
| <i>Prunus mume</i>                          | NC_023798.1 | KF765450 |
| <i>Prunus padus</i>                         | NC_026982.1 | KP760072 |
| <i>Prunus persica</i>                       | NC_014697.1 | HQ336405 |
| <i>Prunus yedoensis</i>                     | NC_026980.1 | KP760070 |
| <i>Pseudophoenix vinifera</i>               | NC_020364.1 | JX088662 |
| <i>Pseudotsuga sinensis var. wilsoniana</i> | NC_016064.1 | AB601120 |
| <i>Psilotum nudum</i>                       | NC_003386.1 | AP004638 |
| <i>Pteridium aquilinum subsp. aquilinum</i> | NC_014348.1 | HM535629 |
| <i>Ptilidium pulcherrimum</i>               | NC_015402.1 | HM222519 |
| <i>Puccinellia nuttalliana</i>              | NC_027485.1 | KM974750 |
| <i>Pyrus pyrifolia</i>                      | NC_015996.1 | AP012207 |
| <i>Pyrus spinosa</i>                        | NC_023130.1 | HG737342 |
| <i>Quercus aliena</i>                       | NC_026790.1 | KP301144 |
| <i>Quercus aquifolioides</i>                | NC_026913.1 | KP340971 |
| <i>Quercus rubra</i>                        | NC_020152.1 | JX970937 |
| <i>Quercus spinosa</i>                      | NC_026907.1 | KM841421 |
| <i>Raddia brasiliensis</i>                  | NC_026966.1 | KJ870998 |
| <i>Ranunculus macranthus</i>                | NC_008796.1 | DQ359689 |
| <i>Ravenala madagascariensis</i>            | NC_022927.1 | KF601568 |
| <i>Retrophyllum piresii</i>                 | NC_024827.1 | KJ617081 |
| <i>Rhazya stricta</i>                       | NC_024292.1 | KJ485849 |
| <i>Rheum palmatum</i>                       | NC_027728.1 | KR816224 |
| <i>Rhynchoryza subulata</i>                 | NC_016718.1 | JN415114 |
| <i>Ricinus communis</i>                     | NC_016736.1 | JF937588 |
| <i>Robinia pseudoacacia</i>                 | NC_026684.1 | -        |
| <i>Rosmarinus officinalis</i>               | NC_027259.1 | KR232566 |
| <i>Sabal domingensis</i>                    | NC_026444.1 | KF928963 |
| <i>Saccharum hybrid cultivar SP80-3280</i>  | NC_005878.2 | AE009947 |
| <i>Saccharum officinarum</i>                | NC_006084.1 | AP006714 |
| <i>Salicornia bigelovii</i>                 | NC_027226.1 | KJ629117 |
| <i>Salicornia brachiata</i>                 | NC_027224.1 | KJ629115 |
| <i>Salicornia europaea</i>                  | NC_027225.1 | KJ629116 |
| <i>Salix interior</i>                       | NC_024681.1 | KJ742926 |
| <i>Salix purpurea</i>                       | NC_026722.1 | KP019639 |
| <i>Salix suchowensis</i>                    | NC_026462.1 | KM983390 |
| <i>Salvia miltiorrhiza</i>                  | NC_020431.1 | JX312195 |
| <i>Sanionia uncinata</i>                    | NC_025668.1 | KM111545 |
| <i>Sapindus mukorossi</i>                   | NC_025554.1 | KM454982 |
| <i>Saracha punctata</i>                     | NC_026694.1 | KP280050 |
| <i>Sarocalamus faberi</i>                   | NC_024713.1 | JX513414 |
| <i>Sartidia dewinteri</i>                   | NC_027147.1 | KJ819550 |
| <i>Sartidia perrieri</i>                    | NC_027146.1 | KJ819549 |
| <i>Schefflera delavayi</i>                  | NC_022813.1 | KC456166 |
| <i>Schwalbea americana</i>                  | NC_023115.1 | HG738866 |
| <i>Scrophularia takesimensis</i>            | NC_026202.1 | KM590983 |
| <i>Scutellaria baicalensis</i>              | NC_027262.1 | KR233163 |
| <i>Secale cereale</i>                       | NC_021761.1 | KC912691 |
| <i>Sedum sarmentosum</i>                    | NC_023085.1 | JX427551 |
| <i>Sedum takesimense</i>                    | NC_026065.1 | KF954541 |

|                                     |             |            |
|-------------------------------------|-------------|------------|
| <i>Selaginella moellendorffii</i>   | NC_013086.1 | FJ755183   |
| <i>Sesamum indicum</i>              | NC_016433.2 | -          |
| <i>Seseli montanum</i>              | NC_027451.1 | KM035851   |
| <i>Setaria italica</i>              | NC_022850.1 | KF646538   |
| <i>Silene chalconica</i>            | NC_023359.1 | KF527886   |
| <i>Silene conica</i>                | NC_016729.1 | JF715054   |
| <i>Silene conoidea</i>              | NC_023358.1 | KF527885   |
| <i>Silene latifolia</i>             | NC_016730.1 | JF715055   |
| <i>Silene noctiflora</i>            | NC_016728.1 | JF715056   |
| <i>Silene paradoxa</i>              | NC_023360.1 | KF527887   |
| <i>Silene vulgaris</i>              | NC_016727.1 | JF715057   |
| <i>Sinopodophyllum hexandrum</i>    | NC_027732.1 | KR779994   |
| <i>Solanum bulbocastanum</i>        | NC_007943.1 | DQ347958   |
| <i>Solanum cheesmaniae</i>          | NC_026876.1 | KP117020   |
| <i>Solanum chilense</i>             | NC_026877.1 | KP117021   |
| <i>Solanum galapagense</i>          | NC_026878.1 | KP117022   |
| <i>Solanum habrochaites</i>         | NC_026879.1 | KP117023   |
| <i>Solanum lycopersicum</i>         | AC_000188.1 | AM087200   |
| <i>Solanum lycopersicum</i>         | NC_007898.3 | DQ347959   |
| <i>Solanum neorickii</i>            | NC_026880.1 | KP117025   |
| <i>Solanum pennellii</i>            | NC_024584.1 | HG975452   |
| <i>Solanum peruvianum</i>           | NC_026881.1 | KP117026   |
| <i>Solanum pimpinellifolium</i>     | NC_026882.1 | KP117027   |
| <i>Solanum tuberosum</i>            | NC_008096.2 | DQ386163   |
| <i>Sorghum bicolor</i>              | NC_008602.1 | EF115542   |
| <i>Sorghum timorense</i>            | NC_023800.1 | KF998272   |
| <i>Spinacia oleracea</i>            | NC_002202.1 | -          |
| <i>Spirodela polyrhiza 7498</i>     | NC_015891.1 | JN160603   |
| <i>Sporobolus maritimus</i>         | NC_027650.1 | KP176438   |
| <i>Stangeria eriopus</i>            | NC_026041.1 | JX416858   |
| <i>Stipa hymenoides</i>             | NC_027464.1 | KM974729   |
| <i>Stockwellia quadrifida</i>       | NC_022414.1 | KC180807   |
| <i>Syntrichia ruralis</i>           | NC_012052.1 | FJ546412   |
| <i>Taiwania cryptomerioides</i>     | NC_016065.1 | AP012266   |
| <i>Taiwania flousiana</i>           | NC_021441.1 | KC427274   |
| <i>Tamarindus indica</i>            | NC_026685.1 | -          |
| <i>Taxus mairei</i>                 | NC_020321.1 | JN867586   |
| <i>Tectona grandis</i>              | NC_020098.1 | HF567869   |
| <i>Tectona grandis</i>              | -           | HF567870.1 |
| <i>Tectona grandis</i>              | -           | HF567871.1 |
| <i>Tetracentron sinense</i>         | NC_021425.1 | KC608752   |
| <i>Tetraphis pellucida</i>          | NC_024291.1 | KJ817846   |
| <i>Thalictrum coreanum</i>          | NC_026103.1 | KM206568   |
| <i>Thamnocalamus spathiflorus</i>   | NC_024724.1 | JX513425   |
| <i>Theobroma cacao</i>              | NC_014676.2 | HQ244500   |
| <i>Thysanolaena latifolia</i>       | NC_025238.1 | KJ920236   |
| <i>Torreyochloa pallida</i>         | NC_027486.1 | KM974752   |
| <i>Trachelium caeruleum</i>         | NC_010442.1 | EU090187   |
| <i>Trifolium aureum</i>             | NC_024035.1 | KC894708   |
| <i>Trifolium boissieri</i>          | NC_025743.1 | KJ788284   |
| <i>Trifolium glanduliferum</i>      | NC_025744.1 | KJ788285   |
| <i>Trifolium grandiflorum</i>       | NC_024034.1 | KC894707   |
| <i>Trifolium meduseum</i>           | NC_024166.1 | KJ476730   |
| <i>Trifolium repens</i>             | NC_024036.1 | KC894706   |
| <i>Trifolium strictum</i>           | NC_025745.1 | KJ788292   |
| <i>Trifolium subterraneum</i>       | NC_011828.1 | EU849487   |
| <i>Trigonobalanus doichangensis</i> | NC_023959.1 | KF990556   |
| <i>Trillium cuneatum</i>            | NC_027185.1 | KR135077   |
| <i>Trillium decumbens</i>           | NC_027282.1 | KR534612   |
| <i>Trillium maculatum</i>           | NC_027738.1 | KR780075   |
| <i>Trillium tschonoskii</i>         | NC_027739.1 | KR780076   |
| <i>Trisetum cernuum</i>             | NC_027487.1 | KM974753   |
| <i>Trithuria inconspicua</i>        | NC_020372.1 | HE963749   |
| <i>Triticum aestivum</i>            | NC_002762.1 | AB042240   |
| <i>Triticum macha</i>               | NC_025955.1 | LC005978   |
| <i>Triticum monococcum</i>          | NC_021760.1 | KC912690   |
| <i>Triticum timopheevii</i>         | NC_024764.1 | KJ614410   |
| <i>Triticum turgidum</i>            | NC_024814.1 | KJ614397   |
| <i>Triticum urartu</i>              | NC_021762.1 | KC912693   |
| <i>Trochodendron aralioides</i>     | NC_021426.1 | KC608753   |
| <i>Typha latifolia</i>              | NC_013823.1 | GU195652   |
| <i>Utricularia gibba</i>            | NC_021449.1 | KC997777   |
| <i>Utricularia macrorhiza</i>       | NC_025653.1 | HG803177   |
| <i>Vaccinium macrocarpon</i>        | NC_019616.1 | JQ757046   |
| <i>Vanilla planifolia</i>           | NC_026778.1 | KJ566306   |
| <i>Veratrum patulum</i>             | NC_022715.2 | KF437397   |
| <i>Vicia sativa</i>                 | NC_027155.1 | KJ850242   |
| <i>Vigna angularis</i>              | NC_021091.1 | AP012598   |
| <i>Vigna radiata</i>                | NC_013843.1 | GQ893027   |
| <i>Vigna unguiculata</i>            | NC_018051.1 | JQ755301   |
| <i>Viola seoulensis</i>             | NC_026986.1 | KP749924   |

|                                  |             |          |
|----------------------------------|-------------|----------|
| <i>Vitis rotundifolia</i>        | NC_023790.1 | KF976463 |
| <i>Vitis vinifera</i>            | NC_007957.1 | DQ424856 |
| <i>Viviania marifolia</i>        | NC_023259.1 | KF240615 |
| <i>Welwitschia mirabilis</i>     | NC_010654.1 | EU342371 |
| <i>Wisteria floribunda</i>       | NC_027677.1 | KM103376 |
| <i>Wolffia australiana</i> 7733  | NC_015899.1 | JN160605 |
| <i>Wolffiella lingulata</i> 7289 | NC_015894.1 | JN160604 |
| <i>Wollemia nobilis</i>          | NC_027235.1 | KP259800 |
| <i>Xerophyllum tenax</i>         | NC_027158.1 | KM078035 |
| <i>Yushania levigata</i>         | NC_024725.1 | JX513426 |
| <i>Zamia furfuracea</i>          | NC_026040.1 | JX416857 |
| <i>Zea mays</i>                  | NC_001666.2 | X86563   |
| <i>Zingiber spectabile</i>       | NC_020363.1 | JX088661 |
| <i>Zizania aquatica</i>          | NC_026967.1 | KJ870999 |



**Supplementary Table S4. Performance of plant core barcode in metabarcoding studies.** Diagnostic value (percent species identified) of the core land plant barcode (*rbcl* + *matK*) reported by large barcoding studies (comparing >50 diverse species). Maximum estimate is shown when more than one method of species diagnosis was applied. \*Approximate value taken from Figure 4

| Reference                          | No. of species | Percent diagnosis |
|------------------------------------|----------------|-------------------|
| 1. Burgess et al. (2011)           | 436            | 93                |
| 2. China Plant BOL Group (2011)    | 1757           | 53                |
| 3. Clement and Donoghue (2012)     | 112            | 53                |
| 4. De Vere et al. (2012)           | 1143           | 75                |
| 5. Dong et al. (2015)              | 490            | 71                |
| 6. Gere et al (2013)               | 58             | 61                |
| 7. CBOL Plant Working Group (2011) | 550            | 72                |
| 8. Huang et al. (2015)             | 655            | 48                |
| 9. Kim et al. (2014)               | 84             | 86                |
| 10. Kuzmina et al. (2012)          | 286            | 54                |
| 11. Li et al. (2012)               | 1319           | 55                |
| 12. Little et al. (2013)           | 145            | 46                |
| 13. Liu et al. (2014)              | 149            | 40                |
| 14. Mangka et al. (2013)           | 108            | 97                |
| 15. Pang et al. (2011)             | 52             | 96                |
| 16. Pei et al. (2015)              | 896            | 73                |
| 17. Saarela et al. (2013)          | 312            | 56                |
| 18. Yan et al. (2015)              | 173            | 30                |
| 19. Yu et al. (2011)               | 88             | 70*               |

#### Full references

- Burgess, K. S. *et al.* Discriminating plant species in a local temperate flora using the *rbcl* + *matK* DNA barcode. *Methods Ecol. Evol.* **2**, 333-340 (2011).
- China Plant BOL Group. Comparative analysis of a large dataset indicated that internal transcribed spacer (ITS) should be incorporated in the core barcode for seed plants. *Proc. Natl. Acad. Sci. USA.* **108**, 19641-19646 (2011).
- Clement, W. L., Donoghue, M. J. Barcoding success as a function of phylogenetic relatedness in *Viburnum*, a clade of woody angiosperms. *BMC Evol. Biol.* **12**, 73 (2012).
- De Vere, N. *et al.* DNA barcoding the native flowering plants and conifers of Wales. *PloS ONE* **7**, e37945 (2012).
- Dong, W. *et al.* *ycf1*, the most promising plastid DNA barcode of land plants. *Sci. Rep.* **5**, 8348 (2015).
- Gere, J. *et al.* Incorporating *trnH-psbA* to the core DNA barcodes improves significantly species discrimination within southern African Combretaceae. *ZooKeys* **365**, 129-147 (2013).
- CBOL Plant Working Group. A DNA barcode for land plants. *Proc. Natl. Acad. Sci. USA.* **106**, 12794-12797 (2011).
- Huang, X. -C., Ci, X. -Q., Conran, J. G., Li, J. Application of DNA barcodes in Asian tropical trees – a case study from Xishuangbanna nature reserve, Southwest China. *PloS ONE* **10**, e0129295 (2015).
- Kim, H. M., Oh, S. -H., Bhandari, G. S., Kim, C. -S., Park, C. -W. DNA barcoding of Orchidaceae in Korea. *Mol. Ecol. Res.* **14**, 499-507 (2014).
- Kuzmina, M. L., Johnson, K. L., Barron, H. R., Hebert, P. D. N. Identification of the vascular plants of Churchill, Manitoba, using a DNA barcode library. *BMC Ecol.* **12**, 25 (2012).
- Li, C. P., Yu, Z. G., Han, G. S., Chu, K. H. Analyzing multi-locus plant barcoding datasets with a composition vector method based on adjustable weighted distance. *PloS ONE* **7**, 42154 (2012).
- Little, D. P., Knopf, P., Schulz, C. DNA barcode identification of Podocarpaceae – the second largest conifer family. *PloS ONE* **8**, e81008 (2013).
- Liu, J. *et al.* Identification of species in the angiosperm family Apiaceae using DNA barcodes. *Mol. Ecol. Res.* **14**, 1231-1238 (2014).
- Mangka, L. T., Yessoufou, K., Moteetee, A. M., Daru, B. H., van der Bank, M. Efficacy of the core DNA barcodes in identifying processed and poorly conserved plant materials commonly used in South African traditional medicine. *ZooKeys* **365**, 215-233 (2013).
- Pang, X. *et al.* Applying plant DNA barcodes for Rosaceae species identification. *Cladistics* **27**, 165-170 (2011).
- Pei, N. *et al.* Closely-related taxa influence woody species discrimination via DNA barcoding: evidence from global dynamics plots. *Sci. Rep.* **5**, 15127 (2015).
- Saarela, J. M., Sokoloff, P. C., Gillespie, L. J., Consaul, L. L., Bull, R. D. DNA barcoding the Canadian arctic flora: core plastid barcodes (*rbcl* + *matK*) for 490 vascular plant species. *PloS ONE* **8**, e77982 (2013).
- Yan, L. -J. *et al.* DNA barcoding of *Rhododendron* (Ericaceae), the largest Chinese plant genus in biodiversity hotspots of the Himalaya-Hengduan Mountains. *Mol. Ecol. Res.* **15**, 932-944 (2015).
- Yu, W. B. *et al.* DNA barcoding of *Pedicularis* Linn. (Orobanchaceae): evaluating four universal barcode loci in a large and hemiparasitic genus. *J. Syst. Evol.* **49**, 425-437 (2011).

**Supplementary Table S5. Specimens used for conventional and Next Generation reference barcoding.** List of plant species collected from the Murraylands and Waite Arboretum, South Australia for which *de novo* barcoding was performed for *rbcl* and *matK* via conventional Sanger sequencing, and the Illumina V3 MiSeq Platform using the Extended Unidirectional Sequencing (EUS) and Sonication MicroAssembly (SMA) methods. Key: - = reaction not performed; X = reaction failed.

| Accession Number | Species                           | Collection Site | Latitude   | Longitude  | Recovered sequence length (base pairs) |        |                     |        |       |                 |      |
|------------------|-----------------------------------|-----------------|------------|------------|----------------------------------------|--------|---------------------|--------|-------|-----------------|------|
|                  |                                   |                 |            |            | rbcl barcode region                    |        | matK barcode region |        |       | SMA gene-length |      |
|                  |                                   |                 |            |            | EUS                                    | Sanger | SMA                 | Sanger | Diff. | rbcl            | matK |
| M75              | <i>Acacia nyssophylla</i>         | Murraylands     | -34.538481 | 139.591213 | 553                                    | 553    | 898                 | 867    | 31    | -               | -    |
| M63              | <i>Ajuga iva</i>                  | Murraylands     | -34.531619 | 139.585348 | 553                                    | 553    | 904                 | 879    | 25    | -               | -    |
| M53              | <i>Alectryon oleifolius</i>       | Murraylands     | -34.460922 | 139.472026 | 553                                    | 553    | 898                 | 869    | 29    | -               | -    |
| M38              | <i>Amyema miquelli</i>            | Murraylands     | -34.461621 | 139.472463 | 553                                    | 553    | 910                 | 865    | 45    | -               | -    |
| M74              | <i>Amyema preissii</i>            | Murraylands     | -34.538481 | 139.591213 | 553                                    | 553    | 901                 | 865    | 36    | -               | -    |
| 529              | <i>Araucaria bidwillii</i>        | Waite Arboretum | 34° 58' S  | 138° 37' E | -                                      | -      | 898                 | -      | -     | -               | -    |
| 521              | <i>Araucaria cunninghamii</i>     | Waite Arboretum | 34° 58' S  | 138° 37' E | -                                      | -      | X                   | -      | -     | -               | -    |
| M80              | <i>Asphodelus fistulosus</i>      | Murraylands     | -34.381057 | 139.531638 | 553                                    | 553    | 916                 | 880    | 36    | -               | -    |
| X94              | <i>Asteridea athrixoides</i>      | Murraylands     | -34.461328 | 139.472276 | 553                                    | 553    | 904                 | 874    | 30    | -               | -    |
| M62              | <i>Atriplex stipitata</i>         | Murraylands     | -34.531619 | 139.585348 | 553                                    | 553    | -                   | 913    | -     | -               | -    |
| M5               | <i>Austrostipa drummondii</i>     | Murraylands     | -34.461294 | 139.472163 | 553                                    | 553    | 898                 | 888    | 10    | 1333            | 1471 |
| M22              | <i>Austrostipa drummondii</i>     | Murraylands     | -34.460958 | 139.471688 | 553                                    | 553    | 898                 | 888    | 10    | -               | -    |
| M2               | <i>Austrostipa elegantissima</i>  | Murraylands     | -34.461097 | 139.472694 | 553                                    | 553    | 898                 | 888    | 10    | 1333            | 1471 |
| M28              | <i>Austrostipa elegantissima</i>  | Murraylands     | -34.461045 | 139.472189 | X                                      | 553    | 898                 | 858    | 40    | X               | X    |
| M59              | <i>Austrostipa eremophila</i>     | Murraylands     | -34.531619 | 139.585348 | 553                                    | 553    | 898                 | 886    | 12    | 1333            | 1471 |
| M4               | <i>Austrostipa hemipogon</i>      | Murraylands     | -34.461243 | 139.472235 | 553                                    | 553    | 898                 | 888    | 10    | 1333            | 1471 |
| M44              | <i>Austrostipa puberula</i>       | Murraylands     | -34.461206 | 139.472078 | 553                                    | 553    | 898                 | 868    | 30    | 1333            | X    |
| M43              | <i>Austrostipa scabra falcata</i> | Murraylands     | -34.461206 | 139.472078 | 553                                    | 553    | 898                 | 887    | 11    | X               | X    |
| M32              | <i>Austrostipa sp.</i>            | Murraylands     | -34.461045 | 139.472189 | 553                                    | 553    | 898                 | 889    | 9     | -               | -    |
| M1               | <i>Austrostipa sp.</i>            | Murraylands     | -34.461045 | 139.472189 | 553                                    | 553    | 898                 | 866    | 32    | -               | -    |
| M81              | <i>Austrostipa sp.</i>            | Murraylands     | -34.380974 | 139.533341 | 553                                    | 553    | 898                 | 887    | 11    | -               | -    |
| M16              | <i>Austrostipa sp.</i>            | Murraylands     | -34.461294 | 139.471973 | 553                                    | 553    | 898                 | 893    | 5     | -               | -    |
| X88              | <i>Austrostipa sp.</i>            | Murraylands     | -34.374865 | 139.530738 | 553                                    | 553    | 898                 | 898    | 0     | -               | -    |
| A114             | <i>Brachyscome ciliaris</i>       | Murraylands     | -34.456677 | 139.478655 | 553                                    | 553    | 892                 | 852    | 40    | -               | -    |
| X95              | <i>Brachyscome ciliaris</i>       | Murraylands     | -34.461433 | 139.472332 | 553                                    | 553    | -                   | 856    | -     | -               | -    |
| M20              | <i>Brachyscome ciliaris</i>       | Murraylands     | -34.461227 | 139.471778 | 553                                    | 553    | 892                 | 862    | 30    | -               | -    |
| M48              | <i>Brassica tournefortii</i>      | Murraylands     | -34.461234 | 139.47243  | 553                                    | 553    | -                   | 790    | -     | -               | -    |
| X84              | <i>Bromus madritensis</i>         | Murraylands     | -34.538808 | 139.590432 | 553                                    | 553    | -                   | 856    | -     | 1333            | X    |
| M11              | <i>Bupleurum semicompositum</i>   | Murraylands     | -34.461294 | 139.471973 | 553                                    | 553    | 889                 | 861    | 28    | -               | -    |
| X93              | <i>Bupleurum semicompositum</i>   | Murraylands     | -34.461433 | 139.472332 | 553                                    | 553    | 889                 | 862    | 27    | -               | -    |
| 1022a            | <i>Callitris rhomboidea</i>       | Waite Arboretum | 34° 58' S  | 138° 37' E | -                                      | -      | X                   | -      | -     | -               | -    |
| M68              | <i>Calotis hispidula</i>          | Murraylands     | -34.531488 | 139.585158 | 553                                    | 553    | 892                 | 858    | 34    | -               | -    |

|      |                                                           |                 |            |            |     |     |     |     |    |      |      |
|------|-----------------------------------------------------------|-----------------|------------|------------|-----|-----|-----|-----|----|------|------|
| B116 | <i>Carrichtera annua</i>                                  | Murraylands     | -34.461541 | 139.473541 | X   | 553 | 883 | 849 | 34 | -    | -    |
| M83  | <i>Convolvulus angustissimus</i> ssp. <i>peninsularum</i> | Murraylands     | -34.38073  | 139.531513 | 553 | 553 | 904 | 878 | 26 | -    | -    |
| M39A | <i>Crassula colorata</i>                                  | Murraylands     | -34.461045 | 139.472189 | 553 | 553 | -   | -   | -  | -    | -    |
| 563  | <i>Cupressus glabra</i>                                   | Waite Arboretum | 34° 58' S  | 138° 37' E | -   | -   | X   | -   | -  | -    | -    |
| 1024 | <i>Cupressus jiangeensis</i>                              | Waite Arboretum | 34° 58' S  | 138° 37' E | -   | -   | X   | -   | -  | -    | -    |
| M51  | <i>Dissocarpus paradoxus</i>                              | Murraylands     | -34.460927 | 139.472364 | 553 | 553 | 898 | 887 | 11 | 1333 | 1461 |
| M65  | <i>Einadia nutans</i> ssp. <i>nutans</i>                  | Murraylands     | -34.531488 | 139.585158 | 553 | 553 | 898 | 889 | 9  | 1333 | 1470 |
| M41  | <i>Enchylaena tomentosa</i>                               | Murraylands     | -34.461179 | 139.472078 | 553 | 553 | -   | 889 | -  | X    | 1461 |
| M46  | <i>Enchylaena tomentosa</i> var. <i>tomentosa</i>         | Murraylands     | -34.461233 | 139.472259 | 553 | 553 | 898 | 856 | 42 | 1333 | 1470 |
| X102 | <i>Eremophila glabra</i>                                  | Murraylands     | -34.464857 | 139.475058 | 553 | 553 | 904 | 873 | 31 | -    | -    |
| M56B | <i>Eremophila scoparia</i>                                | Murraylands     | -34.476497 | 139.438005 | 553 | 553 | 904 | 896 | 8  | -    | -    |
| M23  | <i>Eriochiton sclerolaenoides</i>                         | Murraylands     | -34.460958 | 139.471688 | 553 | 553 | -   | 867 | -  | 1333 | 1461 |
| M8   | <i>Eriochiton sclerolaenoides</i>                         | Murraylands     | -34.46137  | 139.472157 | X   | 553 | X   | 889 | -  | 1333 | 1461 |
| A107 | <i>Eriochiton sclerolaenoides</i>                         | Murraylands     | -34.456677 | 139.478655 | 553 | 553 | 898 | 868 | 30 | -    | -    |
| M26  | <i>Eriochiton sclerolaenoides</i>                         | Murraylands     | -34.461419 | 139.47212  | 553 | 553 | 898 | 860 | 38 | 1333 | X    |
| A110 | <i>Erodium crinitum</i>                                   | Murraylands     | -34.456677 | 139.478655 | 553 | 553 | -   | 872 | -  | -    | -    |
| X91  | <i>Erodium crinitum</i>                                   | Murraylands     | -34.461328 | 139.472276 | X   | 553 | -   | 894 | -  | -    | -    |
| M69  | <i>Euphorbia drummondii</i>                               | Murraylands     | -34.531648 | 139.585179 | 553 | 553 | 904 | 875 | 29 | -    | -    |
| M29  | <i>Festuca</i> or <i>Vulpia</i> sp.                       | Murraylands     | -34.461045 | 139.472189 | 553 | 553 | 898 | 860 | 38 | -    | -    |
| X96  | <i>Geijera linearifolia</i>                               | Murraylands     | -34.460979 | 139.471614 | 553 | 553 | 898 | 866 | 32 | -    | -    |
| M73  | <i>Goodenia pinnatifida</i>                               | Murraylands     | -34.538668 | 139.590656 | 553 | 553 | 904 | 874 | 30 | -    | -    |
| A112 | <i>Goodenia pusilliflora</i>                              | Murraylands     | -34.456677 | 139.478655 | 553 | 553 | 904 | 877 | 27 | -    | -    |
| X90  | <i>Goodenia pusilliflora</i>                              | Murraylands     | -34.461328 | 139.472276 | 553 | 553 | 904 | 902 | 2  | -    | -    |
| X85  | <i>Herniaria cinerea</i>                                  | Murraylands     | -34.461711 | 139.472935 | 553 | 553 | 898 | 867 | 31 | -    | -    |
| M78  | <i>Hordeum glaucum</i>                                    | Murraylands     | -34.538569 | 139.590701 | 553 | 553 | 898 | 860 | 38 | -    | -    |
| X92  | <i>Hyalosperma semisterile</i>                            | Murraylands     | -34.461328 | 139.472276 | 553 | 553 | 916 | 885 | 31 | -    | -    |
| A111 | <i>Hyalosperma semisterile</i>                            | Murraylands     | -34.456677 | 139.478655 | 553 | 553 | 916 | 886 | 30 | -    | -    |
| M12  | <i>Hypochaeris radicata</i>                               | Murraylands     | -34.461294 | 139.471973 | X   | 553 | 904 | 904 | 0  | -    | -    |
| 1285 | <i>Juniperus excelsa</i>                                  | Waite Arboretum | 34° 58' S  | 138° 37' E | -   | -   | X   | -   | -  | -    | -    |
| X86  | <i>Maireana georgei</i>                                   | Murraylands     | -34.538201 | 139.595721 | 553 | 553 | -   | 847 | -  | 1333 | X    |
| M45  | <i>Maireana lobiflora</i>                                 | Murraylands     | -34.461252 | 139.472084 | 553 | 553 | 898 | 888 | 10 | 1333 | 1461 |
| M36  | <i>Maireana</i> sp.                                       | Murraylands     | -34.461166 | 139.472206 | 553 | 553 | -   | 855 | -  | -    | -    |
| M39B | <i>Malva parviflora</i>                                   | Murraylands     | -34.461442 | 139.472332 | 553 | 553 | -   | X   | -  | -    | -    |
| M72  | <i>Marrubium vulgare</i>                                  | Murraylands     | -34.538546 | 139.590425 | 553 | 553 | 904 | 875 | 29 | -    | -    |
| M60  | <i>Medicago minima</i>                                    | Murraylands     | -34.531619 | 139.585348 | 553 | 553 | 856 | 826 | 30 | -    | -    |
| M54  | <i>Melaleuca lanceolata</i>                               | Murraylands     | -34.461426 | 139.472555 | 553 | 553 | 895 | 884 | 11 | -    | -    |
| M56A | <i>Mesembryanthemum crystallinum</i>                      | Murraylands     | -34.539971 | 139.597051 | 553 | 553 | 898 | 898 | 0  | -    | -    |
| M9   | <i>Moraea setifolia</i>                                   | Murraylands     | -34.461311 | 139.472139 | 553 | 553 | 922 | 883 | 39 | -    | -    |
| M40  | <i>Moraea setifolia</i>                                   | Murraylands     | -34.461045 | 139.472189 | 553 | 553 | 922 | 884 | 38 | -    | -    |
| M52  | <i>Myoporum parvifolium</i>                               | Murraylands     | -34.460922 | 139.472026 | 553 | 553 | 904 | 875 | 29 | -    | -    |
| M77  | <i>Nicotiana glauca</i>                                   | Murraylands     | -34.538568 | 139.59091  | 553 | 553 | 898 | 890 | 8  | -    | -    |
| A109 | <i>Nicotiana goodspeedii</i>                              | Murraylands     | -34.459823 | 139.470087 | 553 | 553 | 898 | 889 | 9  | -    | -    |

|      |                                                        |                 |            |            |     |     |     |     |    |      |       |
|------|--------------------------------------------------------|-----------------|------------|------------|-----|-----|-----|-----|----|------|-------|
| M37  | <i>Nicotiana goodspeedii</i>                           | Murraylands     | -34.461252 | 139.472084 | 553 | 553 | 898 | 889 | 9  | -    | -     |
| M15  | <i>Oxalis perennans</i>                                | Murraylands     | -34.461294 | 139.471973 | 553 | 553 | -   | 913 | -  | -    | -     |
| B118 | <i>Pimelea micrantha</i>                               | Murraylands     | -34.461541 | 139.473541 | X   | 553 | -   | X   | -  | -    | -     |
| 527  | <i>Pinus nigra</i>                                     | Waite Arboretum | 34° 58' S  | 138° 37' E | -   | -   | X   | -   | -  | -    | -     |
| 538  | <i>Podocarpus elatus</i>                               | Waite Arboretum | 34° 58' S  | 138° 37' E | -   | -   | X   | -   | -  | -    | -     |
| M13  | <i>Ptilotus seminudus</i>                              | Murraylands     | -34.461294 | 139.471973 | 553 | 553 | 892 | 844 | 48 | -    | -     |
| M18  | <i>Ptilotus spathulatus</i>                            | Murraylands     | -34.461219 | 139.471837 | 553 | 553 | 892 | 849 | 43 | -    | -     |
| X100 | <i>Rhagodia candolleana</i>                            | Murraylands     | -34.464857 | 139.475058 | 553 | 553 | -   | 858 | -  | 1333 | 1470  |
| X97  | <i>Rhagodia crassifolia</i>                            | Murraylands     | -34.464857 | 139.475058 | 553 | 553 | 898 | 874 | 24 | 1333 | 1461  |
| X99  | <i>Rhagodia crassifolia</i> X <i>R. candolleana</i>    | Murraylands     | -34.464857 | 139.475058 | 553 | 553 | 898 | 875 | 23 | X    | 1470  |
| M49  | <i>Rhagodia</i> hybrid                                 | Murraylands     | -34.460852 | 139.472201 | 553 | 553 | 898 | 850 | 48 | 1333 | 1470  |
| M67  | <i>Rhagodia parabolica</i>                             | Murraylands     | -34.531488 | 139.585158 | 553 | 553 | 898 | 860 | 38 | 1333 | 1470  |
| M64  | <i>Rhagodia parabolica</i>                             | Murraylands     | -34.531488 | 139.585158 | 553 | 553 | -   | 898 | -  | 1333 | 1494  |
| M76  | <i>Rhagodia</i> sp.                                    | Murraylands     | -34.538481 | 139.591213 | 553 | 553 | -   | 871 | -  | -    | -     |
| X101 | <i>Rhagodia spinescens</i>                             | Murraylands     | -34.464857 | 139.475058 | 553 | 553 | -   | 845 | -  | 1333 | 1470  |
| X98  | <i>Rhagodia spinescens</i>                             | Murraylands     | -34.464857 | 139.475058 | 553 | 553 | -   | 849 | -  | 1333 | 1470  |
| M10  | <i>Rostraria cristata</i>                              | Murraylands     | -34.461294 | 139.471973 | 553 | 553 | -   | X   | -  | -    | -     |
| M33  | <i>Rostraria cristata</i>                              | Murraylands     | -34.461145 | 139.47233  | 553 | 553 | -   | X   | -  | -    | -     |
| M42  | <i>Rytidosperma caespitosa</i>                         | Murraylands     | -34.461206 | 139.472078 | 553 | 553 | -   | 801 | -  | 1333 | 1471  |
| M3   | <i>Rytidosperma caespitosa</i>                         | Murraylands     | -34.461045 | 139.472189 | 553 | 553 | 898 | 872 | 26 | 1333 | 1471  |
| M82  | <i>Rytidosperma caespitosa</i>                         | Murraylands     | -34.380974 | 139.533341 | 553 | 553 | 898 | 886 | 12 | 1333 | 1471  |
| M61  | <i>Rytidosperma caespitosa</i>                         | Murraylands     | -34.531619 | 139.585348 | 553 | 553 | -   | 898 | -  | 1333 | 1471  |
| M7   | <i>Rytidosperma caespitosa</i>                         | Murraylands     | -34.461319 | 139.472236 | 553 | 553 | -   | 856 | -  | 1333 | X     |
| M27  | <i>Rytidosperma caespitosa</i>                         | Murraylands     | -34.461045 | 139.472189 | 553 | 553 | -   | 881 | -  | 1333 | 1470? |
| M17  | <i>Rytidosperma</i> sp.                                | Murraylands     | -34.461219 | 139.471837 | X   | 553 | -   | 885 | -  | -    | -     |
| M57  | <i>Schismus barbatus</i>                               | Murraylands     | -34.53216  | 139.586191 | 553 | 553 | -   | 845 | -  | 1333 | X     |
| M71  | <i>Schismus barbatus</i>                               | Murraylands     | -34.531648 | 139.585179 | 553 | 553 | 898 | 893 | 5  | 1333 | X     |
| M70  | <i>Schismus barbatus</i>                               | Murraylands     | -34.531648 | 139.585179 | 553 | 553 | 898 | 898 | 0  | 1333 | X     |
| M34  | <i>Sclerolaena patenticuspis</i>                       | Murraylands     | -34.461072 | 139.472527 | 553 | 553 | 898 | 867 | 31 | 1333 | 1461  |
| X87  | <i>Senecio spanomerus</i>                              | Murraylands     | -34.381012 | 139.536642 | 553 | 553 | 895 | 865 | 30 | -    | -     |
| M35  | <i>Senna artemisioides</i> ssp. <i>filifolia</i>       | Murraylands     | -34.461072 | 139.472527 | 553 | 553 | 898 | 892 | 6  | -    | -     |
| M79  | <i>Sida corrugata</i>                                  | Murraylands     | -34.540566 | 139.581067 | 553 | 553 | 889 | 857 | 32 | -    | -     |
| M58  | <i>Silene apetala</i>                                  | Murraylands     | -34.531619 | 139.585348 | 553 | 553 | 904 | 874 | 30 | -    | -     |
| A113 | <i>Silene apetala</i>                                  | Murraylands     | -34.456677 | 139.478655 | 553 | 553 | -   | X   | -  | -    | -     |
| M30  | <i>Sonchus oleraceus</i>                               | Murraylands     | -34.461045 | 139.472189 | 553 | 553 | 904 | 874 | 30 | -    | -     |
| M66  | <i>Sonchus oleraceus</i>                               | Murraylands     | -34.531488 | 139.585158 | 553 | 553 | 904 | 874 | 30 | -    | -     |
| X104 | <i>Sonchus oleraceus</i>                               | Murraylands     | -34.461243 | 139.472235 | 553 | 553 | -   | 903 | -  | -    | -     |
| M14  | <i>Sonchus oleraceus</i>                               | Murraylands     | -34.461294 | 139.471973 | 553 | 553 | -   | -   | -  | -    | -     |
| M21  | <i>Sonchus</i> sp.                                     | Murraylands     | -34.461173 | 139.471629 | 553 | 553 | 904 | 903 | 1  | -    | -     |
| A105 | <i>Teucrium racemosum</i>                              | Murraylands     | -34.542992 | 139.591191 | 553 | 553 | 904 | 874 | 30 | -    | -     |
| M47  | <i>Thysanotus baueri</i>                               | Murraylands     | -34.461232 | 139.472301 | 553 | 553 | 916 | 905 | 11 | -    | -     |
| M55  | unidentified <i>Camphorosmeae</i> <i>Amaranthaceae</i> | Murraylands     | -34.461979 | 139.472338 | 553 | 553 | 898 | 841 | 57 | 1333 | 1461  |

|      |                                          |             |            |            |     |     |     |     |    |   |   |
|------|------------------------------------------|-------------|------------|------------|-----|-----|-----|-----|----|---|---|
| M50  | unidentified Camphorosmeae Amaranthaceae | Murraylands | -34.460927 | 139.472364 | 553 | 553 | 898 | 898 | 0  | - | - |
| M19  | unidentified Gnaphalieae Asteraceae      | Murraylands | -34.461227 | 139.471778 | 553 | 553 | 904 | 865 | 39 | - | - |
| A108 | unidentified Gnaphalieae Asteraceae      | Murraylands | -34.456677 | 139.478655 | 553 | 553 | 904 | 871 | 33 | - | - |
| M25  | <i>Velleia arguta</i>                    | Murraylands | -34.460978 | 139.471702 | 553 | 553 | 904 | 899 | 5  | - | - |
| M24  | <i>Vittadinia cuneata</i>                | Murraylands | -34.460978 | 139.471702 | 553 | 553 | 892 | 867 | 25 | - | - |
| B115 | <i>Wurmbea dioica</i>                    | Murraylands | -34.461541 | 139.473541 | 553 | 553 | 898 | 863 | 35 | - | - |
| X103 | <i>Zygophyllum angustifolium</i>         | Murraylands | -34.464857 | 139.475058 | 553 | 553 | 898 | 868 | 30 | - | - |
| X89  | <i>Zygophyllum apiculatum</i>            | Murraylands | -34.379439 | 139.540514 | 553 | 553 | 898 | 867 | 31 | - | - |
| M6   | <i>Zygophyllum aurantiacum</i>           | Murraylands | -34.531619 | 139.585348 | X   | 553 | 898 | 866 | 32 | - | - |
| M31  | <i>Zygophyllum aurantiacum</i>           | Murraylands | -34.461045 | 139.472189 | 553 | 553 | 898 | 874 | 24 | - | - |

**Supplementary Table S6. Primers for gene-length barcodes.** Primer pairs designed to generate full-length gene amplicons for *rbcl* and *matK* from Amaranthaceae (prefix Caryo) and Poaceae (prefix Poa) samples.

| Primer                | Direction | Sequence                           |
|-----------------------|-----------|------------------------------------|
| rbcl <sub>a</sub> _f* | forward   | ATG TCA CCA CAA ACA GAG ACT AAA GC |
| rbcl_UR2d             | reverse   | CTT CAC AAG CNG CRG CTA GTT C      |
| matK_CaryoFwd1d       | forward   | GAA TTC CAA GGA TAT WTA GAA C      |
| matK_CaryoRev1d       | reverse   | CAT CAT TGG CCA AAT YAT GRA TAC    |
| matK_PoaFwd1          | forward   | ATT CGA AGG GTA TTC AGA AAA AC     |
| matK_Poa1554R         | reverse   | GTT CAC CAG GTC ATT GAT ACG G      |

\*Levin, R. A. *et al.* (2003) Family-level relationships of Onagraceae based on chloroplast *rbcl* and *ndhF* data. *Am. J. Bot.* **90**, 107–115.
